# Supplementary material for: Copper-catalyzed chemoselective C–H functionalization/dearomatization sequence: direct access to indole-based spirocyclic scaffolds
Source: Royal Society of Chemistry journal article supplement (doi:10.1039/d5cc00594a), 2025-01-01

## ***Supporting information***

### **Copper-Catalyzed Chemoselective C-H**

### **Functionalization/Dearomatization Sequence: Direct Access to**

### **Indole-Based Spirocyclic Scaffolds**

*Yuting Zhao,<sup>†</sup> Xin Ji,<sup>†</sup> Yuanjing Xiao<sup>\*†</sup>, Xingxing Wu<sup>\*¶</sup> and Lu Liu<sup>\*†‡</sup>*

*<sup>†</sup>School of Chemistry and Molecular Engineering, East China Normal University, 500 Dongchuan Road, Shanghai 200241, P. R. China*

*<sup>¶</sup>State Key Laboratory of Green Pesticide, Key Laboratory of Green Pesticide and Agricultural Bioengineering, Ministry of Education, Guizhou University, Huaxi District, Guiyang, 550025, P. R. China;*

*<sup>‡</sup>Shanghai Engineering Research Center of Molecular Therapeutics and New Drug Development, East China Normal University, Shanghai 200062, P. R. China*

*E-mail : yjxiao@chem.ecnu.edu.cn; wuxx@gzu.edu.cn; lliu@chem.ecnu.edu.cn.*

#### **Table of Contents**

|                                                                        |            |
|------------------------------------------------------------------------|------------|
| <b>1. General Information .....</b>                                    | <b>S2</b>  |
| <b>2. Optimization of reaction conditions .....</b>                    | <b>S3</b>  |
| <b>3. Copper catalyzed carbocyclization of 4a .....</b>                | <b>S7</b>  |
| <b>4. General procedure for the synthesis of 1 and 2 .....</b>         | <b>S8</b>  |
| <b>4.1 Synthesis of diazo compound 1 .....</b>                         | <b>S8</b>  |
| <b>4.2 Synthesis of indoles 2 .....</b>                                | <b>S9</b>  |
| <b>5. General procedure for the synthesis of spirocyclic 3 .....</b>   | <b>S11</b> |
| <b>6. Gram scale preparation of 3a and synthetic application .....</b> | <b>S25</b> |
| <b>6.1 Gram scale preparation of spirocyclic 3a .....</b>              | <b>S25</b> |
| <b>6.2 Synthetic application .....</b>                                 | <b>S25</b> |
| <b>7. The studies of biological activity .....</b>                     | <b>S28</b> |
| <b>8. References .....</b>                                             | <b>S30</b> |
| <b>9. X-ray Crystal data for 6a .....</b>                              | <b>S31</b> |
| <b>10. NMR and HRMS spectra of new compounds .....</b>                 | <b>S31</b> |

## 1. General Information

Unless otherwise noted, all air- and moisture-sensitive manipulations were carried out with standard Schlenk techniques under nitrogen or in a glove box under nitrogen. All reactions were carried out under a nitrogen atmosphere; materials obtained from commercial suppliers were used directly without further purification. Solvents were distilled following standard procedures before use. Reactions were monitored by thin layer chromatography (TLC) using silicycle pre-coated silica gel plates. Flash column chromatography was performed on silica gel 60 (particle size 300-400 mesh ASTM, purchased from Yantai, China) and eluted with petroleum ether/ethyl acetate.

Dichloromethane ( $\text{CH}_2\text{Cl}_2$ ), Trichloromethane, dichloroethane and ethyl acetate were freshly distilled from  $\text{CaH}_2$ ; tetrahydrofuran (THF), toluene and ether were dried with sodium benzophenone and distilled before use.

$^1\text{H}$  NMR spectra were recorded on a BRUKER 500 (500 MHz) or BRUKER 600 (600 MHz) spectrometer in  $\text{CDCl}_3$ . Chemical shifts are reported in ppm with tetramethylsilane (TMS: 0 ppm) with the solvent resonance as the internal standard. Data are reported as follows: chemical shift, multiplicity (s = singlet, d = doublet, t = triplet, q = quartet, m = multiplet), coupling constants (Hz), and integration.  $^{13}\text{C}$  NMR spectra were recorded on a BRUKER 500 (125 MHz) or BRUKER 600 (150 MHz) spectrometer in  $\text{CDCl}_3$  with complete proton decoupling. Chemical shifts are reported in ppm with the deuterium solvent as the internal standard (e.g.  $\text{CDCl}_3$ : 77.0 ppm)

## 2. Optimization of reaction conditions

Supplementary Table 1. Optimization of reaction conditions<sup>a</sup>

| <div style="display: flex; justify-content: space-around; align-items: flex-start;"> <div style="text-align: center;"> <p><b>L1</b> R<sub>1</sub> = Me, R<sub>2</sub> = Me<br/> <b>L2</b> R<sub>1</sub> = H, R<sub>2</sub> = H<br/> <b>L3</b> R<sub>1</sub> = H, R<sub>2</sub> = OMe</p> </div> <div style="text-align: center;"> <p><b>L4</b> R<sub>3</sub> = Me, R<sub>4</sub> = Ph<br/> <b>L5</b> R<sub>3</sub> = Ph, R<sub>4</sub> = H<br/> <b>L6</b> R<sub>3</sub> = Me, R<sub>4</sub> = H</p> </div> <div style="text-align: center;"> <p><b>L7</b></p> </div> </div> |                                    |                   |           |                 |                        |
|-----------------------------------------------------------------------------------------------------------------------------------------------------------------------------------------------------------------------------------------------------------------------------------------------------------------------------------------------------------------------------------------------------------------------------------------------------------------------------------------------------------------------------------------------------------------------------|------------------------------------|-------------------|-----------|-----------------|------------------------|
| Entry                                                                                                                                                                                                                                                                                                                                                                                                                                                                                                                                                                       | Cat.                               | Solvent           | L         | dr <sup>b</sup> | Yield <sup>b</sup> (%) |
|                                                                                                                                                                                                                                                                                                                                                                                                                                                                                                                                                                             |                                    |                   |           | 3a              | 3a/4a                  |
| 1                                                                                                                                                                                                                                                                                                                                                                                                                                                                                                                                                                           | Cu(OTf) <sub>2</sub>               | CHCl <sub>3</sub> | -         | 2.6:1           | 44/0                   |
| 2                                                                                                                                                                                                                                                                                                                                                                                                                                                                                                                                                                           | Sc(OTf) <sub>3</sub>               | CHCl <sub>3</sub> | -         | -               | -                      |
| 3                                                                                                                                                                                                                                                                                                                                                                                                                                                                                                                                                                           | AgOTf                              | CHCl <sub>3</sub> | -         | 1.2:1           | 5/5                    |
| 4                                                                                                                                                                                                                                                                                                                                                                                                                                                                                                                                                                           | Fe(OTf) <sub>3</sub>               | CHCl <sub>3</sub> | -         | -               | -                      |
| 5                                                                                                                                                                                                                                                                                                                                                                                                                                                                                                                                                                           | CuCl                               | CHCl <sub>3</sub> | -         | 4.4:1           | 12/5                   |
| 6                                                                                                                                                                                                                                                                                                                                                                                                                                                                                                                                                                           | CuCl <sub>2</sub>                  | CHCl <sub>3</sub> | -         | 1.5:1           | 10/0                   |
| 7                                                                                                                                                                                                                                                                                                                                                                                                                                                                                                                                                                           | L'AuOTf                            | CHCl <sub>3</sub> | -         | 1.0:1           | 12/0                   |
| 8                                                                                                                                                                                                                                                                                                                                                                                                                                                                                                                                                                           | Rh <sub>2</sub> (OAc) <sub>4</sub> | CHCl <sub>3</sub> | -         | -               | -                      |
| 9                                                                                                                                                                                                                                                                                                                                                                                                                                                                                                                                                                           | Cu(OTf) <sub>2</sub>               | CHCl <sub>3</sub> | <b>L2</b> | 5.5:1           | 40/22                  |
| 10                                                                                                                                                                                                                                                                                                                                                                                                                                                                                                                                                                          | Cu(OTf) <sub>2</sub>               | CHCl <sub>3</sub> | <b>L3</b> | 4.4:1           | 48/0                   |
| 11                                                                                                                                                                                                                                                                                                                                                                                                                                                                                                                                                                          | Cu(OTf) <sub>2</sub>               | CHCl <sub>3</sub> | <b>L4</b> | 1.5:1           | 30/0                   |
| 12                                                                                                                                                                                                                                                                                                                                                                                                                                                                                                                                                                          | Cu(OTf) <sub>2</sub>               | CHCl <sub>3</sub> | <b>L5</b> | 1.2:1           | 23/0                   |
| 13                                                                                                                                                                                                                                                                                                                                                                                                                                                                                                                                                                          | Cu(OTf) <sub>2</sub>               | CHCl <sub>3</sub> | <b>L6</b> | -               | -                      |
| 14                                                                                                                                                                                                                                                                                                                                                                                                                                                                                                                                                                          | Cu(OTf) <sub>2</sub>               | CHCl <sub>3</sub> | <b>L7</b> | 2.8:1           | 7/0                    |
| 15                                                                                                                                                                                                                                                                                                                                                                                                                                                                                                                                                                          | Cu(OTf) <sub>2</sub>               | CHCl <sub>3</sub> | <b>L1</b> | 7.3:1           | 75/5                   |
| 16                                                                                                                                                                                                                                                                                                                                                                                                                                                                                                                                                                          | Cu(OTf) <sub>2</sub>               | DCE               | <b>L1</b> | 7.6:1           | 60/0                   |
| 17                                                                                                                                                                                                                                                                                                                                                                                                                                                                                                                                                                          | Cu(OTf) <sub>2</sub>               | CCl <sub>4</sub>  | <b>L1</b> | -               | -                      |
| <b>18</b>                                                                                                                                                                                                                                                                                                                                                                                                                                                                                                                                                                   | <b>Cu(OTf)<sub>2</sub></b>         | <b>DCM</b>        | <b>L1</b> | <b>8.0:1</b>    | <b>85/0</b>            |
| 19                                                                                                                                                                                                                                                                                                                                                                                                                                                                                                                                                                          | Cu(OTf) <sub>2</sub>               | PhCl              | <b>L1</b> | 4.6:1           | 64/0                   |
| 20                                                                                                                                                                                                                                                                                                                                                                                                                                                                                                                                                                          | Cu(OTf) <sub>2</sub>               | toluene           | <b>L1</b> | 4.0:1           | 50/0                   |

<sup>a</sup>Unless otherwise noted, all reactions were performed with **1a** (0.2 mmol), **2a** (0.1 mmol), Cat. (10 mol%), **L** (15 mol%) in solvent (2.0 mL) at 40 °C under Ar atmosphere for 2 h; The yields were determined by crude <sup>1</sup>H NMR using CH<sub>2</sub>Br<sub>2</sub> as internal standard. L' = (2,4-<sup>t</sup>Bu<sub>2</sub>PhO)<sub>3</sub>P.

Initially,  $\alpha$ -alkynyl- $\alpha$ -diazoketones **1a** and 2-phenylindole **2a** were selected as model substrates for reaction screening. Initially, **1a** (2.0 equiv) and **2a** were subjected to the reaction in CHCl<sub>3</sub> at 40 °C by using Cu(OTf)<sub>2</sub> as catalyst, spirocyclic product **3a** was indeed formed in 44% yield with 2.6:1 diastereoselectivity (Table 1, entry 1). Among the catalysts tested, Cu(OTf)<sub>2</sub> was found to be optimal (Table 1, entries 1-8) in terms of the yield of spirocyclic product **3a**. To further improve the yield and diastereoselectivity, we then explored the effect of the types of ligand on the reaction (entries 9-15). Using 4,7-dimethoxy-1,10-phenanthroline (**L3**) as a ligand, the dr value and yield of product **3a** were slightly improved (entry 10). When the ligand species was switched to 1,10-phenanthroline (**L2**), although the dr value of product **3a** was further increased to 5.5:1, however, the by-product, C-H functionalization product **4a** was obtained in 22% yield (entry 9). Continuing to screen the ligand species, we found that when the 3,4,7,8-tetramethyl-1,10-phenanthroline (**L1**) ligand was used, product **3a** achieved 75% yield and the dr value reached 7.3:1, only a little by-product **4a** was generated (entry 15). After screening the solvents, DCM gave the best results, and the yield of product **3a** was improved to 85% with 8.0:1 dr, without by-product **4a** formed (entry 18, for more details, please see Table 2 and Table 3).

**Supplementary Table 2.** Optimization of reaction conditions<sup>a</sup>

| 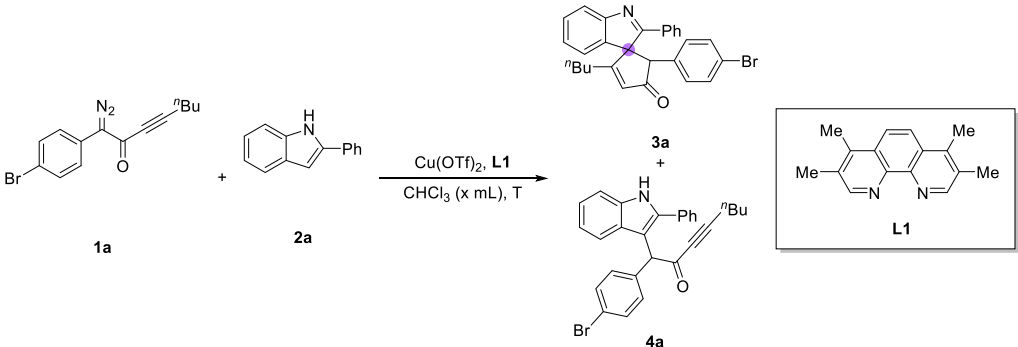 |                                   |                            |                 |       |
|------------------------------------------------------------------------------------|-----------------------------------|----------------------------|-----------------|-------|
| Entry                                                                              | Cat.                              | Solvent (x ml)             | dr <sup>b</sup> |       |
|                                                                                    |                                   |                            | 3a              | 3a/4a |
| 1                                                                                  | Cu(OTf) <sub>2</sub> <sup>c</sup> | CHCl <sub>3</sub> (2.0 mL) | 4.5:1           | 22/8  |
| 2                                                                                  | Cu(OTf) <sub>2</sub> <sup>d</sup> | CHCl <sub>3</sub> (2.0 mL) | 3.8:1           | 70/0  |
| 3                                                                                  | Cu(OTf) <sub>2</sub> <sup>e</sup> | CHCl <sub>3</sub> (2.0 mL) | -               | -     |
| 4                                                                                  | Cu(OTf) <sub>2</sub> <sup>f</sup> | CHCl <sub>3</sub> (2.0 mL) | 1.4:1           | 66/0  |
| 5                                                                                  | Cu(OTf) <sub>2</sub> <sup>g</sup> | CHCl <sub>3</sub> (2.0 mL) | 3.9:1           | 75/0  |
| 6                                                                                  | Cu(OTf) <sub>2</sub> <sup>h</sup> | CHCl <sub>3</sub> (2.0 mL) | -               | -     |
| 7                                                                                  | Cu(OTf) <sub>2</sub> <sup>i</sup> | CHCl <sub>3</sub> (2.0 mL) | 6.2:1           | 60/0  |
| 8                                                                                  | Cu(OTf) <sub>2</sub> <sup>j</sup> | CHCl <sub>3</sub> (2.0 mL) | 5.8:1           | 70/0  |
| 9                                                                                  | Cu(OTf) <sub>2</sub> <sup>k</sup> | CHCl <sub>3</sub> (2.0 mL) | 7.3:1           | 68/0  |
| 10                                                                                 | Cu(OTf) <sub>2</sub>              | CHCl <sub>3</sub> (1.0 mL) | 6.2:1           | 72/0  |
| 11                                                                                 | Cu(OTf) <sub>2</sub>              | CHCl <sub>3</sub> (4.0 mL) | 7.2:1           | 66/0  |

<sup>a</sup>Unless otherwise noted, all reactions were performed with **1a** (0.2 mmol), **2a** (0.1 mmol), Cat. (10 mol%), **L1** (15 mol%) in solvent (2.0 mL) at 40 °C under Ar atmosphere for 2 h; <sup>b</sup>Yields were determined by crude <sup>1</sup>H NMR using CH<sub>2</sub>Br<sub>2</sub> as internal standard; <sup>c</sup>Reaction stirred at 30 °C; <sup>d</sup>Reaction stirred at 50 °C; <sup>e</sup>Using Cat. 5 mol%; <sup>f</sup>Using Cat. 20 mol%; <sup>g</sup>Using **L1** 10 mol%; <sup>h</sup>Using **L1** 20 mol%; <sup>i</sup>Using **1a** (0.1 mmol); <sup>j</sup>Using **1a** (0.25 mmol); <sup>k</sup>Reaction stirred for 3 h.

**Supplementary Table 3. Optimization of reaction conditions<sup>a</sup>**

| Entry | L           | er <sup>c</sup> (%) | dr <sup>b</sup> | Yield <sup>b</sup> (%) |
|-------|-------------|---------------------|-----------------|------------------------|
|       |             | 3a                  | 3a              | 3a/4a                  |
| 1     | <b>L8</b>   | 49:51               | 1.2:1           | 27/5                   |
| 2     | <b>L9</b>   | 55:45               | 1.3:1           | 19/3                   |
| 3     | <b>L10</b>  | 56:44               | 1.3:1           | 32/7                   |
| 4     | <b>L11</b>  | 52:48               | 5.5:1           | 27/4                   |
| 5     | <b>L12</b>  | 48:52               | 2.3:1           | 27/10                  |
| 6     | <b>CPA1</b> | 45:55               | >20:1           | 27/9                   |

<sup>a</sup>Unless otherwise noted, all reactions were performed with **1a** (0.2 mmol), **2a** (0.1 mmol), Cat. (10 mol%), **L** (15 mol%) in solvent (2.0 mL) at 40 °C under Ar atmosphere for 2 h; <sup>b</sup>Yields were determined by crude <sup>1</sup>H NMR using CH<sub>2</sub>Br<sub>2</sub> as internal standard; <sup>c</sup>The er was determined by HPLC.

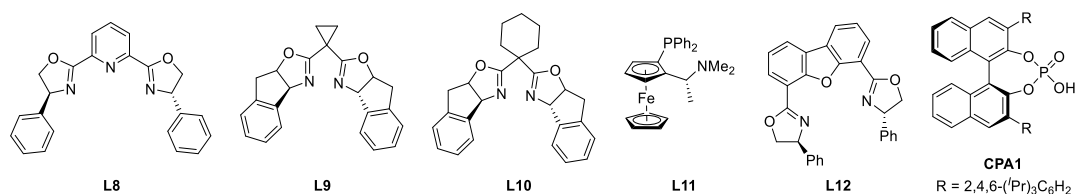

### 3. Copper catalyzed carbocyclization of 4a

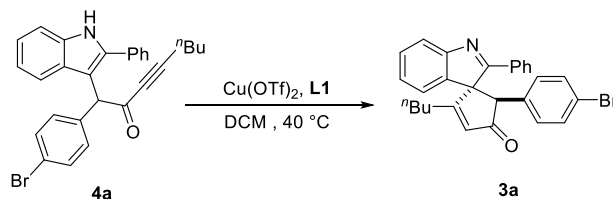

#### 1-(4-bromophenyl)-1-(2-phenyl-1*H*-indol-3-yl)oct-3-yn-2-one (4a)

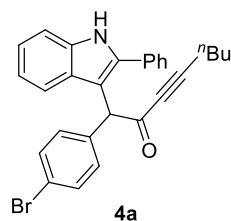

In a dried glass tube, a mixture of  $\text{Cu}(\text{OTf})_2$  (7.2 mg, 10 mol%), 1,10-phenanthroline (5.4 mg, 15 mol%) in DCM (2 mL) was stirred at room temperature for 15 mins. Subsequently, indoles **2** (0.2 mmol, 1.0 equiv.) was added to the reaction mixture at room temperature, and diazo compounds **1** (0.4 mmol, 2.0 equiv.) was dissolved in 2 mL DCM and added to the reaction mixture. Then the resulting mixture was continually stirred at 40 °C for 1 h. The mixture was concentrated under reduced pressure and the residue was purified by column chromatography on silica gel (PE/EA = 30:1 to 10:1) to afford the desired product yellow oil **4a** (19.7 mg, 21%) and **3a** (34.7 mg, 37%). Subsequently, in a dried glass tube, a mixture of  $\text{Cu}(\text{OTf})_2$  (1.5 mg, 10 mol%), 3,4,7,8-tetramethyl-1,10-phenanthroline (1.5 mg, 15 mol%) in DCM (0.5 mL) was stirred at room temperature for 15 mins. Subsequently, **4a** (0.04 mmol, 1.0 equiv.) was dissolved in 0.5 mL DCM and added to the reaction mixture. Then the resulting mixture was continually stirred at 40 °C for 2 h and **4a** was consumed completely determined by TLC analysis. The mixture was concentrated under reduced pressure and the residue was purified by column chromatography on silica gel (PE/EA = 30:1 to 10:1) to afford the desired product **3a**. And it was found that **4a** was almost completely converted to the cyclization product **3a** (18.2 mg, 92%). **4a** :  $^1\text{H}$  NMR (600 MHz,  $\text{CDCl}_3$ )  $\delta$  8.35 (s, 1H), 7.49 – 7.37 (m, 9H), 7.21 (t,  $J = 7.6$  Hz, 1H), 7.12 (d,  $J = 8.2$  Hz, 2H), 7.07 (t,  $J = 7.6$  Hz, 1H), 5.42 (s, 1H), 2.09 – 2.13 (m, 2H), 1.26 – 1.22 (m, 2H), 1.07 (h,  $J = 7.3$  Hz, 2H), 0.75 (t,  $J = 7.3$  Hz, 3H);  $^{13}\text{C}$  NMR (150 MHz,  $\text{CDCl}_3$ )  $\delta$  185.4, 138.0, 136.7, 136.0, 132.1, 131.3, 131.0, 129.0, 128.5, 128.4, 127.7, 122.6, 121.0, 121.0, 120.4, 111.0, 107.3, 96.4, 81.5, 56.7, 29.3, 21.5, 18.6, 13.4; HRMS (ESI) calculated for  $[\text{C}_{28}\text{H}_{24}\text{BrNNaO}]$   $[\text{M}+\text{Na}]^+$ : 492.0933, found: 492.0935.

## 4. General procedure for the synthesis of 1 and 2

### 4.1 Synthesis of diazo compound 1

Under argon atmosphere, an oven dried round-bottom flask was charged with diazo precursor (5 mmol, 1 equiv.) and *p*-acetamidobenzenesulfonyl azide (*p*-ABSA, 6 mmol, 1.2 equiv.) in acetonitrile (20 mL). To this solution at 0 °C was added 1,8-diazaobicyclo [5.4.0]undec-7-ene (7.5 mmol, 1.5 equiv.) in one portion. After stirring at 0 °C for 5 minutes, the reaction was quenched with saturated sodium bicarbonate solution. Diethyl ether was added and layers were separated. The aqueous layer was extracted with diethyl ether for two more times. The combined organic layers were washed with brine, dried over magnesium sulfate, filtered through a plug of silica gel and concentrated in vacuo. The crude residue was purified by flash chromatography.

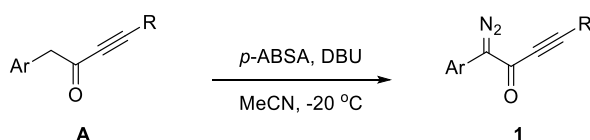

All of the known diazo **1** were prepared according to the literature procedures.<sup>[1]</sup> Characterization of new diazo **1n**, **1p**, **1q**, **1r** and **1s** are listed below.

#### 1. 1-diazo-1-(*p*-tolyl)oct-3-yn-2-one (**1n**)

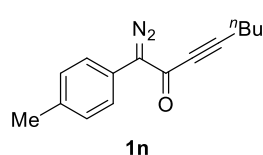

Following the general procedure. 897.2 mg, 61% yield; yellow solid;  $R_f$  = 0.5 (PE/EA = 10:1). <sup>1</sup>H NMR (500 MHz, CDCl<sub>3</sub>) δ 7.50 (d,  $J$  = 8.8 Hz, 2H), 7.37 (d,  $J$  = 8.8 Hz, 2H), 2.41 (t,  $J$  = 7.1 Hz, 2H), 1.61 – 1.55 (m, 2H), 1.44 (q,  $J$  = 7.5 Hz, 2H), 0.94 (t,  $J$  = 7.3 Hz, 3H).

#### 2. 1-(3-bromophenyl)-1-diazo-oct-3-yn-2-one (**1p**)

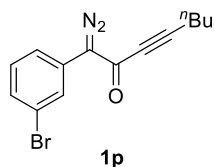

Following the general procedure. 768.8 mg, 45% yield; yellow oil;  $R_f$  = 0.5 (PE/EA = 10:1). <sup>1</sup>H NMR (600 MHz, CDCl<sub>3</sub>) δ 7.75 (t,  $J$  = 1.7 Hz, 1H), 7.47 (d,  $J$  = 8.0 Hz, 1H), 7.36 (d,  $J$  = 7.9 Hz, 1H), 7.29 – 7.25 (m, 1H), 2.41 (t,  $J$  = 7.1 Hz, 2H), 1.60 – 1.55 (m, 2H), 1.48 – 1.40 (m, 2H), 0.94 (t,  $J$  = 7.4 Hz, 3H); HRMS (ESI) calculated for [C<sub>14</sub>H<sub>13</sub>BrN<sub>2</sub>NaO] [M+Na]<sup>+</sup>: 327.0103, found: 327.0092.



### 3. 1-diazo-1-(*m*-tolyl)oct-3-yn-2-one (1q)

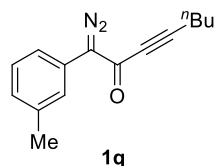

Following the general procedure. 340.2mg, 40% yield; yellow oil;  $R_f = 0.45$  (PE/EA = 10:1).  $^1\text{H NMR}$  (600 MHz,  $\text{CDCl}_3$ )  $\delta$  7.37 – 7.32 (m, 2H), 7.28 (t,  $J = 7.7$  Hz, 1H), 7.05 (d,  $J = 7.5$  Hz, 1H), 2.40 (t,  $J = 7.1$  Hz, 2H), 2.36 (s, 3H), 1.60 – 1.54 (m, 2H), 1.47 – 1.40 (m, 2H), 0.93 (t,  $J = 7.2$  Hz, 3H); **HRMS** (ESI) calculated for  $[\text{C}_{15}\text{H}_{16}\text{N}_2\text{NaO}]$   $[\text{M}+\text{Na}]^+$ : 263.1155, found: 263.1149.

### 4. 1-(4-chlorophenyl)-1-diazopent-3-yn-2-one (1r)

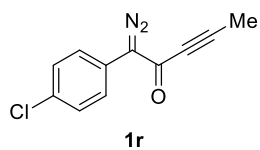

Following the general procedure. 340.2mg, 40% yield; yellow solid;  $R_f = 0.45$  (PE/EA = 10:1).  $^1\text{H NMR}$  (500 MHz,  $\text{CDCl}_3$ )  $\delta$  7.51 – 7.47 (m, 2H), 7.36 (d,  $J = 8.8$  Hz, 2H), 2.06 (s, 3H).

### 5. 1-(4-chlorophenyl)-1-diazonon-3-yn-2-one (1s)

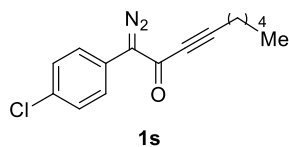

Following the general procedure. 1.0076g, 52% yield; yellow solid;  $R_f = 0.5$  (PE/EA = 10:1).  $^1\text{H NMR}$  (500 MHz,  $\text{CDCl}_3$ )  $\delta$  7.50 (d,  $J = 8.8$  Hz, 2H), 7.37 (d,  $J = 8.7$  Hz, 2H), 2.40 (t,  $J = 7.1$  Hz, 2H), 1.63 – 1.58 (m, 2H), 1.44 – 1.30 (m, 4H), 0.92 (t,  $J = 7.1$  Hz, 3H). **HRMS** (ESI) calculated for  $[\text{C}_{15}\text{H}_{15}\text{ClN}_2\text{NaO}]$   $[\text{M}+\text{Na}]^+$ : 297.0765, found: 297.0757.

## 4.2 Synthesis of indoles 2

### Method A:

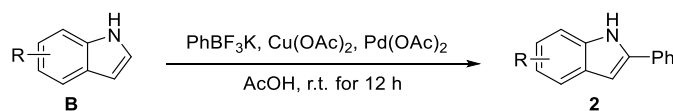

Synthesis compound **2** with reference to Chen's report<sup>[2]</sup>. A mixture of indole (2 mmol),  $\text{Pd}(\text{OAc})_2$  (22.4 mg, 5 mol%),  $\text{Cu}(\text{OAc})_2$  (36.4 mg, 10 mol%), potassium phenylfluoroborate (3 mmol), acetic acid (10 mL) was stirred at room temperature under air for 12 h. Afterward, the reaction mixture was filtered through a plug of Celite and the filtrate was evaporated. The resulting oil was dissolved in ether (25 mL) and washed with aqueous  $\text{NaHCO}_3$  (2×15 mL). The organic layer was dried with  $\text{Na}_2\text{SO}_4$

and concentrated. The residue was purified by flash column chromatography to afford the corresponding product **2**. Compound **2k** synthesised according to **method A**.

**Method B:**

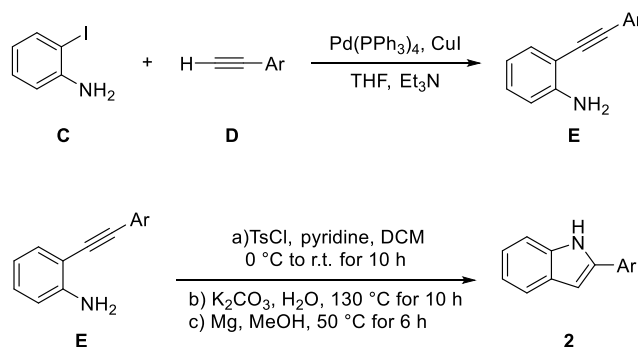

To a solution of 2-Iodoaniline (2.0 mmol) in dry Et<sub>3</sub>N and THF (v/v = 1:1, 3 mL) **D** (2.0 mmol), Pd(PPh<sub>3</sub>)<sub>4</sub> (115.6 mg, 5 mol%) and CuI (4.0 mg, 2 mol%) was added. The mixture was heated at reflux for 4 h. The solvent was removed under reduced pressure and the residue was filtered through Celite using toluene as solvent. The solvent was removed and the crude residue was purified by flash chromatography on silica gel. Then the obtained **E** taken in DCM (20 mL) was added with pyridine (3 equiv.) followed by tosyl chloride (1.3 equiv.) at 0 °C over a period of 15 mins. After addition completes, reaction stirred at RT for 12 h. After reaction completed (monitored by TLC), reaction mass quenched with ice-cold water and extracted into DCM. The obtained crude material passed through flash column chromatography to give pure product. To a solution of K<sub>2</sub>CO<sub>3</sub> (0.15 equiv.) in water (1.5 mL) was added to the product obtained in one step up. The resulting mixture was stirred vigorously at 130 °C in a sealed tube under an argon atmosphere for 10 h. The reaction solution was cooled to room temperature and extracted by DCM (three times), and the organic phase was collected. Pure product was obtained by flash chromatography on silica gel. To a solution of the product obtained in one step up in MeOH (0.05 M) was added Mg (15 equiv.). After being stirred at 50 °C for 6 h, the reaction mixture was poured into aq. NH<sub>4</sub>Cl and then the product was extracted with DCM (three times). The combined organic layer was washed with brine, dried over MgSO<sub>4</sub>, and concentrated in vacuo. The residue was

purified by column chromatography on silica gel to afford **2**. Compound **2a**, **2b**, **2c**, **2d**, **2e**, **2f**, **2g**, **2h**, **2i** and **2j** synthesised according to **method B**<sup>[3]</sup>.

## 5. General procedure for the synthesis of spirocyclic **3**

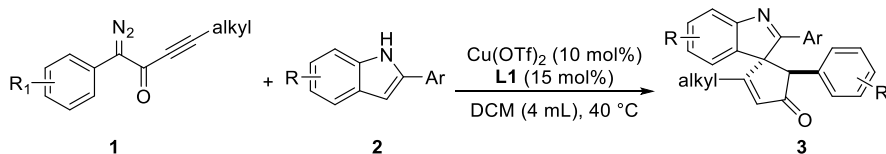

**General procedure 1 (GP-1):** In a dried glass tube, a mixture of  $\text{Cu}(\text{OTf})_2$  (7.2 mg, 10 mol%), 3,4,7,8-tetramethyl-1,10-phenanthroline (7.1 mg, 15 mol%) in DCM (2 mL) was stirred at room temperature for 15 mins. Subsequently, indoles **2** (0.2 mmol, 1.0 equiv.) was added to the reaction mixture at room temperature, and diazo compounds **1** (0.4 mmol, 2.0 equiv.) was dissolved in 2 mL DCM and added to the reaction mixture. Then the resulting mixture was continually stirred at 40 °C for 2 h and **2** was consumed completely determined by TLC analysis. The dr of the product was calculated by crude  $^1\text{H}$  NMR. The mixture was concentrated under reduced pressure and the residue was purified by column chromatography on silica gel (PE/EA = 60:1 to 30:1 or PE/EA = 50:1 to 20:1) to afford the desired product **3**.

### 1. (1*R*,5*R*)-5-(4-bromophenyl)-2-butyl-2'-phenylspiro[cyclopentane-1,3'-indol]-2-en-4-one

(**3a**)

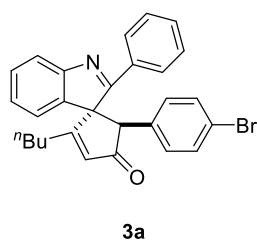

The general procedure was followed using **1a** (121.3 mg, 0.4 mmol, 2.0 equiv.) and **2a** (37.5 mg, 0.2 mmol, 1.0 equiv.),  $\text{Cu}(\text{OTf})_2$  (7.2 mg, 10 mol%), 3,4,7,8-tetramethyl-1,10-phenanthroline (7.1 mg, 15 mol%) and 4 mL DCM by **GP-1**, TLC ( $R_f$  = 0.3, PE/EA = 10:1). After purification by column chromatography (PE/EA = 60:1 to 30:1), **3a** (dr = 9.0:1, 62.4 mg,

83%) was obtained as yellow oil: Two diastereoisomers are hard to be separated by column chromatography on silica gel.  $^1\text{H}$  NMR (500 MHz,  $\text{CDCl}_3$ )  $\delta$  [8.07 – 8.03 (m, 1.8H), 7.76 – 7.73 (m, 0.1H), 7.51 – 7.50 (m, 0.1H)], [7.57 – 7.51 (m, 3.6H), 7.38 – 7.35 (m, 0.4H)], 7.25 – 7.21 (m, 1H), [7.10 (d,  $J$  = 8.4 Hz, 1.8H), 6.94 (d,  $J$  = 8.4 Hz, 0.2H)], 7.05 (t,  $J$  = 7.5 Hz, 1H), [7.19 – 7.17 (m, 0.1H), 6.85 (d,  $J$  = 7.4 Hz, 0.9H)], [6.60 (d,  $J$  = 8.2 Hz, 1.8H), 6.34 (d,  $J$  = 8.2 Hz, 0.2H)], 6.58 (s, 1H), [4.47 (s, 0.9H), 4.36 (s, 0.1H)], 2.11 – 2.02 (m, 1H), 1.71 – 1.64 (m, 1H), 1.50 – 1.39 (m,

2H), 1.19 – 1.13 (m, 2H), [0.79 – 0.77 (m, 0.3H), 0.74 (t,  $J = 7.3$  Hz, 2.7H)];  $^{13}\text{C}$  NMR (125 MHz,  $\text{CDCl}_3$ )  $\delta$  204.2, 181.1, 176.4, 154.7, 137.9, 132.7, 132.3, 131.8, 131.0, 130.4, 129.4, 129.4, 129.2, 127.4, 125.8, 123.0, 121.2, 121.1, 73.5, 59.9, 29.5, 28.7, 22.0, 13.6; HRMS (ESI) calculated for  $[\text{C}_{28}\text{H}_{24}\text{BrNNaO}]$   $[\text{M}+\text{Na}]^+$ : 492.0933, found: 492.0936.

2. **(1*R*,5*R*)-5-(4-bromophenyl)-2-butyl-2'-(*p*-tolyl)spiro[cyclopentane-1,3'-indol]-2-en-4-one (3b)**

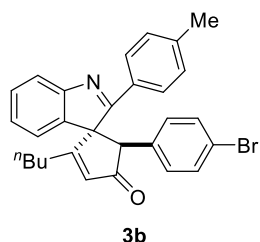

The general procedure was followed using **1a** (121.0 mg, 0.4 mmol, 2.0 equiv.) and **2b** (37.8 mg, 0.2 mmol, 1.0 equiv.),  $\text{Cu}(\text{OTf})_2$  (7.2 mg, 10 mol%), 3,4,7,8-tetramethyl-1,10-phenanthroline (7.1 mg, 15 mol%) and 4 mL DCM by **GP-1**, TLC ( $R_f = 0.3$ , PE/EA = 10:1). After purification by column chromatography (PE/EA = 60:1 to 30:1), **3b** (dr = 5:1, 83.9 mg, 95%) was obtained as yellow solid: Two diastereoisomers are hard to be separated by column chromatography on silica gel.  $^1\text{H}$  NMR (500 MHz,  $\text{CDCl}_3$ )  $\delta$  [7.95 (d,  $J = 8.0$  Hz, 1.8H), 7.72 (d,  $J = 8.0$  Hz, 0.1H), 7.95 (m, 0.1H)], [7.50 (d,  $J = 7.7$  Hz, 0.9H), 7.30 – 7.28 (m, 0.1H)], [7.34 (d,  $J = 7.9$  Hz, 1.8H), 7.31 (d,  $J = 7.9$  Hz, 0.2H)], 7.22 (t,  $J = 7.7$  Hz, 1H), [7.09 (d,  $J = 8.3$  Hz, 1.8H), 7.00 – 6.98 (m, 0.2H)], 7.02 (t,  $J = 7.4$  Hz, 1H), [6.95 (d,  $J = 7.4$  Hz, 0.1H), 6.83 (d,  $J = 7.4$  Hz, 0.9H)], [6.60 (d,  $J = 8.1$  Hz, 1.8H), 6.37 (d,  $J = 8.1$  Hz, 0.2H)] 6.57 (s, 1H), [4.47 (s, 0.9H), 4.36 (s, 0.1H)], [2.45 (s, 2.7H), 1.69 (s, 0.3H)], 2.10 – 2.02 (m, 1H), 1.69 – 1.63 (m, 1H), 1.49 – 1.39 (m, 2H), 1.16 (q,  $J = 6.6, 5.9$  Hz, 2H), [0.78 – 0.76 (m, 0.3H), 0.73 (d,  $J = 7.3$  Hz, 2.7H)];  $^{13}\text{C}$  NMR (125 MHz,  $\text{CDCl}_3$ )  $\delta$  204.3, 181.2, 176.3, 154.8, 142.4, 137.8, 132.7, 131.0, 130.4, 130.2, 129.6, 129.3, 129.2, 127.4, 125.6, 123.0, 121.1, 120.9, 73.4, 60.2, 29.5, 28.7, 22.0, 21.6, 13.6; m.p. = 119.7 – 129.1 °C; HRMS (ESI) calculated for  $[\text{C}_{29}\text{H}_{26}\text{BrNNaO}]$   $[\text{M}+\text{Na}]^+$ : 506.1090, found: 506.1090.

3. **(1*R*,5*R*)-5-(4-bromophenyl)-2-butyl-2'-(4-ethylphenyl)spiro[cyclopentane-1,3'-indol]-2-en-4-one (3c)**

The general procedure was followed using **1a** (121.1 mg, 0.4 mmol, 2.0 equiv.) and **2c** (41.5 mg, 0.2 mmol, 1.0 equiv.),  $\text{Cu}(\text{OTf})_2$  (7.3 mg, 10 mol%), 3,4,7,8-tetramethyl-1,10-phenanthroline (7.1 mg, 15 mol%) and 4 mL DCM by **GP-1**, TLC ( $R_f = 0.3$ , PE/EA = 10:1). After purification by column chromatography (PE/EA = 50:1 to 20:1), **3c** (dr = 5.4:1, 52.3 mg, 56%) was obtained as

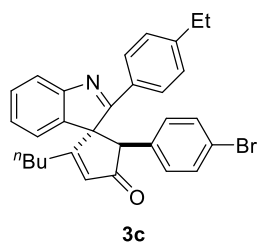

yellow oil: Two diastereoisomers are hard to be separated by column chromatography on silica gel. **<sup>1</sup>H NMR (600 MHz, CDCl<sub>3</sub>)** δ 8.02 – 7.92 (m, 2H), 7.50 (d, *J* = 5.3 Hz, 1H), 7.37 (d, *J* = 5.7 Hz, 2H), 7.22 (t, *J* = 7.4 Hz, 1H), [7.12 – 7.08 (m, 1.8H), 6.94 – 6.91 (m, 0.2H)], 7.02 (d, *J* = 6.2 Hz, 1H), 6.83 (d, *J* = 7.1 Hz, 1H), [6.61 (d, *J* = 5.7 Hz, 1.8H), 6.36 – 6.34

(m, 0.2H)], 6.57 (s, 1H), [4.47 (s, 0.9H), 4.35 (s, 0.1H)], [2.76 – 2.74 (m, 1.8H), 2.64 – 2.60 (m, 0.2H)], 2.10 – 2.04 (m, 1H), 1.69 – 1.64 (m, 1H), 1.48 – 1.39 (m, 2H), 1.33 – 1.27 (m, 3H), 1.20 – 1.14 (m, 2H), 0.76 – 0.72 (m, 3H); **<sup>13</sup>C NMR (150 MHz, CDCl<sub>3</sub>)** δ 204.4, 176.4, 148.6, 137.8, 132.7, 131.0, 130.4, 129.8, 129.3, 129.1, 129.0, 127.5, 125.6, 123.0, 121.1, 120.9, 73.4, 60.1, 29.5, 28.9, 28.7, 22.0, 15.1, 13.6; **HRMS** (ESI) calculated for [C<sub>30</sub>H<sub>28</sub>BrNNaO] [M+Na]<sup>+</sup>: 520.1246, found: 520.1240.

4. **(1R,5R)-5-(4-bromophenyl)-2-butyl-2'-(4-*tert*-butylphenyl)spiro[cyclopentane-1,3'-indol]-2-en-4-one (3d)**

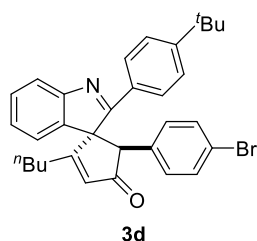

The general procedure was followed using **1a** (122.0 mg, 0.4 mmol, 2.0 equiv.) and **2d** (50.0 mg, 0.2 mmol, 1.0 equiv.), Cu(OTf)<sub>2</sub> (7.2 mg, 10 mol%), 3,4,7,8-tetramethyl-1,10-phenanthroline (7.1 mg, 15 mol%) and 4 mL DCM by **GP-1**, TLC (*R<sub>f</sub>* = 0.4, PE/EA = 10:1). After purification by column chromatography (PE/EA = 50:1 to 20:1), **3d** (dr = 3.3:1, 31.7 mg, 30%) was obtained as yellow oil: Two diastereoisomers are hard to be separated by column

chromatography on silica gel, following column chromatography separation, the second diastereomer is scarcely discernible in the NMR spectrum. **<sup>1</sup>H NMR (500 MHz, CDCl<sub>3</sub>)** δ 7.97 (d, *J* = 8.5 Hz, 2H), 7.55 (d, *J* = 8.5 Hz, 2H), 7.51 (d, *J* = 7.8 Hz, 1H), 7.22 (t, *J* = 7.6 Hz, 1H), 7.10 (d, *J* = 8.4 Hz, 2H), 7.02 (t, *J* = 7.5 Hz, 1H), 6.83 (d, *J* = 7.5 Hz, 1H), 6.61 (d, *J* = 8.0 Hz, 2H), 6.57 (s, 1H), 4.47 (s, 1H), 2.11 – 2.05 (m, 1H), 1.70 – 1.66 (m, 1H), 1.64 (d, *J* = 3.2 Hz, 1H), 1.51 – 1.44 (m, 2H), 1.38 (s, 9H), 1.19 – 1.15 (m, 2H), 0.75 (t, *J* = 7.3 Hz, 3H); **<sup>13</sup>C NMR (125 MHz, CDCl<sub>3</sub>)** δ 204.4, 181.4, 177.7, 156.0, 138.0, 134.8, 132.8, 131.8, 131.7, 131.0, 130.4, 129.4, 129.2, 127.3, 126.5, 125.6, 123.0, 121.0, 73.1, 61.0, 34.4, 31.1, 29.7, 27.4, 22.1, 14.5; **HRMS** (ESI) calculated for [C<sub>32</sub>H<sub>32</sub>BrNNaO] [M+Na]<sup>+</sup>: 548.1559, found: 548.1547.

5. **(1*R*,5*R*)-5-(4-bromophenyl)-2-butyl-2'-(4-methoxyphenyl)spiro[cyclopentane-1,3'-indol]-2-en-4-one (3e)**

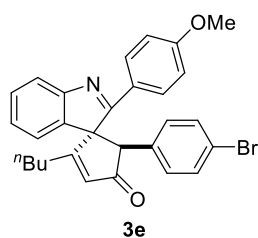

The general procedure was followed using **1a** (119.9 mg, 0.4 mmol, 2.0 equiv.) and **2e** (45.1 mg, 0.2 mmol, 1.0 equiv.), Cu(OTf)<sub>2</sub> (7.2 mg, 10 mol%), 3,4,7,8-tetramethyl-1,10-phenanthroline (7.1 mg, 15 mol%) and 4 mL DCM by **GP-1**, TLC (*R<sub>f</sub>* = 0.3, PE/EA = 10:1). After purification by column chromatography (PE/EA = 60:1 to 30:1), **3e** (dr = 7.0:1, 85.6 mg, 85%) was obtained as yellow oil: Two diastereoisomers are hard to be separated by column chromatography on silica gel. <sup>1</sup>H NMR (500 MHz, CDCl<sub>3</sub>) δ [7.75 (d, *J* = 7.6 Hz, 0.1H), 7.52 (d, *J* = 7.6 Hz, 1.8H), 7.50 – 7.48 (m, 0.1H)], [7.71 – 7.69 (m, 0.9H), 7.34 – 7.31 (m, 0.1H)], [7.43 (t, *J* = 7.9 Hz, 0.9H), 7.39 (t, *J* = 7.9 Hz, 0.1H)], [7.25 – 7.21 (m, 0.9H), 6.98 – 6.96 (m, 0.1H)], 7.15 – 7.07 (m, 3H), [7.07 – 7.03 (m, 0.9H), 6.90 – 6.87 (m, 0.1H)], [6.97 (d, *J* = 7.6 Hz, 0.1H), 6.85 (d, *J* = 7.6 Hz, 0.9H)], [6.79 (s, 0.1H), 6.57 (s, 0.9H)], [6.61 (d, *J* = 8.5 Hz, 1.8H), 6.34 (d, *J* = 8.5 Hz, 2H)], [4.50 (s, 0.9H), 4.34 (s, 0.1H)], [3.92 (s, 2.7H), 3.72 (s, 0.3H)], 2.13 – 2.01 (m, 1H), 1.70 – 1.63 (m, 1H), 1.53 – 1.37 (m, 2H), 1.21 – 1.13 (m, 2H), [0.78 (t, *J* = 7.3 Hz, 0.3H), 0.74 (t, *J* = 7.3 Hz, 2.7H)]; <sup>13</sup>C NMR (125 MHz, CDCl<sub>3</sub>) δ 204.2, 181.1, 176.3, 160.4, 154.6, 138.0, 133.6, [132.6, 131.5], [131.0, 130.7], [130.4, 129.8], [129.5, 129.4], [129.2, 129.1], [127.2, 125.9], [123.0, 121.6], [121.2, 121.1], [119.8, 119.6], [118.1, 117.6], [112.2, 111.9], 73.6, [60.0, 59.5], [55.5, 55.2], [29.5, 29.2], [28.9, 28.7], [22.2, 22.0], 13.6; HRMS (ESI) calculated for [C<sub>29</sub>H<sub>26</sub>BrNNaO<sub>2</sub>] [M+Na]<sup>+</sup>: 522.1039, found: 522.1037.

6. **(1*R*,5*R*)-5-(4-bromophenyl)-2-butyl-2'-(4-chlorophenyl)spiro[cyclopentane-1,3'-indol]-2-en-4-one (3f)**

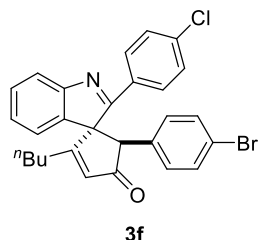

The general procedure was followed using **1a** (127.1 mg, 0.4 mmol, 2.0 equiv.) and **2f** (45.0 mg, 0.2 mmol, 1.0 equiv.), Cu(OTf)<sub>2</sub> (7.2 mg, 10 mol%), 3,4,7,8-tetramethyl-1,10-phenanthroline (7.1 mg, 15 mol%) and 4 mL DCM by **GP-1**, TLC (*R<sub>f</sub>* = 0.4, PE/EA = 10:1). After purification by column chromatography (PE/EA = 50:1 to 20:1), **3f** (dr = 4.8:1, 39.8 mg, 40%) was obtained as yellow oil: Two diastereoisomers are hard to be separated by column chromatography on silica gel. <sup>1</sup>H NMR (500 MHz, CDCl<sub>3</sub>) δ [8.06 – 8.03 (m, 1.8H), 7.72 – 7.69

(m, 0.2H)], [7.57 – 7.52 (m, 3.6H), 7.40 – 7.34 (m, 0.4H)], 7.25 – 7.21 (m, 1H), [7.10 (d,  $J = 8.5$  Hz, 1.8H), 6.94 (d,  $J = 8.5$  Hz, 0.2H)], 7.07 – 7.02 (m, 1H), [7.19 – 7.17 (m, 0.1H), 6.85 (d,  $J = 7.0$  Hz, 0.9H)], [6.60 (d,  $J = 8.4$  Hz, 1.8H), 6.34 (d,  $J = 8.4$  Hz, 0.2H)], 6.58 (s, 1H), [4.47 (s, 0.9H), 4.36 (s, 0.1H)], 2.11 – 2.03 (m, 1H), 1.70 – 1.64 (m, 1H), 1.49 – 1.41 (m, 2H), 1.21 – 1.14 (m, 2H), [0.79 – 0.77 (m, 0.3H), 0.74 (t,  $J = 7.3$  Hz, 2.7H)];  $^{13}\text{C}$  NMR (125 MHz,  $\text{CDCl}_3$ )  $\delta$  204.3, 181.1, 176.4, 154.7, 137.9, 132.6, 132.3, 131.8, 131.0, 130.4, 129.5, 129.4, 129.2, 127.4, 125.8, 123.0, 121.2, 121.1, 73.5, 59.9, 29.5, 28.7, 22.0, 13.6; MALDI-MS calculated for  $[\text{C}_{28}\text{H}_{24}\text{BrClNO}]$   $[\text{M}+\text{H}]^+$ : 504.0730, found: 503.9740.

7. **(1*R*,5*R*)-5-(4-bromophenyl)-2-butyl-2'-(3-chlorophenyl)spiro[cyclopentane-1,3'-indol]-2-en-4-one (3g)**

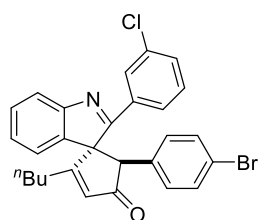

**3g**

The general procedure was followed using **1a** (125.1 mg, 0.4 mmol, 2.0 equiv.) and **2g** (45.8 mg, 0.2 mmol, 1.0 equiv.),  $\text{Cu}(\text{OTf})_2$  (7.2 mg, 10 mol%), 3,4,7,8-tetramethyl-1,10-phenanthroline (7.1 mg, 15 mol%) and 4 mL DCM by **GP-1**, TLC ( $R_f = 0.3$ , PE/EA = 10:1). After purification by column chromatography (PE/EA = 50:1 to 20:1), **3g** (dr = 4.8:1, 70.2 mg,

68%) was obtained as yellow oil: Two diastereoisomers are hard to be separated by column chromatography on silica gel.  $^1\text{H}$  NMR (500 MHz,  $\text{CDCl}_3$ )  $\delta$  [8.17 (s, 0.9H), 8.06 – 8.04 (m, 0.1H)], [7.82 (d,  $J = 7.8$  Hz, 0.9H), 7.77 – 7.74 (m, 0.1H)], 7.54 (t,  $J = 6.6$  Hz, 2H), 7.47 (t,  $J = 7.9$  Hz, 1H), 7.24 (d,  $J = 8.9$  Hz, 1H), [7.11 (d,  $J = 8.4$  Hz, 1.8H), 7.01 (d,  $J = 8.4$  Hz, 0.2H)], 7.07 (t,  $J = 7.5$  Hz, 1H), [7.41 – 7.31 (m, 0.1H), 6.85 (d,  $J = 7.5$  Hz, 0.9H)], [6.60 (d,  $J = 4.0$  Hz, 1.8H), 6.37 – 6.35 (m, 0.2H)], [6.63 (s, 0.1H), 6.59 (s, 0.9H)], [4.43 (s, 0.9H), 4.36 (s, 0.1H)], 2.07 – 1.99 (m, 1H), 1.70 – 1.63 (m, 1H), 1.50 – 1.39 (m, 2H), 1.20 – 1.15 (m, 2H), [0.80 – 0.78 (m, 0.3H), 0.75 (t,  $J = 7.4$  Hz, 2.7H)];  $^{13}\text{C}$  NMR (125 MHz,  $\text{CDCl}_3$ )  $\delta$  203.9, 180.6, 175.0, 154.4, 138.0, 135.8, 134.0, 132.5, 131.8, 131.1, 130.7, 130.4, 129.8, 129.4, 127.6, 126.3, 125.1, 123.1, 121.5, 121.3, 73.5, 59.6, 29.7, 28.7, 22.0, 13.6; HRMS (ESI) calculated for  $[\text{C}_{28}\text{H}_{23}\text{BrClNNaO}]$   $[\text{M}+\text{Na}]^+$ : 526.0544, found: 526.0557.

8. **(1*R*,5*R*)-5-(4-bromophenyl)-2-butyl-2'-(2-chlorophenyl)spiro[cyclopentane-1,3'-indol]-2-en-4-one (3h)**

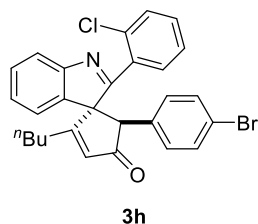

The general procedure was followed using **1a** (118.5 mg, 0.4 mmol, 2.0 equiv.) and **2h** (43.9 mg, 0.2 mmol, 1.0 equiv.), Cu(OTf)<sub>2</sub> (7.3 mg, 10 mol%), 3,4,7,8-tetramethyl-1,10-phenanthroline (7.1 mg, 15 mol%) and 4 mL DCM by **GP-1**, TLC (*R<sub>f</sub>* = 0.3, PE/EA = 10:1). After purification by column chromatography (PE/EA = 60:1 to 30:1), **3h** (dr = 5.4:1, 93 mg,

96%) was obtained as yellow oil: Two diastereoisomers are hard to be separated by column chromatography on silica gel. **<sup>1</sup>H NMR (500 MHz, CDCl<sub>3</sub>)** δ [8.06 – 8.04 (m, 1.8H), 7.76 – 7.73 (m, 0.1H), 7.51 – 7.48 (m, 0.1H)], [7.57 – 7.51 (m, 3.6H), 7.39 – 7.33 (m, 0.4H)], [7.32 – 7.30 (m, 0.1H), 7.25 – 7.21 (m, 0.9H)], [7.10 (d, *J* = 8.5 Hz, 1.8H), 6.94 (d, *J* = 8.5 Hz, 0.2H)], 7.04 (t, *J* = 7.5 Hz, 1H), [7.18 (d, *J* = 7.1 Hz, 0.1H), 6.85 (d, *J* = 7.1 Hz, 0.9H)], 6.61 (s, 1H), [6.59 (d, *J* = 7.9 Hz, 1.8H), 6.34 (d, *J* = 7.9 Hz, 0.2H)], [4.47 (s, 0.9H), 4.37 (s, 0.1H)], 2.11 – 2.03 (m, 1H), 1.71 – 1.64 (m, 1H), 1.52 – 1.39 (m, 2H), 1.21 – 1.12 (m, 2H), [0.79 – 0.77 (m, 0.3H), 0.74 (t, *J* = 7.3 Hz, 2.7H)]; **<sup>13</sup>C NMR (125 MHz, CDCl<sub>3</sub>)** δ 204.2, 181.1, 176.4, 154.7, 137.9, 132.6, 132.3, 131.8, 131.0, 130.4, 129.4, 129.4, 129.2, 127.4, 125.8, 123.0, 121.2, 121.1, 73.5, 59.9, 29.5, 28.7, 22.0, 13.6; **MALDI-MS** calculated for [C<sub>28</sub>H<sub>24</sub>BrClNO] [M+H]<sup>+</sup>: 504.0730, found: 504.0050.

9. **(1R,5R)-5-(4-bromophenyl)-2-butyl-2'-(thiophen-3-yl)spiro[cyclopentane-1,3'-indol]-2-en-4-one (3i)**

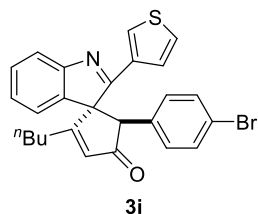

The general procedure was followed using **1a** (113.0 mg, 0.4 mmol, 2.0 equiv.) and **2i** (36.2 mg, 0.2 mmol, 1.0 equiv.), Cu(OTf)<sub>2</sub> (7.2 mg, 10 mol%), 3,4,7,8-tetramethyl-1,10-phenanthroline (7.1 mg, 15 mol%) and 4 mL DCM by **GP-1**, TLC (*R<sub>f</sub>* = 0.3, PE/EA = 10:1). After purification by

column chromatography (PE/EA = 60:1 to 30:1), **3i** (dr = 4.7:1, 70.4 mg, 81%) was obtained as yellow oil: Two diastereoisomers are hard to be separated by column chromatography on silica gel. **<sup>1</sup>H NMR (500 MHz, CDCl<sub>3</sub>)** δ [7.91 – 7.90 (m, 0.9H), 7.72 – 7.68 (m, 0.1H)], [7.84 – 7.81 (m, 0.9H), 7.48 – 7.46 (m, 0.1H)], [7.52 – 7.48 (m, 1.8H), 7.40 – 7.32 (m, 0.2H)], 7.24 – 7.19 (m, 1H), [7.18 – 7.15 (m, 0.2H), 7.11 (d, *J* = 8.5 Hz, 1.8H)], 7.02 – 6.98 (m, 1H), [7.04 – 7.02 (m, 0.1H), 6.79 (d, *J* = 7.5 Hz, 0.9H)], [6.63 (d, *J* = 8.5 Hz, 1.8H), 6.37 (d, *J* = 8.5 Hz, 0.2H)], 6.58 (s, 1H), [4.49 (s, 0.9H), 4.36 (s, 0.1H)], 2.04 – 1.95 (m, 1H), 1.68 – 1.62 (m, 1H), 1.48 – 1.37 (m, 2H), 1.19 – 1.12 (m, 2H), [0.79 – 0.76 (m, 0.3H), 0.74 (t, *J* = 7.4 Hz, 2.7H)]; **<sup>13</sup>C NMR (125 MHz, CDCl<sub>3</sub>)** δ



204.4, [181.0, 179.4], 172.6, 155.1, 137.4, 134.9, 132.9, [131.0, 130.8], 130.3, [130.0, 129.6], 129.2, 127.3, 127.0, 126.9, [125.8, 125.6], 123.1, 121.1, 121.0, 73.6, 60.1, 29.5, 28.7, 22.0, 13.6; **HRMS** (ESI) calculated for  $[C_{26}H_{22}BrNNaOS]$   $[M+Na]^+$ : 498.0498, found: 498.0497.

10. **(1*R*,5*R*)-5-(4-bromophenyl)-2-butyl-5'-methyl-2'-phenylspiro[cyclopentane-1,3'-indol]-2-en-4-one (3j)**

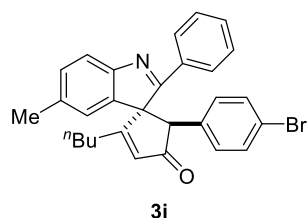

The general procedure was followed using **1a** (122.0 mg, 0.4 mmol, 2.0 equiv.) and **2j** (40.7 mg, 0.2 mmol, 1.0 equiv.),  $Cu(OTf)_2$  (7.2 mg, 10 mol%), 3,4,7,8-tetramethyl-1,10-phenanthroline (7.1 mg, 15 mol%) and 4 mL DCM by **GP-1**, TLC ( $R_f$  = 0.3, PE/EA = 10:1). After purification by column chromatography (PE/EA = 50:1 to 20:1), **3j** (dr = 3.0:1, 55.6 mg, 58%) was obtained as yellow oil : Two diastereoisomers are hard to be separated by column chromatography on silica gel, following column chromatography separation, the second diastereomer is scarcely discernible in the NMR spectrum.  **$^1H$  NMR (600 MHz,  $CDCl_3$ )**  $\delta$  [8.03 (d,  $J$  = 5.4 Hz, 1.8H), 7.61 – 7.63 (m, 0.2H), 7.29 – 7.31 (m, 0.2H)], [7.51 – 7.55 (m, 2.4H), 7.15 – 7.19 (m, 0.6H)], [7.39 (d,  $J$  = 7.8 Hz, 0.8H), 7.34 (d,  $J$  = 7.7 Hz, 0.2H)], 7.10 (d,  $J$  = 8.3 Hz, 2H), [7.28 – 7.30 (m, 0.2H), 7.02 (d,  $J$  = 7.8 Hz, 0.8H)], [6.93 (d,  $J$  = 8.3 Hz, 0.4H), 6.63 (s, 0.8H), 6.57 (s, 1H)], 6.60 (d,  $J$  = 8.1 Hz, 2H), [4.46 (s, 0.8H), 4.34 (s, 0.2H)], [2.47 (s, 0.6H), 2.25 (s, 2.4H)], 2.10 – 2.04 (m, 1H), 1.76 – 1.64 (m, 1H), 1.53 – 1.42 (m, 2H), 1.14 – 1.22 (m, 2H), 0.73 – 0.78 (m, 3H);  **$^{13}C$  NMR (150 MHz,  $CDCl_3$ )**  $\delta$  [205.1, 204.3], [181.2, 180.1], [175.9, 175.3], [152.6, 142.0], [138.0, 137.2], [135.8, 134.7], [132.9, 132.7], 132.4, [131.5, 131.2], [130.9, 130.7], [130.4, 130.1], [129.8, 129.7], [129.4, 129.2], 128.1, [127.4, 127.3], [123.6, 121.8], [121.1, 121.1], [120.9, 120.7], [73.7, 73.3], [60.3, 59.9], [29.5, 29.2], [28.8, 28.6], [22.1, 22.0], [21.6, 21.4], [14.2, 13.5]; **HRMS** (ESI) calculated for  $[C_{29}H_{26}BrNNaO]$   $[M+Na]^+$ : 506.1090, found: 506.1093.

11. **(1*R*,5*R*)-5-(4-bromophenyl)-2-butyl-6'-methyl-2'-phenylspiro[cyclopentane-1,3'-indol]-2-en-4-one (3k)**

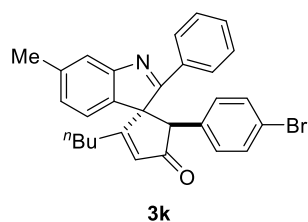

The general procedure was followed using **1a** (118.4 mg, 0.4 mmol, 2.0 equiv.) and **2k** (37.0 mg, 0.2 mmol, 1.0 equiv.),  $Cu(OTf)_2$  (7.2 mg, 10 mol%), 3,4,7,8-tetramethyl-1,10-phenanthroline (7.0 mg, 15 mol%) and 4 mL DCM by **GP-1**, TLC ( $R_f$  = 0.3, PE/EA = 10:1). After

purification by column chromatography (PE/EA = 60:1 to 30:1), **3k** (dr = 5.0:1, 72.1 mg, 83%) was obtained as yellow solid: Two diastereoisomers are hard to be separated by column chromatography on silica gel. **<sup>1</sup>H NMR (500 MHz, CDCl<sub>3</sub>)** δ [8.04 – 8.00 (m, 1.84H), 7.49 – 7.46 (m, 0.16H)], 7.54 (q, *J* = 7.1, 6.3 Hz, 3H), 7.33 (s, 1H), [7.11 (d, *J* = 8.4 Hz, 1.84H), 6.93 (d, *J* = 8.4 Hz, 0.16H)], 6.85 (d, *J* = 7.0 Hz, 1H), 6.72 (d, *J* = 7.6 Hz, 1H), [6.60 (d, *J* = 8.4 Hz, 1.84H), 6.35 (d, *J* = 8.4 Hz, 0.16H)], 6.55 (s, 1H), [4.45 (s, 0.92H), 4.34 (s, 0.08H)], [2.50 (s, 0.24H), 2.32 (s, 2.76H)], 2.08 – 2.01 (m, 1H), 1.70 – 1.63 (m, 1H), 1.51 – 1.39 (m, 2H), 1.13 – 1.20 (m, 2H), [0.80 – 0.77 (m, 0.24H), 0.75 (t, *J* = 7.4 Hz, 2.76H)]; **<sup>13</sup>C NMR (125 MHz, CDCl<sub>3</sub>)** δ 204.4, 181.4, 176.5, 155.0, 139.2, 134.8, 132.8, 132.5, 131.6, 131.0, 130.4, 129.4, 129.1, 127.4, 126.7, 122.7, 121.9, 121.1, 73.2, 59.8, 29.4, 28.7, 22.0, 21.5, 13.6; m.p. = 119.5 – 129.9 °C; **HRMS** (ESI) calculated for [C<sub>29</sub>H<sub>26</sub>BrNNaO] [M+Na]<sup>+</sup>: 506.1090, found: 506.1082.

## 12. (1*R*,5*R*)-2-butyl-2',5-diphenylspiro[cyclopentane-1,3'-indol]-2-en-4-one (**3l**)

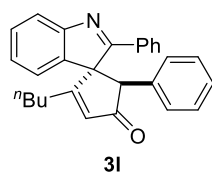

The general procedure was followed using **1l** (90.5 mg, 0.4 mmol, 2.0 equiv.) and **2a** (37.5 mg, 0.2 mmol, 1.0 equiv.), Cu(OTf)<sub>2</sub> (7.3 mg, 10 mol%), 3,4,7,8-tetramethyl-1,10-phenanthroline (7.1 mg, 15 mol%) and 4 mL DCM by **GP-1**, TLC (*R<sub>f</sub>* = 0.3, PE/EA = 10:1). After purification by column chromatography

(PE/EA = 30:1), **3l** (dr = 6.0:1, 63 mg, 83%) was obtained as yellow oil: Two diastereoisomers are hard to be separated by column chromatography on silica gel, following column chromatography separation, the second diastereomer is scarcely discernible in the NMR spectrum. **<sup>1</sup>H NMR (500 MHz, CDCl<sub>3</sub>)** δ 8.09 – 8.03 (m, 2H), 7.58 – 7.51 (m, 4H), 7.22 (t, *J* = 7.5 Hz, 1H), 7.07 (q, *J* = 7.7 Hz, 2H), 6.94 (s, 1H), 6.87 – 6.80 (m, 2H), 6.60 (d, *J* = 11.9 Hz, 2H), 4.47 (s, 1H), 2.11 – 2.03 (m, 1H), 1.72 – 1.65 (m, 1H), 1.50 – 1.39 (m, 2H), 1.20 – 1.13 (m, 2H), 0.74 (t, *J* = 7.3 Hz, 3H); **<sup>13</sup>C NMR (125 MHz, CDCl<sub>3</sub>)** δ 204.0, 181.2, 176.3, 154.7, 137.8, 135.9, 132.3, 131.8, 131.6, 130.2, 129.5, 129.5, 129.4, 129.2, 127.4, 127.3, 125.7, 123.1, 121.9, 121.1, 73.6, 59.7, 29.5, 28.7, 22.0, 13.6; **MALDI-MS** calculated for [C<sub>28</sub>H<sub>26</sub>NO] [M+H]<sup>+</sup>: 414.1834, found: 414.1710.

## 13. (1*R*,5*R*)-2-butyl-2'-phenyl-5-(*p*-tolyl)spiro[cyclopentane-1,3'-indol]-2-en-4-one (**3m**)

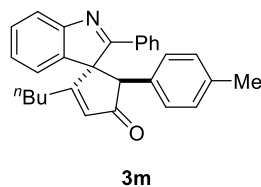

The general procedure was followed using **1m** (99.0 mg, 0.4 mmol, 2.0 equiv.) and **2a** (37.5 mg, 0.2 mmol, 1.0 equiv.), Cu(OTf)<sub>2</sub> (7.2 mg, 10 mol%), 3,4,7,8-tetramethyl-1,10-phenanthroline (7.1 mg, 15 mol%) and 4 mL DCM by **GP-1**, TLC (*R<sub>f</sub>* = 0.3, PE/EA = 10:1). After purification by column chromatography (PE/EA = 50:1 to 20:1), **3m** (dr = 10:1, 62.4 mg, 79%) was obtained as yellow oil: Two diastereoisomers are hard to be separated by column chromatography on silica gel, nevertheless, following column chromatography separation, the second diastereomer is scarcely discernible in the NMR spectrum. <sup>1</sup>H NMR (500 MHz, CDCl<sub>3</sub>) δ 8.06 (d, *J* = 6.2 Hz, 2H), 7.56 – 7.49 (m, 4H), 7.20 (t, *J* = 7.6 Hz, 1H), 7.03 (t, *J* = 7.5 Hz, 1H), 6.89 (d, *J* = 7.5 Hz, 1H), 6.77 (d, *J* = 7.7 Hz, 2H), 6.60 (d, *J* = 7.7 Hz, 2H), 6.58 (s, 1H), 4.50 (s, 1H), 2.09 (s, 3H), 2.07 – 2.02 (m, 1H), 1.70 – 1.63 (m, 1H), 1.50 – 1.41 (m, 2H), 1.19 – 1.14 (m, 2H), 0.74 (t, *J* = 7.3 Hz, 3H). <sup>13</sup>C NMR (125 MHz, CDCl<sub>3</sub>) δ 205.2, 180.9, 176.7, 154.8, 138.3, 136.5, 132.6, 131.6, 130.5, 129.6, 129.3, 128.8, 128.6, 128.6, 127.5, 125.6, 123.3, 120.9, 73.9, 60.4, 29.5, 28.7, 22.0, 20.9, 13.6; HRMS (ESI) calculated for [C<sub>29</sub>H<sub>27</sub>NNaO] [M+Na]<sup>+</sup>: 428.1985, found: 428.1995.

#### 14. (1*R*,5*R*)-2-butyl-2'-phenyl-5-(*m*-tolyl)spiro[cyclopentane-1,3'-indol]-2-en-4-one (**3n**)

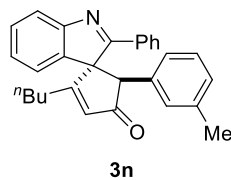

The general procedure was followed using **1n** (96.2 mg, 0.4 mmol, 2.0 equiv.) and **2a** (38.9 mg, 0.2 mmol, 1.0 equiv.), Cu(OTf)<sub>2</sub> (7.3 mg, 10 mol%), 3,4,7,8-tetramethyl-1,10-phenanthroline (7.1 mg, 15 mol%) and 4 mL DCM by **GP-1**, TLC (*R<sub>f</sub>* = 0.3, PE/EA = 10:1). After purification by column chromatography (PE/EA = 50:1 to 20:1), **3n** (dr = 3.6:1, 67.0 mg, 83%) was obtained as yellow oil: Two diastereoisomers are hard to be separated by column chromatography on silica gel. <sup>1</sup>H NMR (500 MHz, CDCl<sub>3</sub>) δ [8.06 (d, *J* = 7.2 Hz, 1.8H), 7.75 – 7.72 (m, 0.1H), 7.40 – 7.37 (m, 0.1H)], [7.57 – 7.48 (m, 3.6H), 7.36 – 7.30 (m, 0.4H)], 7.18 (q, *J* = 7.4 Hz, 1H), [7.15 – 7.11 (m, 0.1H), 7.01 (t, *J* = 7.5 Hz, 0.9H)], 6.92 – 6.78 (m, 2H), [6.75 (d, *J* = 7.7 Hz, 0.9H), 6.72 – 6.69 (m, 0.1H)], [6.62 (s, 0.1H), 6.59 (s, 0.9H)], [6.55 (s, 1H), 6.29 (s, 0.1H)], [6.50 (d, *J* = 7.7 Hz, 0.9H), 6.22 (d, *J* = 7.7 Hz, 0.1H)], [4.49 (s, 0.9H), 4.39 (s, 0.1H)], [2.08 (s, 2.7H), 1.91 (s, 0.3H)], 2.03 (d, *J* = 9.4 Hz, 1H), 1.71 – 1.64 (m, 1H), 1.52 – 1.39 (m, 2H), 1.17 (q, *J* = 7.9 Hz, 2H), [0.80 – 0.77 (m, 0.3H), 0.74 (t, *J* = 7.4 Hz, 2.7H)]; <sup>13</sup>C NMR (125 MHz, CDCl<sub>3</sub>) δ 205.2, 181.0, 176.7, 154.8, 138.2, 137.3, 133.6, 132.6, 131.6, 129.7, 129.4, 129.4, 128.8, 127.7, 127.7, 127.5, 125.7, 125.4, 123.4, 120.8, 73.9, 60.4,

29.5, 28.7, 22.0, 21.2, 13.6; **HRMS** (ESI) calculated for  $[C_{29}H_{27}NNaO] [M+Na]^+$ : 428.1985, found: 428.1996.

15. **(1*R*,5*R*)-2-butyl-5-(4-methoxyphenyl)-2'-phenylspiro[cyclopentane-1,3'-indol]-2-en-4-one**

**(3o)**

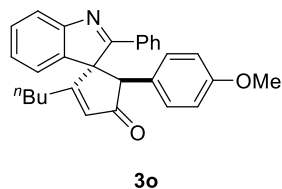

The general procedure was followed using **1o** (107.8 mg, 0.4 mmol, 2.0 equiv.) and **2a** (36.0 mg, 0.2 mmol, 1.0 equiv.), Cu(OTf)<sub>2</sub> (7.3 mg, 10 mol%), 3,4,7,8-tetramethyl-1,10-phenanthroline (7.0 mg, 15 mol%) and 4 mL DCM by **GP-1**, TLC ( $R_f$  = 0.3, PE/EA = 10:1). After purification

by column chromatography (PE/EA = 60:1 to 30:1), **3o** (dr = 6.0:1, 57.2 mg, 73%) was obtained as yellow oil: Two diastereoisomers are hard to be separated by column chromatography on silica gel.

**<sup>1</sup>H NMR (600 MHz, CDCl<sub>3</sub>)**  $\delta$  [8.07 – 8.04 (m, 1.8H), 7.75 – 7.72 (m, 0.1H), 7.50 – 7.47 (m, 0.1H)], [7.56 – 7.50 (m, 3.6H), 7.40 – 7.35 (m, 0.4H)], [7.33 – 7.30 (m, 0.1H), 7.22 – 7.19 (m, 0.9H), 7.05 – 7.02 (m, 1H), [7.19 – 7.15 (m, 0.1H), 6.88 (d,  $J$  = 7.3, 0.9H)], [6.64 (d,  $J$  = 8.7 Hz, 1.8H), 6.39 (d,  $J$  = 8.7 Hz, 0.2H)], [6.61 (s, 0.1H), 6.58 (s, 0.9H)], [6.51 (d,  $J$  = 8.7 Hz, 1.8H), 6.36 (d,  $J$  = 8.7 Hz, 0.2H)], [4.50 (s, 0.9H), 4.40 (s, 0.1H)], 3.60 (s, 3H), 2.10 – 2.03 (m, 1H), 1.70 – 1.65 (m, 1H), 1.50 – 1.40 (m, 2H), 1.20 – 1.14 (m, 2H), [0.79 – 0.77 (m, 0.3H), 0.74 (t,  $J$  = 7.3 Hz, 2.7H)]; **<sup>13</sup>C NMR (150 MHz, CDCl<sub>3</sub>)**  $\delta$  205.2, 180.8, 176.7, 158.3, 154.8, 138.3, 132.5, 131.6, 129.8, 129.5, 129.4, 128.9, 127.4, 125.7, 125.6, 123.2, 120.9, 113.3, 74.0, 60.2, 55.0, 29.6, 28.7, 22.0, 13.6; **HRMS** (ESI) calculated for  $[C_{29}H_{27}NNaO_2] [M+Na]^+$ : 444.1934, found: 444.1945.

16. **(1*R*,5*R*)-5-(3-bromophenyl)-2-butyl-2'-phenylspiro[cyclopentane-1,3'-indol]-2-en-4-one**

**(3p)**

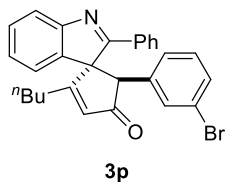

The general procedure was followed using **1p** (122.1 mg, 0.4 mmol, 2.0 equiv.) and **2a** (37.1 mg, 0.2 mmol, 1.0 equiv.), Cu(OTf)<sub>2</sub> (7.3 mg, 10 mol%), 3,4,7,8-tetramethyl-1,10-phenanthroline (7.1 mg, 15 mol%) and 4 mL DCM by **GP-1**, TLC ( $R_f$  = 0.3, PE/EA = 10:1). After purification by column

chromatography (PE/EA = 50:1 to 20:1), **3p** (dr = 6.3:1, 67.6 mg, 75%) was obtained as yellow oil:

Two diastereoisomers are hard to be separated by column chromatography on silica gel. **<sup>1</sup>H NMR (600 MHz, CDCl<sub>3</sub>)**  $\delta$  [8.08 – 8.03 (m, 1.8H), 7.75 (d,  $J$  = 7.7 Hz, 0.1H), 7.50 (d,  $J$  = 7.7 Hz, 0.1H)], [7.59 – 7.52 (m, 3.6H), 7.36 – 7.30 (m, 0.4H)], [7.40 – 7.36 (m, 0.1H), 7.24 – 7.21 (m, 0.9H)], [7.21

– 7.18 (m, 0.2H), 7.09 – 7.07 (m, 0.8H)], 7.07 – 7.02 (m, 1H), [6.94 (t,  $J$  = 1.9 Hz, 0.9H), 6.66 (t,  $J$  = 1.9 Hz, 0.1H)], 6.85 (d,  $J$  = 7.1 Hz, 1H), [6.83 (t,  $J$  = 7.9 Hz, 0.9H), 6.71 (t,  $J$  = 7.9 Hz, 0.1H)], [6.60 (d,  $J$  = 7.9 Hz, 0.9H), 6.35 (d,  $J$  = 7.9 Hz, 0.1H)], [6.63 (t,  $J$  = 1.6 Hz, 0.1H), 6.59 (t,  $J$  = 1.6 Hz, 0.9H)], [4.47 (s, 0.9H), 4.37 (s, 0.1H)], 2.10 – 2.04 (m, 1H), 1.71 – 1.65 (m, 1H), 1.52 – 1.40 (m, 2H), 1.22 – 1.14 (m, 2H), [0.78 (t,  $J$  = 7.3 Hz, 0.3H), 0.74 (t,  $J$  = 7.3 Hz, 2.7H)];  $^{13}\text{C}$  NMR (125 MHz,  $\text{CDCl}_3$ )  $\delta$  204.1, 181.2, 176.3, 154.7, 137.8, 135.9, 132.3, 131.8, 131.6, 130.2, 129.5, 129.5, 129.4, 129.2, 127.4, 127.3, 125.7, 123.1, 121.8, 121.1, 73.6, 59.7, 29.5, 28.7, 22.0, 13.6; HRMS (ESI) calculated for  $[\text{C}_{28}\text{H}_{24}\text{BrNNaO}]$   $[\text{M}+\text{Na}]^+$ : 492.0933, found: 492.0930.

17. **(1*R*,5*R*)-2-butyl-5-(4-chlorophenyl)-2'-phenylspiro[cyclopentane-1,3'-indol]-2-en-4-one (3q)**

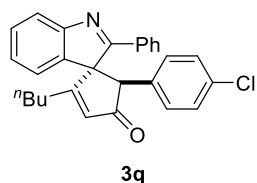

The general procedure was followed using **1q** (103.4 mg, 0.4 mmol, 2.0 equiv.) and **2a** (37.1 mg, 0.2 mmol, 1.0 equiv.),  $\text{Cu}(\text{OTf})_2$  (7.3 mg, 10 mol%), 3,4,7,8-tetramethyl-1,10-phenanthroline (7.1 mg, 15 mol%) and 4 mL DCM by **GP-1**, TLC ( $R_f$  = 0.3, PE/EA = 10:1). After purification by

column chromatography (PE/EA = 60:1 to 30:1), **3q** (dr = 8.4:1, 81.5 mg, 82%) was obtained as yellow oil: Two diastereoisomers are hard to be separated by column chromatography on silica gel.

$^1\text{H}$  NMR (600 MHz,  $\text{CDCl}_3$ )  $\delta$  [8.07 – 8.04 (m, 1.8H), 7.76 – 7.74 (m, 0.1H), 7.50 – 7.49 (m, 0.1H)], [7.58 – 7.51 (m, 3.6H), 7.40 – 7.35 (m, 0.4H)], 7.25 – 7.21 (m, 1H), 7.04 (t,  $J$  = 7.5 Hz, 1H), [6.95 (d,  $J$  = 8.5 Hz, 1.8H), 6.79 (d,  $J$  = 8.5 Hz, 0.2H)], 6.85 (d,  $J$  = 7.5 Hz, 1H), [6.66 (d,  $J$  = 8.5 Hz, 1.8H), 6.40 (d,  $J$  = 8.5 Hz, 0.2H)], [6.62 (s, 0.1H), 6.58 (s, 0.9H)], [4.49 (s, 0.9H), 4.38 (s, 0.1H)], 2.10 – 2.04 (m, 1H), 1.71 – 1.65 (m, 1H), 1.50 – 1.39 (m, 2H), 1.19 – 1.14 (m, 2H), [0.79 – 0.77 (m, 0.3H), 0.74 (t,  $J$  = 7.3 Hz, 2.7H)];  $^{13}\text{C}$  NMR (125 MHz,  $\text{CDCl}_3$ )  $\delta$  204.3, 181.1, 176.4, 154.7, 137.9, 132.9, 132.3, 132.1, 131.8, 130.0, 129.4, 129.4, 129.2, 128.1, 127.4, 125.8, 123.0, 121.1, 73.6, 59.8, 29.5, 28.7, 22.0, 13.6; HRMS (ESI) calculated for  $[\text{C}_{28}\text{H}_{24}\text{ClNNaO}]$   $[\text{M}+\text{Na}]^+$ : 448.1439, found: 448.1437.

18. **(1*R*,5*R*)-5-(4-chlorophenyl)-2-methyl-2'-phenylspiro[cyclopentane-1,3'-indol]-2-en-4-one (3r)**

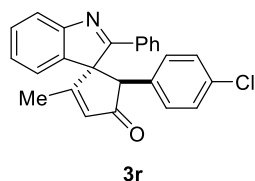

The general procedure was followed using **1r** (94.8 mg, 0.4 mmol, 2.0 equiv.) and **2a** (38.1 mg, 0.2 mmol, 1.0 equiv.), Cu(OTf)<sub>2</sub> (7.3 mg, 10 mol%), 3,4,7,8-tetramethyl-1,10-phenanthroline (7.1 mg, 15 mol%) and 4 mL DCM by **GP-1**, TLC (*R<sub>f</sub>* = 0.3, PE/EA = 10:1). After purification by column chromatography (PE/EA = 50:1 to 20:1), **3r** (dr = 4.0:1, 63.4 mg, 84%) was obtained as yellow oil: Two diastereoisomers are hard to be separated by column chromatography on silica gel. **<sup>1</sup>H NMR (600 MHz, CDCl<sub>3</sub>)** δ [8.06 (d, *J* = 6.5 Hz, 1.8H), 7.76 – 7.74 (m, 0.1H), 7.51 – 7.49 (m, 0.1H), [7.58 – 7.52 (m, 3.6H), 7.38 – 7.29 (m, 0.4H)], 7.23 (t, *J* = 7.6 Hz, 1H), 7.05 (t, *J* = 7.5 Hz, 1H), [6.95 (d, *J* = 8.5 Hz, 1.8H), 6.79 (d, *J* = 8.5 Hz, 0.2H)], [7.19 – 7.17 (m, 0.1H), 6.86 (d, *J* = 7.4 Hz, 0.9H)], [6.67 (d, *J* = 8.4 Hz, 1.8H), 6.41 (d, *J* = 8.4 Hz, 0.2H)], [6.60 (s, 0.1H), 6.56 (s, 0.9H)], [4.49 (s, 0.9H), 4.39 (s, 0.1H)], [1.75 (s, 2.7H), 1.68 (s, 0.3H)]; **<sup>13</sup>C NMR (125 MHz, CDCl<sub>3</sub>)** δ 204.4, 176.5, 176.3, 154.8, 137.5, 132.9, 132.3, 132.2, 131.8, 131.4, 123.0, 129.5, 129.2, 128.1, 127.4, 125.9, 123.0, 121.1, 73.6, 60.0, [29.7, 15.9]; **HRMS (ESI)** calculated for [C<sub>25</sub>H<sub>18</sub>ClNNaO]<sup>+</sup>: 406.0969, found: 406.0966.

**19. (1S,5R)-5-(4-chlorophenyl)-2-ethyl-2,2,2-trimethyl-2'-phenyl-2λ<sup>7</sup>-spiro[cyclopentane-1,3'-indol]-2-en-4-one (**3s**)**

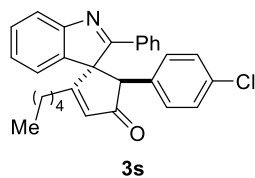

The general procedure was followed using **1s** (116.3 mg, 0.4 mmol, 2.0 equiv.) and **2a** (39.0 mg, 0.2 mmol, 1.0 equiv.), Cu(OTf)<sub>2</sub> (7.2 mg, 10 mol%), 3,4,7,8-tetramethyl-1,10-phenanthroline (7.1 mg, 15 mol%) and 4 mL DCM by **GP-1**, TLC (*R<sub>f</sub>* = 0.4, PE/EA = 10:1). After purification by column chromatography (PE/EA = 50:1 to 20:1), **3s** (dr = 7.2:1, 59.0 mg, 62%) was obtained as yellow oil: Two diastereoisomers are hard to be separated by column chromatography on silica gel. **<sup>1</sup>H NMR (600 MHz, CDCl<sub>3</sub>)** δ [8.07 – 8.04(m, 1.8H), 7.75 (d, *J* = 7.7 Hz, 0.1H), 7.50 (d, *J* = 7.6 Hz, 0.1H)] [7.56 – 7.50 (m, 3.6H), 7.40 – 7.36 (m, 0.4H)], [7.34 – 7.30 (m, 0.1H), 7.25 – 7.21 (m, 0.9H),] 7.04 (t, *J* = 6.9 Hz, 1H), [6.95 (d, *J* = 8.1 Hz, 1.8H), 6.79 (d, *J* = 8.2 Hz, 0.2H)], [7.18 (d, *J* = 7.6 Hz, 0.1H), 6.85 (d, *J* = 7.5 Hz, 0.9H)], [6.66 (d, *J* = 8.1 Hz, 1.8H), 6.40 (d, *J* = 8.2 Hz, 0.2H)], [6.62 (s, 0.1H), 6.59 (s, 0.9H)], [4.49 (s, 0.9H), 4.39 (s, 0.1H)], 2.10 – 2.03 (m, 1H), 1.70 – 1.64 (m, 1H), 1.51 – 1.42 (m, 2H), 1.14 – 1.12 (s, 4H), 0.76 (s, 3H); **<sup>13</sup>C NMR (150 MHz, CDCl<sub>3</sub>)** δ 204.4, 181.1, 176.4, 154.6, 137.9, 132.9, 132.2, 132.1, 131.8, 130.0, 129.4, 129.1, 128.0, 127.4, 125.8,

123.0, 121.1, 73.6, 59.8, 30.9, 29.7, 26.2, 22.1, 13.7; **HRMS** (ESI) calculated for  $[C_{29}H_{26}ClNNaO]$   $[M+Na]^+$ : 462.1595, found: 462.1593.

20. **(1*S*,5*R*)-5-(4-bromophenyl)-2-ethyl-2,2,2,2,2,2-octamethyl-2'-phenyl-2*λ*<sup>12</sup>-**

**spiro[cyclopentane-1,3'-indol]-2-en-4-one (3t)**

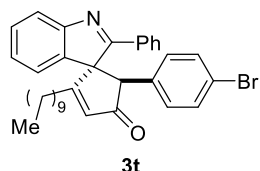

The general procedure was followed using **1t** (138.5 mg, 0.4 mmol, 2.0 equiv.) and **2a** (40.5 mg, 0.2 mmol, 1.0 equiv.),  $Cu(OTf)_2$  (7.3 mg, 10 mol%), 3,4,7,8-tetramethyl-1,10-phenanthroline (7.1 mg, 15 mol%) and 4 mL DCM by **GP-1**, TLC ( $R_f$  = 0.4, PE/EA = 10:1). After purification by

column chromatography (PE/EA = 50:1 to 20:1), **3t** (dr = 12:1, 92.8 mg, 82%) was obtained as yellow oil: Two diastereoisomers are hard to be separated by column chromatography on silica gel.

**<sup>1</sup>H NMR (500 MHz,  $CDCl_3$ )**  $\delta$  [8.05 (d,  $J$  = 6.2 Hz, 1.8H), 7.76 – 7.73 (m, 0.1H), 7.51 – 7.48 (m, 0.1H)], [7.57 – 7.51 (m, 3.6H), 7.40 – 7.35 (m, 0.4H)], [7.23 (t,  $J$  = 7.1 Hz, 0.9H), 7.40 – 7.30 (m, 0.1H)], [7.10 (d,  $J$  = 8.4 Hz, 1.8H), 6.94 (d  $J$  = 8.4 Hz, 0.2H)], 7.04 (t,  $J$  = 7.4 Hz, 1H), [7.18 (d,  $J$  = 7.5 Hz, 0.1H), 6.85 (d,  $J$  = 7.5 Hz, 0.9H)], [6.61 (d,  $J$  = 8.4 Hz, 1.8H), 6.34 (d,  $J$  = 8.4 Hz, 0.2H)], 6.58 (s, 1H), [4.47 (s, 0.9H), 4.37 (s, 0.1H)], 2.10 – 2.03 (m, 1H), 1.70 – 1.64 (m, 1H), 1.50 – 1.40 (m, 2H), 1.27 – 1.23 (m, 2H), 1.21 – 1.18 (m, 4H), 1.16 – 1.09 (m, 8H), 0.86 (t,  $J$  = 7.1 Hz, 3H); **<sup>13</sup>C NMR (125 MHz,  $CDCl_3$ )**  $\delta$  204.2, 181.1, 176.4, 154.7, 137.9, 132.7, 132.3, 131.7, 131.0, 130.4, 129.4, 129.2, 127.4, 125.8, 123.0, 121.2, 121.1, 73.5, 59.9, 31.8, 29.8, 29.4, 29.3, 29.2, 29.0, 28.8, 26.6, 22.6, 14.0; **HRMS** (ESI) calculated for  $[C_{34}H_{36}BrNNaO]$   $[M+Na]^+$ : 576.1872, found: 576.1866.

21. **(1*R*,5*R*)-5-(4-bromophenyl)-2-cyclopropyl-2'-phenylspiro[cyclopentane-1,3'-indol]-2-en-**

**4-one (3u)**

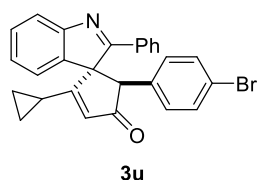

The general procedure was followed using **1u** (117.7 mg, 0.4 mmol, 2.0 equiv.) and **2a** (39.7 mg, 0.2 mmol, 1.0 equiv.),  $Cu(OTf)_2$  (7.3 mg, 10 mol%), 3,4,7,8-tetramethyl-1,10-phenanthroline (7.1 mg, 15 mol%) and 4 mL DCM by **GP-1**, TLC ( $R_f$  = 0.3, PE/EA = 10:1). After purification by

column chromatography (PE/EA = 50:1 to 20:1), **3u** (dr = 1.7:1, 73.6 mg, 79%) was obtained as yellow soild: Two diastereoisomers are hard to be separated by column chromatography on silica gel. **<sup>1</sup>H NMR (600 MHz,  $CDCl_3$ )**  $\delta$  [8.10 (d,  $J$  = 7.6 Hz, 1.70H), 7.76 – 7.74 (m, 0.15H), 7.51 –

7.49 (m, 0.15H), [7.59 – 7.52 (m, 3.55H), 7.40 – 7.36 (m, 0.45H)], [7.34 – 1.31 (m, 0.15H), 7.24 (t,  $J = 7.6$  Hz, 0.85H)], [7.2 – 7.16 (m, 0.15H), 6.88 (d,  $J = 7.5$  Hz, 0.85H)], [7.10 (d,  $J = 8.1$  Hz, 1.70H), 6.94 (d,  $J = 8.1$  Hz, 0.30H)], 7.06 (t,  $J = 7.5$  Hz, 1H), [6.60 (d,  $J = 8.1$  Hz, 1.70H), 6.34 (d,  $J = 8.1$  Hz, 0.30H)], 6.17 (d,  $J = 6.7$  Hz, 1H), [4.45 (s, 0.85H), 4.36 (s, 0.15H)], 1.04 – 1.00 (m, 1H), 0.91 – 0.81 (m, 4H);  $^{13}\text{C}$  NMR (125 MHz,  $\text{CDCl}_3$ )  $\delta$  [204.4, 203.7], [185.5, 184.2], [177.1, 176.7], [154.8, 141.9], [137.9, 134.8], [133.0, 132.8], 132.4, 131.7, [131.0, 130.7], [130.5, 130.4], [129.8, 129.4], [129.3, 129.2], 128.1, [127.7, 127.1], [125.9, 124.5], [123.4, 121.6], [122.9, 121.4], [121.1, 121.0], [74.0, 73.6], [59.6, 59.5], [14.2, 13.9], [13.6, 13.5], [11.7, 11.6]; m.p. = 136.7 – 147.8 °C; HRMS (ESI) calculated for  $[\text{C}_{27}\text{H}_{20}\text{BrNNaO}] [\text{M}+\text{Na}]^+$ : 476.0620, found: 476.0617.

## 22. (1*S*,5*R*)-2',5-diphenylspiro[cyclopentane-1,3'-indol]-2-en-4-one (3v)

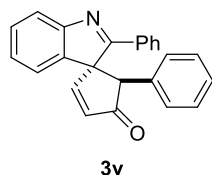

The general procedure was followed using **1v** (68.2 mg, 0.4 mmol, 2.0 equiv.) and **2a** (38.2 mg, 0.2 mmol, 1.0 equiv.),  $\text{Cu}(\text{OTf})_2$  (7.3 mg, 10 mol%), 3,4,7,8-tetramethyl-1,10-phenanthroline (7.1 mg, 15 mol%) and 4 mL DCM by **GP-1**,

TLC ( $R_f$  = 0.4, PE/EA = 10:1). After purification by column chromatography

(PE/EA = 50:1 to 20:1), **3v** (dr = 2.3:1, 23.1 mg, 35%) was obtained as pale yellow oil: Two diastereoisomers are hard to be separated by column chromatography on silica gel.  $^1\text{H}$  NMR (500 MHz,  $\text{CDCl}_3$ )  $\delta$  [8.12 – 8.09 (m, 1.50H), 7.75 – 7.73 (m, 0.25H), 7.58 – 7.56 (m, 0.25H)], [7.64 (d,  $J = 5.6$  Hz, 0.75H), 7.29 – 7.27 (m, 0.25H)], [7.55 – 7.49 (m, 3.00H), 7.39 – 7.33 (m, 1.00H)], [7.21 – 7.12 (m, 1.25H), 7.05 – 6.91 (m, 3.75H)], 6.87 – 6.84 (m, 1.00H), [6.83 – 6.82 (m, 0.25H), 6.81 (d,  $J = 5.4$  Hz, 0.75H)], [6.73 (d,  $J = 5.9$  Hz, 1.50H), 6.49 – 6.47 (m, 0.50H)], [4.47 (s, 0.75H), 4.39 (s, 0.25H)];  $^{13}\text{C}$  NMR (125 MHz,  $\text{CDCl}_3$ )  $\delta$  205.6, 176.8, [162.4, 161.8], 154.6, [136.9, 135.8], 134.2, 133.6, 132.8, [131.6, 130.3], [129.5, 129.3], 129.0, [128.7, 128.1], [128.0, 127.9], [127.8, 127.6], [127.2, 127.1], [126.9, 125.6], [124.2, 121.6], [121.5, 121.0], [71.4, 71.0], 59.3; HRMS (ESI) calculated for  $[\text{C}_{24}\text{H}_{17}\text{NNaO}] [\text{M}+\text{Na}]^+$ : 358.1202, found: 358.1205.



## 6. Gram scale preparation of 3a and synthetic application

### 6.1 Gram scale preparation of spirocyclic 3a

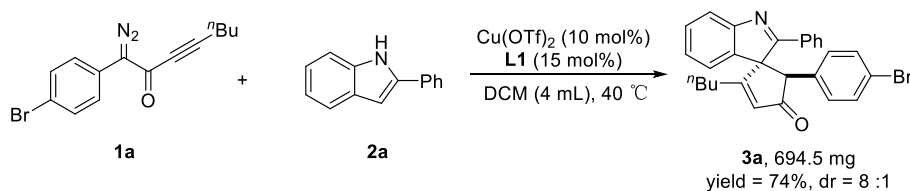

In a dried glass tube, a mixture of  $\text{Cu(OTf)}_2$  (72.8 mg, 10 mol%), 3,4,7,8-tetramethyl-1,10-phenanthroline (70.2 mg, 15 mol%) in DCM (20 mL) was stirred at room temperature for 15 mins. Subsequently, indole **2a** (2.0 mmol, 1.0 equiv.) was added to the reaction mixture at room temperature, and diazo compounds **1a** (4.0 mmol, 2.0 equiv.) was dissolved in 20 mL DCM and added to the reaction mixture. Then the resulting mixture was continually stirred at 40 °C for 2 h and **2a** was consumed completely determined by TLC analysis. The dr of the product was calculated by crude  $^1\text{H}$  NMR. The mixture was concentrated under reduced pressure and the residue was purified by column chromatography on silica gel (PE/EA = 60:1 to 30:1) to afford the desired product **3a**.

### 6.2 Synthetic application

#### 1) 5-(4-bromophenyl)-2-butyl-2'-phenylspiro[cyclopentane-1,3'-indol]-2-en-4-ol (**5**)

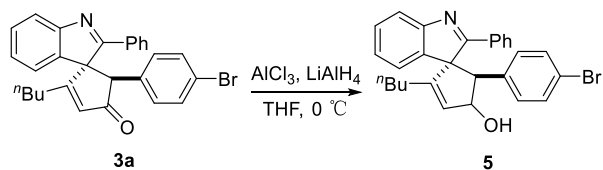

In a dried reaction tube, **3a** (70.4 mg, 0.15 mmol, 1.0 equiv.) and  $\text{AlCl}_3$  (30 mg, 0.22 mmol, 1.5 equiv.) were dissolved with THF (2.0 mL), then  $\text{LiAlH}_4$  (0.3 mL, 0.3 mmol, 2.0 equiv.) was slowly dropped at 0 °C and stirred for 15 mins. After the reaction was complete (monitored by TLC), the crude reaction mixture was filtered with Celite and washed with EA. The solvent was removed under reduced pressure. Then the residue was purified by silica gel column chromatography (PE/EA = 30:1 to 10:1) to afford the desired product **5** (dr = 5.7:1, 27.1 mg, 38%; 29.5 mg, 42%) as a yellow oil.  $^1\text{H}$  NMR

(**500 MHz, CDCl<sub>3</sub>**)  $\delta$  [8.00 – 7.93 (m, 1.70H), 7.44 – 7.40 (m, 0.30H)], [7.73 – 7.70 (m, 0.85H), 7.66 – 7.64 (m, 0.15H)], 7.53 (d,  $J$  = 7.7 Hz, 1H), [7.51 – 7.45 (m, 2.55H), 7.39 – 7.35 (m, 0.45H)], 7.34 – 7.30 (m, 1H), [7.25 – 7.21 (m, 0.85H), 6.97 – 6.93 (m, 0.15)], [7.10 (d,  $J$  = 8.6 Hz, 0.3H), 7.05 (d,  $J$  = 8.6 Hz, 1.7H)], 6.64 (t,  $J$  = 9.5 Hz, 2H), [6.30 (d,  $J$  = 2.3 Hz, 0.15H), 6.23 (d,  $J$  = 2.3 Hz, 0.85H), 5.15 (s, 1H), 3.98 (d,  $J$  = 5.5 Hz, 1H), [2.20 (d,  $J$  = 3.7 Hz, 0.85H), 2.03 – 2.04 (m, 0.15H)], [1.88 – 1.80 (m, 0.85H), 1.74 – 1.68 (m, 0.15H)], 1.49 – 1.42 (m, 1H), 1.42 – 1.29 (m, 2H), 1.20 – 1.12 (m, 2H), [0.82 (t,  $J$  = 7.3 Hz, 0.45H), 0.74 (t,  $J$  = 7.3 Hz, 2.55H)]; **<sup>13</sup>C NMR (125 MHz, CDCl<sub>3</sub>)**  $\delta$  179.1, 154.8, 153.6, 139.2, 134.6, 133.5, 131.4, 130.9, [130.7, 130.7], 130.5, 128.9, [128.6, 128.5], [128.2, 128.2], 127.8, [125.6, 121.63], [125.5, 121.3], 121.1, 120.7, 76.5, 76.0, [57.5, 56.9], [29.2, 29.1], [27.7, 27.3], [22.4, 22.2], [13.8, 13.8]; **HRMS (ESI)** calculated for [C<sub>28</sub>H<sub>27</sub>BrNO] [M+H]<sup>+</sup>: 472.1271, found: 472.1280. **<sup>1</sup>H NMR (500 MHz, CDCl<sub>3</sub>)**  $\delta$  8.23 – 8.20 (m, 2H), 7.55 – 7.51 (m, 3H), 7.44 (d,  $J$  = 7.7 Hz, 1H), 7.23 – 7.19 (m, 1H), 7.13 – 7.04 (m, 4H), 6.62 (d,  $J$  = 8.6 Hz, 2H), 6.11 (d,  $J$  = 1.7 Hz, 1H), 5.71 (s, 1H), 4.04 (d,  $J$  = 8.1 Hz, 1H), 2.28 (d,  $J$  = 5.8 Hz, 1H), 1.90 – 1.83 (m, 1H), 1.42 – 1.36 (m, 1H), 1.35 – 1.26 (m, 2H), 1.18 – 1.11 (m, 2H), 0.72 (t,  $J$  = 7.3 Hz, 3H); **<sup>13</sup>C NMR (125 MHz, CDCl<sub>3</sub>)**  $\delta$  177.7, 154.2, 148.9, 139.6, 134.4, 133.0, 131.1, 130.8, 129.4, 129.2, 129.1, 128.5, 128.2, 125.4, 122.9, 120.9, 120.8, 78.4, 75.9, 62.7, 29.0, 28.0, 22.2, 13.7; **HRMS (ESI)** calculated for [C<sub>28</sub>H<sub>27</sub>BrNO] [M+H]<sup>+</sup>: 472.1271, found: 472.1277.

2) **5-(4-bromophenyl)-2-butyl-2'-phenylspiro[cyclopentane-1,3'-indolin]-2-en-4-one (6)**

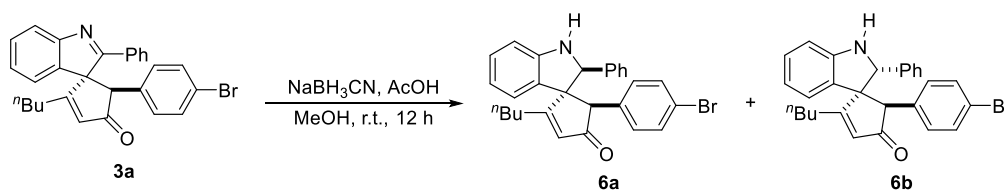

To a dried reaction tube containing compound **3a** (90.0 mg, 0.20 mmol, 1.0 equiv.) in MeOH (2 mL) at RT was added NaBH<sub>3</sub>CN (50.3 mg, 0.40 mmol, 2.0 equiv.), and AcOH (28.8 mg, 0.24 mmol, 1.2 equiv.). After 48 h, the reaction was quenched with saturated aqueous NaHCO<sub>3</sub> (10 mL), extracted successively with EA (3×10 mL), and the combined organics washed with brine (10 mL), dried by Na<sub>2</sub>SO<sub>4</sub>. The solvent was removed under reduced pressure. Then the residue was purified by silica gel column chromatography (PE/EA = 50:1 to 20:1) to afford the desired yellow solid product **6a**.

(51.5 mg, 57%) and yellow oil product **6b** (11.7 mg, 13%): Two diastereoisomers can be separated by column chromatography on silica gel. **<sup>1</sup>H NMR (500 MHz, CDCl<sub>3</sub>)** δ 7.41 (d, *J* = 5.0 Hz, 4H), 7.36 – 7.32 (m, 1H), 7.07 (d, *J* = 8.2 Hz, 2H), 6.95 – 6.90 (m, 1H), 6.58 (d, *J* = 8.1 Hz, 3H), 6.49 (t, *J* = 7.4 Hz, 1H), 6.41 (d, *J* = 9.5 Hz, 2H), 5.32 (s, 1H), 4.14 (s, 1H), 3.56 (s, 1H), 2.70 – 2.58 (m, 1H), 2.52 – 2.45 (m, 1H), 1.82 – 1.73 (m, 2H), 1.47 (q, *J* = 7.4 Hz, 2H), 0.98 (t, *J* = 7.3 Hz, 3H); **<sup>13</sup>C NMR (125 MHz, CDCl<sub>3</sub>)** δ 206.9, 180.9, 150.1, 137.4, 136.3, 132.3, 131.5, 130.4, 129.1, 128.9, 128.6, 128.3, 126.8, 125.2, 120.3, 119.0, 109.8, 70.3, 67.8, 57.5, 30.4, 29.5, 22.6, 13.9; m.p. = 125.7 - 126.3 °C; **HRMS (ESI)** calculated for [C<sub>28</sub>H<sub>26</sub>BrNNaO] [M+Na]<sup>+</sup>: 494.1090, found: 494.1086. **<sup>1</sup>H NMR (500 MHz, CDCl<sub>3</sub>)** δ 7.35 – 7.28 (m, 5H), 7.27 – 7.25 (m, 2H), 7.00 (t, *J* = 7.7 Hz, 1H), 6.84 (d, *J* = 8.5 Hz, 2H), 6.72 (d, *J* = 7.8 Hz, 1H), 6.42 (t, *J* = 7.5 Hz, 1H), 6.11 (s, 1H), 6.09 (d, *J* = 7.5 Hz, 1H), 5.07 (s, 1H), 4.26 (s, 1H), 4.14 (s, 1H), 1.75 – 1.68 (m, 1H), 1.40 – 1.33 (m, 1H), 1.28 – 1.20 (m, 2H), 1.02 – 0.95 (m, 2H), 0.66 (t, *J* = 6.9 Hz, 3H); **<sup>13</sup>C NMR (125 MHz, CDCl<sub>3</sub>)** δ 207.0, 184.2, 151.1, 139.4, 136.6, 131.2, 131.1, 130.6, 128.7, 128.6, 128.3, 126.8, 126.6, 126.1, 121.0, 118.9, 109.3, 74.7, 68.6, 65.1, 30.5, 29.3, 22.2, 13.6; **MALDI-MS** calculated for [C<sub>28</sub>H<sub>27</sub>BrNO] [M+H]<sup>+</sup>: 472.1276, found: 472.0580.

## 7. The studies of biological activity

### Antibacterial activity of compounds **3**, **5** and **6a** against *Xanthomonas oryzae* pv. *oryzae* (*Xoo*) and *Xanthomonas axonopodis* pv. *citri* (*Xac*):

Antibacterial activities of the title compounds against *Xoo* and *Xac* were evaluated by using the turbidimeter test. Thiodiazole-copper was used as the positive controls. The compound was dissolved in 150.0  $\mu\text{L}$  of dimethylformamide and diluted with 0.1% ( $V/V$ ) Tween-20 to prepare the solutions on a concentration of 100  $\mu\text{g/mL}$ . 1.0 mL of the above solution was added to the non-toxic nutrient broth (NB: 1.5 g of beef extract, 2.5 g of peptone, 0.5 g of yeast powder, 5.0 g of glucose and 500 mL of distilled water, pH = 7.0 ~ 7.2) liquid medium in a 4.0 mL tube. Then, 40.0  $\mu\text{L}$  of NB solution containing *Xanthomonas oryzae* pv. *oryzae* (*Xoo*) or *Xanthomonas axonopodis* pv. *citri* (*Xac*) was added to 5.0 mL of the NB solution containing the test compound. The inoculated test tube was incubated at  $(28 \pm 1)^\circ\text{C}$  under continuous shaking at 200 rpm for 24 h. The culture growth was monitored by measuring the optical density at 595 nm ( $\text{OD}_{595}$ ) and expressed as corrected turbidity. The relative inhibitory rate was calculated as follows:

$$I(\%) = (C_{\text{tur}} - T_{\text{tur}}) / C_{\text{tur}} \times 100\%$$

$C_{\text{tur}}$ : the corrected turbidity value of bacterial growth on untreated NB;

$T_{\text{tur}}$ : the corrected turbidity value of bacterial growth on treated NB;

$I$ : The relative inhibitory rate.<sup>[4]</sup>

Supplementary Table 3. Inhibition rate of compound **3**, **5** and **6a** against *Xoo* and *Xac* at (100  $\mu\text{g/mL}$ ). <sup>[a]</sup>

| compounds | <i>Xoo</i> inhibition rate [%] | <i>Xac</i> inhibition rate [%] |
|-----------|--------------------------------|--------------------------------|
| <b>3a</b> | 50.05 $\pm$ 2.68               | 7.37 $\pm$ 3.81                |
| <b>3b</b> | 29.58 $\pm$ 1.95               | 43.49 $\pm$ 5.03               |
| <b>3c</b> | 24.34 $\pm$ 1.54               | 45.04 $\pm$ 3.35               |
| <b>3d</b> | 54.41 $\pm$ 5.65               | 5.42 $\pm$ 2.28                |
| <b>3e</b> | 13.28 $\pm$ 1.94               | 68.54 $\pm$ 1.26               |
| <b>3f</b> | 56.50 $\pm$ 2.28               | 23.49 $\pm$ 3.89               |
| <b>3g</b> | 21.42 $\pm$ 4.48               | 46.13 $\pm$ 3.06               |

---

|                         |            |            |
|-------------------------|------------|------------|
| <b>3h</b>               | 64.68±2.88 | 42.40±2.0  |
| <b>3i</b>               | 3.82±3.35  | 48.15±3.32 |
| <b>3k</b>               | 0          | 41.21±0.59 |
| <b>3l</b>               | 71.68±1.27 | 67.38±2.52 |
| <b>3m</b>               | 23.27±2.58 | 19.74±1.87 |
| <b>3n</b>               | 50.82±1.23 | 25.67±2.99 |
| <b>3o</b>               | 65.08±1.65 | 0          |
| <b>3p</b>               | 41.31±0.58 | 65.29±1.26 |
| <b>3q</b>               | 71.77±0.22 | 78.45±0.44 |
| <b>3r</b>               | 56.64±0.77 | 54.87±1.27 |
| <b>3s</b>               | 33.22±0.57 | 52.70±2.27 |
| <b>3t</b>               | 62.07±0.38 | 76.06±1.27 |
| <b>3u</b>               | 44.22±2.71 | 58.93±2.05 |
| <b>3v</b>               | 63.63±2.52 | 0          |
| <b>5</b>                | 76.72±0.70 | 78.73±2.46 |
| <b>6a</b>               | 29.43±0.46 | 33.84±1.02 |
| <b>BT<sup>[b]</sup></b> | 53.29±1.30 | 53.72±2.11 |
| <b>TC<sup>[b]</sup></b> | 49.88±1.36 | 49.60±1.97 |

---

<sup>[a]</sup> All data were average data of three replicates; <sup>[b]</sup> Commercial bactericide was used as the positive control, **BT** = Bismethiazol, **TC** = Thiodiazole-copper.

---

## 8. References

1. a) H. Wang, J. R. Denton, H. M. L. Davies, *Org. Lett.* **2011**, *13*, 4316–4319; b) X. Liu, M. Li, K. Dong, S. Peng, L. Liu, *Org. Lett.* **2022**, *24*, 2175–2180; c) X. Liu, Z. Tang, Z. Li, L. Xu, L. Liu, *Nat. Commun.* **2021**, *12*, 7298. c) X. Ji, C. Shen, Y. Ni, Z.-Y. Si, Y. Wang, X. Zhi, Y. Zhao, H. Peng and L. Liu, *Angew. Chem. Int. Ed.* **2024**, e202400805 (3 of 8).
2. J. Zhao, Y. Zhang, and K. Cheng, *J. Org. Chem.* **2008**, *73*, 7428–7431.
3. a) Á. González-Gómez, G. Domínguez, and J. Pérez-Castells, *Eur. J. Org. Chem.* **2009**, 5057–5062; b) S. S. K. Boominathan, G. C. Senadi, J. K. Vandavasi, J. Y.-F. Chen, and J.-J. Wang, *Chem. Eur. J.* **2015**, *21*, 3193–3197; c) Z. Chen, X.-X. Shi, D.-Q. Ge, Z.-Z. Jiang, Q.-Q. Jin, H.-J. Jiang, J.-S. Wu, *Chinese Chemical Letters* **2017**, *28*, 231–234; d) Y. Jiang and S. Youn, *Org. Lett.* **2014**, *16*, 3720–3723.
4. Y. Chen, T. Li, Z. Jin, Y. R. Chi, *J. Agric. Food Chem.* **2022**, *70*, 6050–6058.

## 9. X-ray Crystal data for 6a

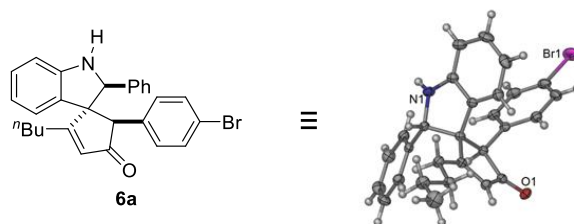

Crystal data and structure refinement for exp\_4174\_auto.

|                                             |                                                               |
|---------------------------------------------|---------------------------------------------------------------|
| Identification code                         | exp_4174_auto                                                 |
| Empirical formula                           | C <sub>28</sub> H <sub>26</sub> BrNO                          |
| Formula weight                              | 472.41                                                        |
| Temperature/K                               | 169.99(10)                                                    |
| Crystal system                              | orthorhombic                                                  |
| Space group                                 | P2 <sub>1</sub> 2 <sub>1</sub> 2 <sub>1</sub>                 |
| a/Å                                         | 15.45840(10)                                                  |
| b/Å                                         | 15.99770(10)                                                  |
| c/Å                                         | 18.87770(10)                                                  |
| α/°                                         | 90                                                            |
| β/°                                         | 90                                                            |
| γ/°                                         | 90                                                            |
| Volume/Å <sup>3</sup>                       | 4668.43(5)                                                    |
| Z                                           | 8                                                             |
| ρ <sub>calc</sub> /cm <sup>3</sup>          | 1.344                                                         |
| μ/mm <sup>-1</sup>                          | 2.538                                                         |
| F(000)                                      | 1952.0                                                        |
| Crystal size/mm <sup>3</sup>                | 0.26 × 0.22 × 0.18                                            |
| Radiation                                   | Cu Kα (λ = 1.54184)                                           |
| 2θ range for data collection/°              | 7.244 to 134.15                                               |
| Index ranges                                | -18 ≤ h ≤ 18, -19 ≤ k ≤ 19, -22 ≤ l ≤ 22                      |
| Reflections collected                       | 133994                                                        |
| Independent reflections                     | 8340 [R <sub>int</sub> = 0.0567, R <sub>sigma</sub> = 0.0191] |
| Data/restraints/parameters                  | 8340/0/561                                                    |
| Goodness-of-fit on F <sup>2</sup>           | 1.042                                                         |
| Final R indexes [I ≥ 2σ (I)]                | R <sub>1</sub> = 0.0230, wR <sub>2</sub> = 0.0596             |
| Final R indexes [all data]                  | R <sub>1</sub> = 0.0236, wR <sub>2</sub> = 0.0600             |
| Largest diff. peak/hole / e Å <sup>-3</sup> | 0.33/-0.48                                                    |
| Flack parameter                             | -0.020(4)                                                     |

## 10. NMR and HRMS spectra of new compounds

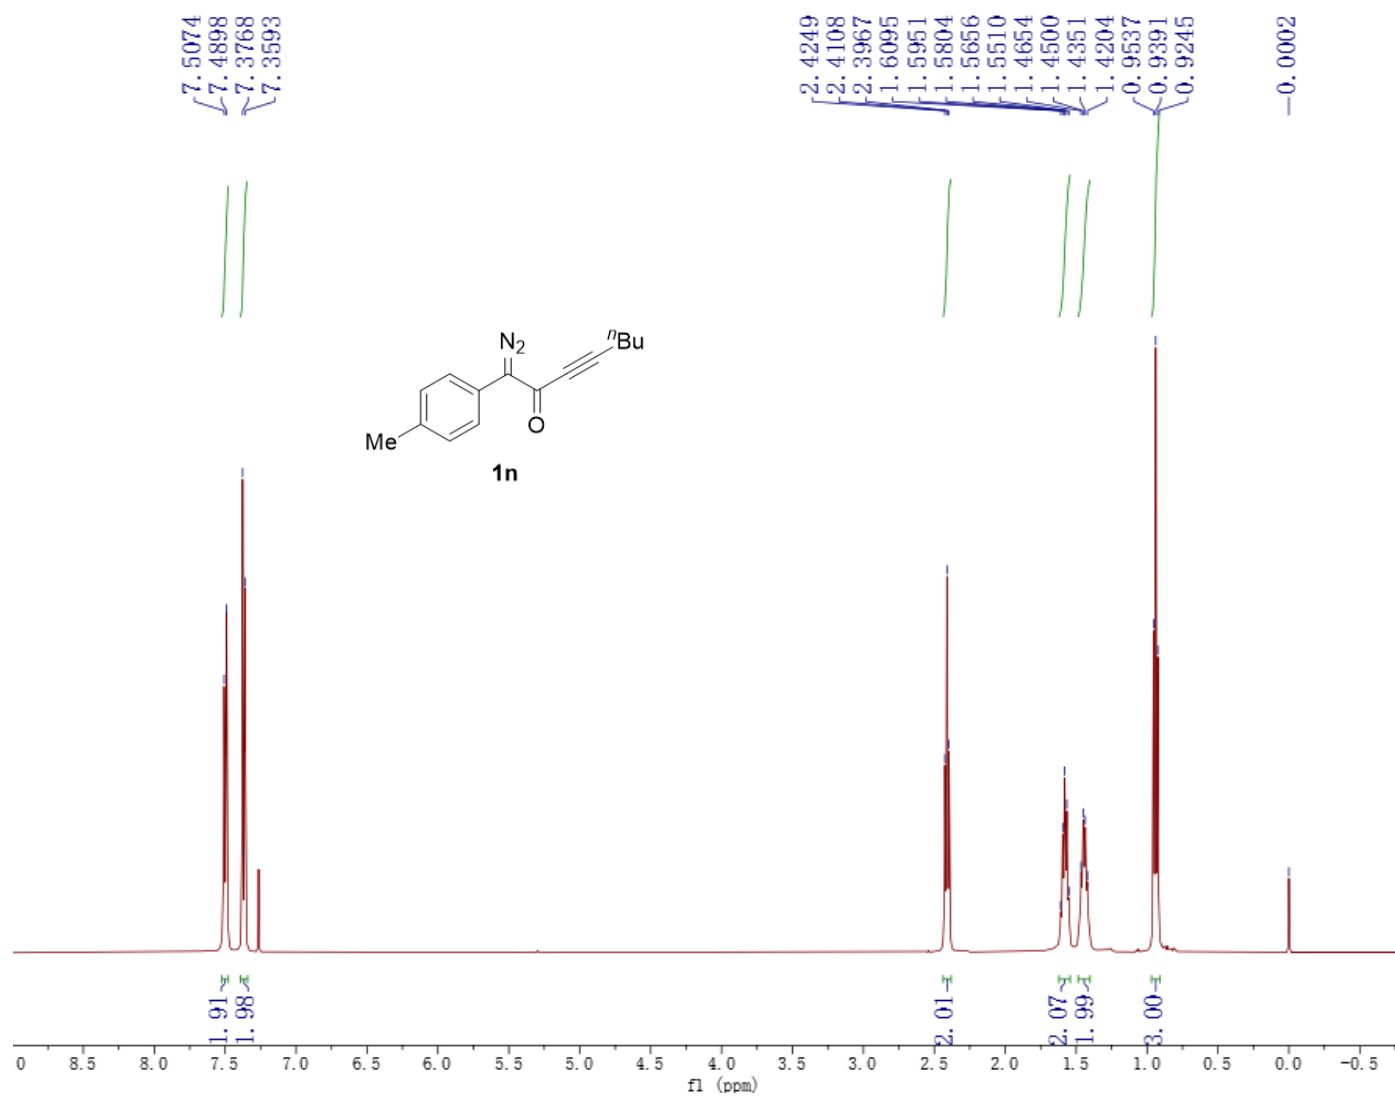



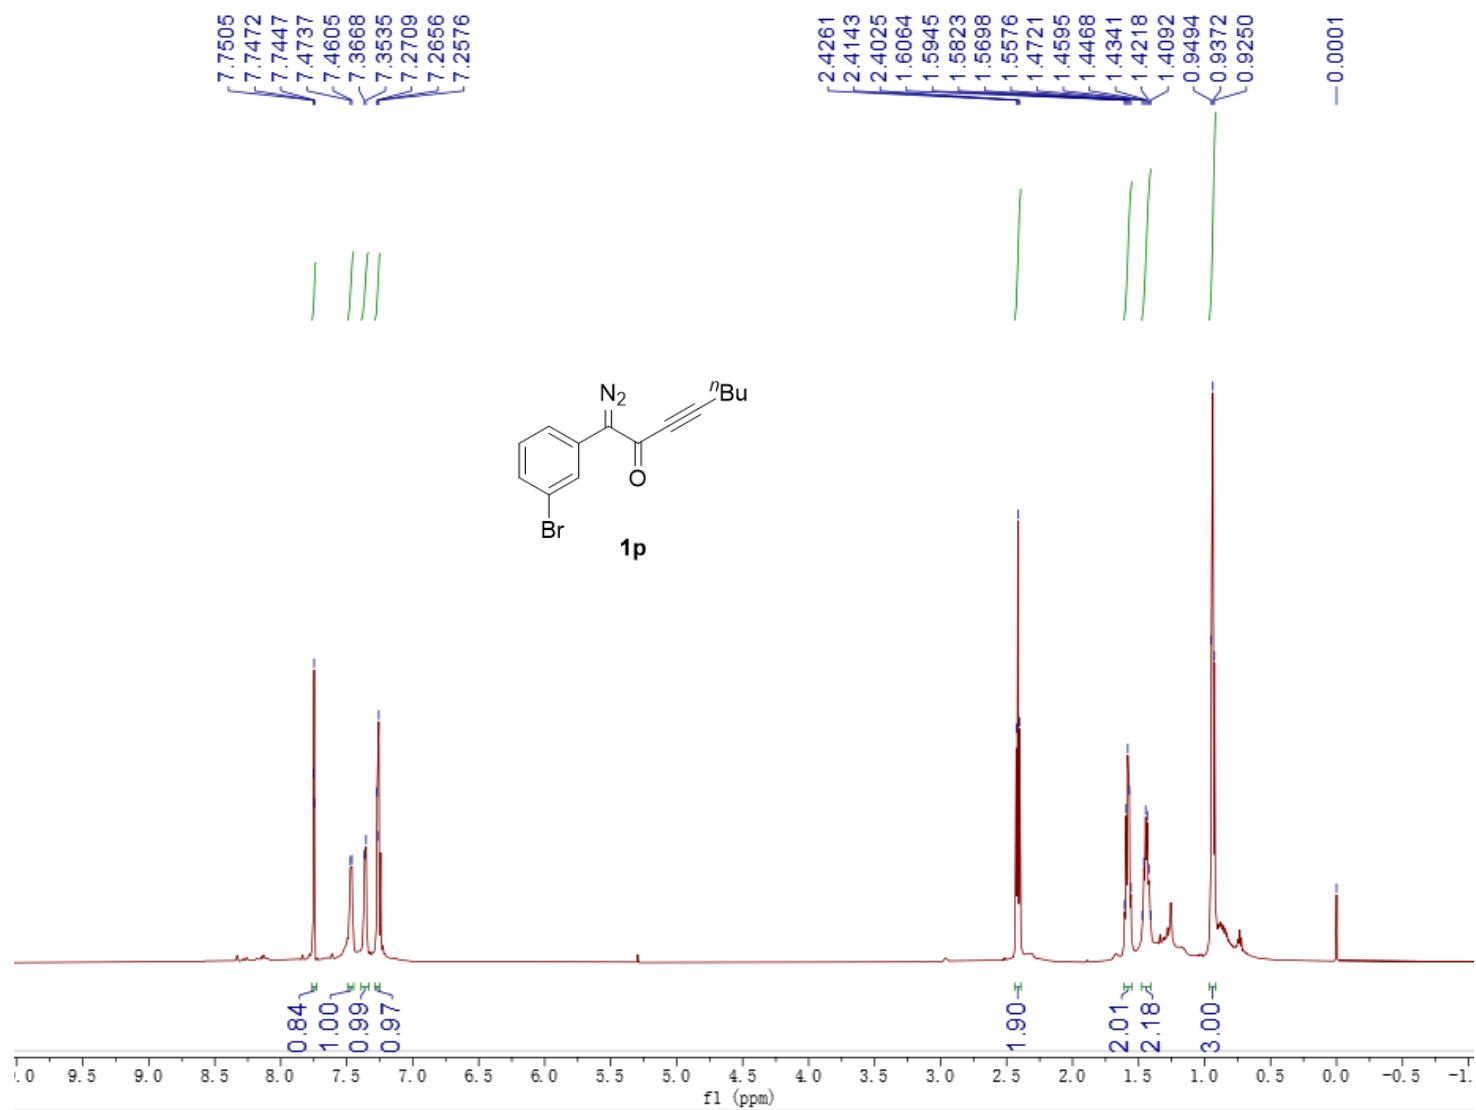

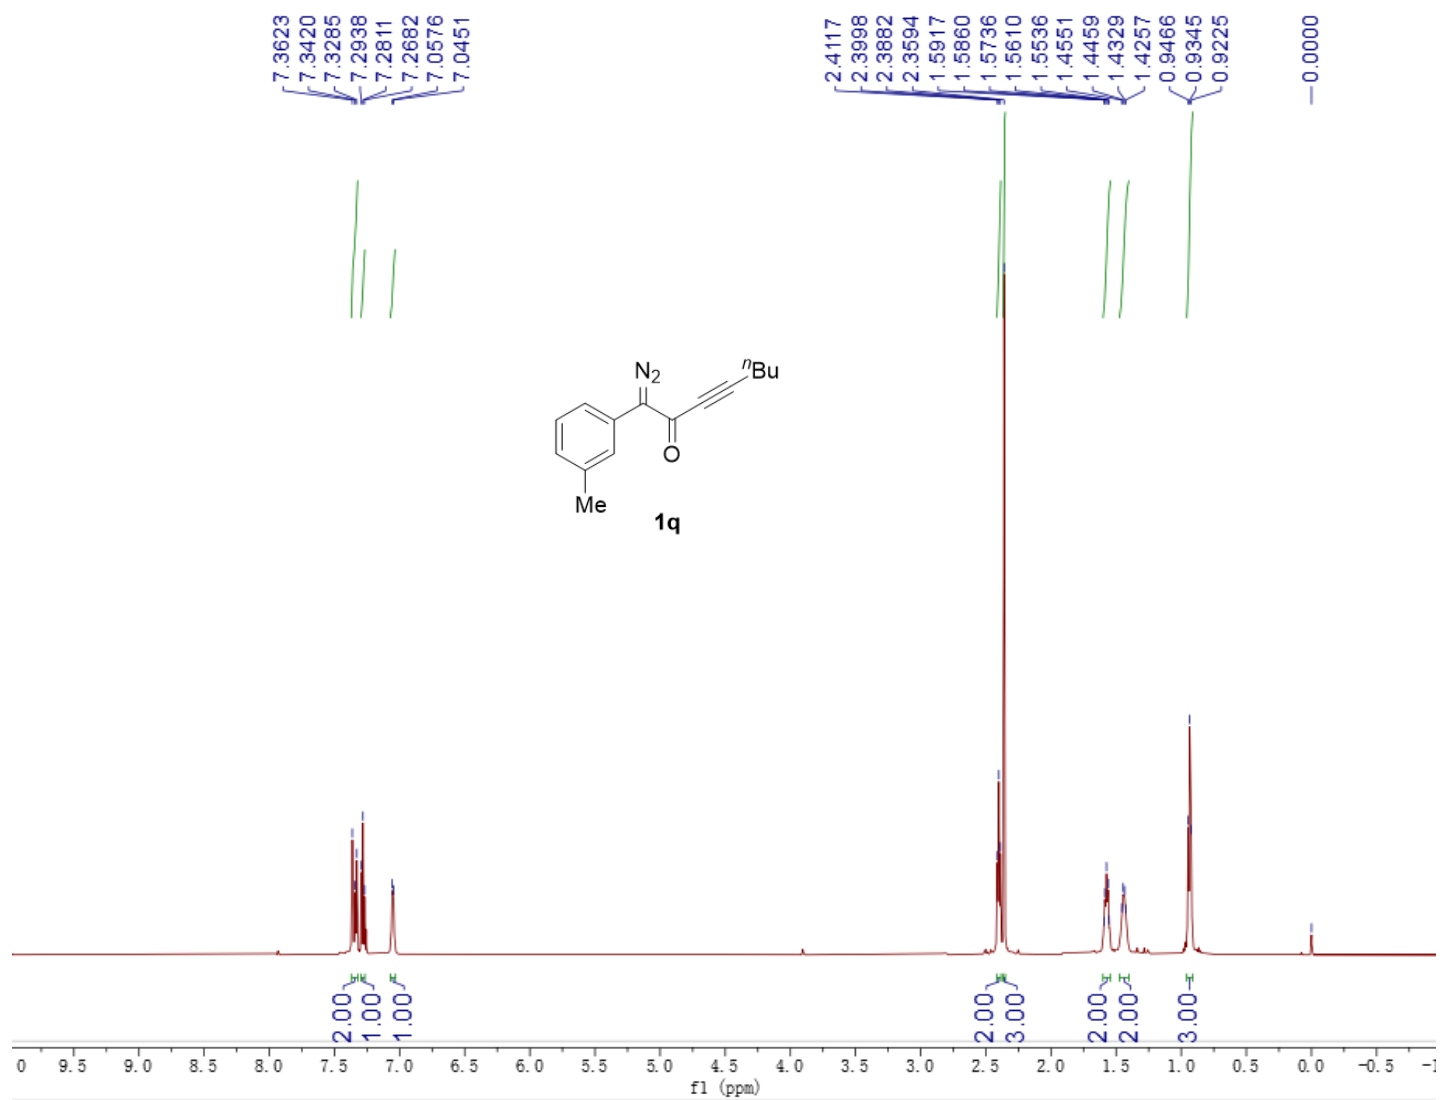

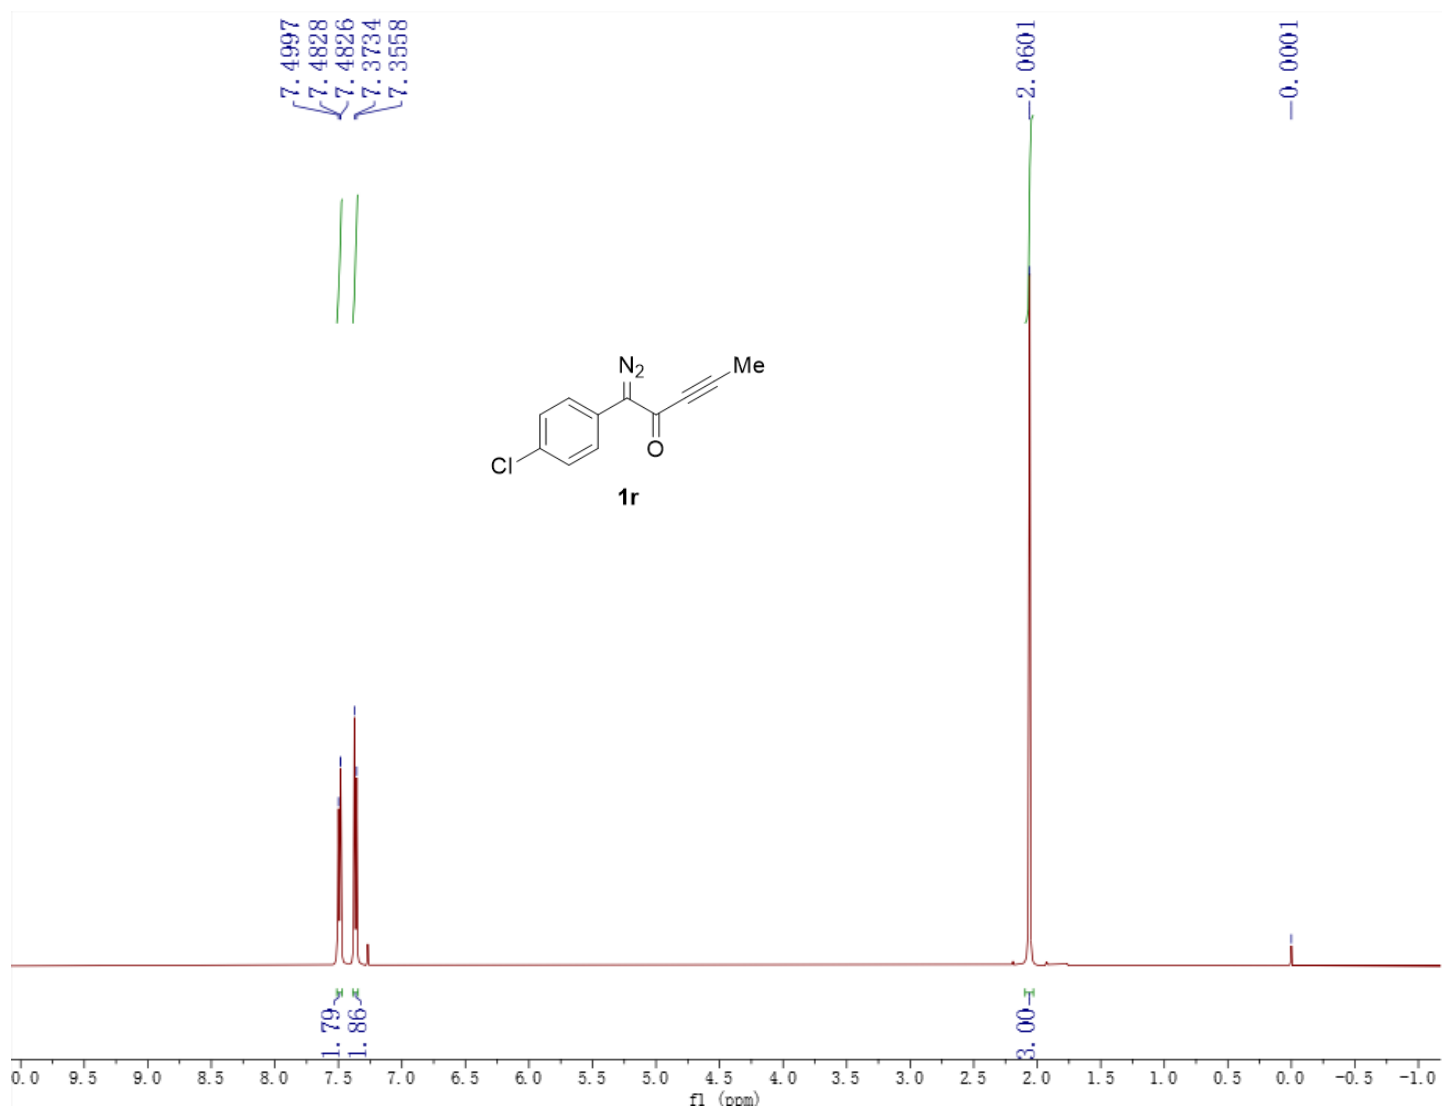

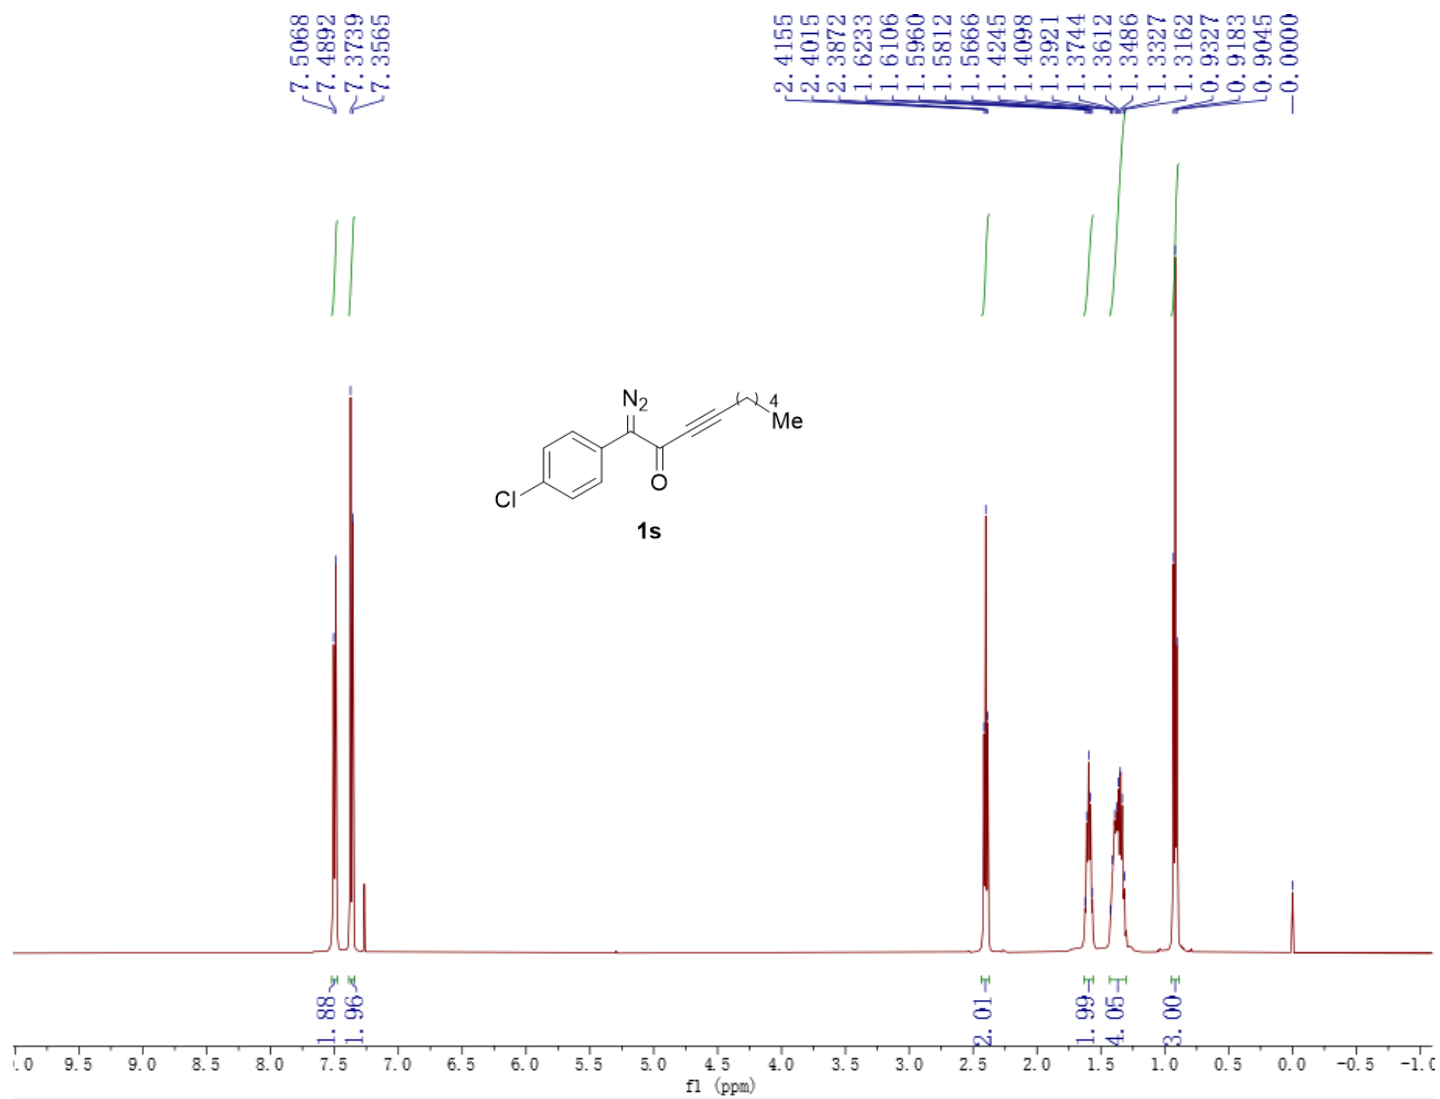

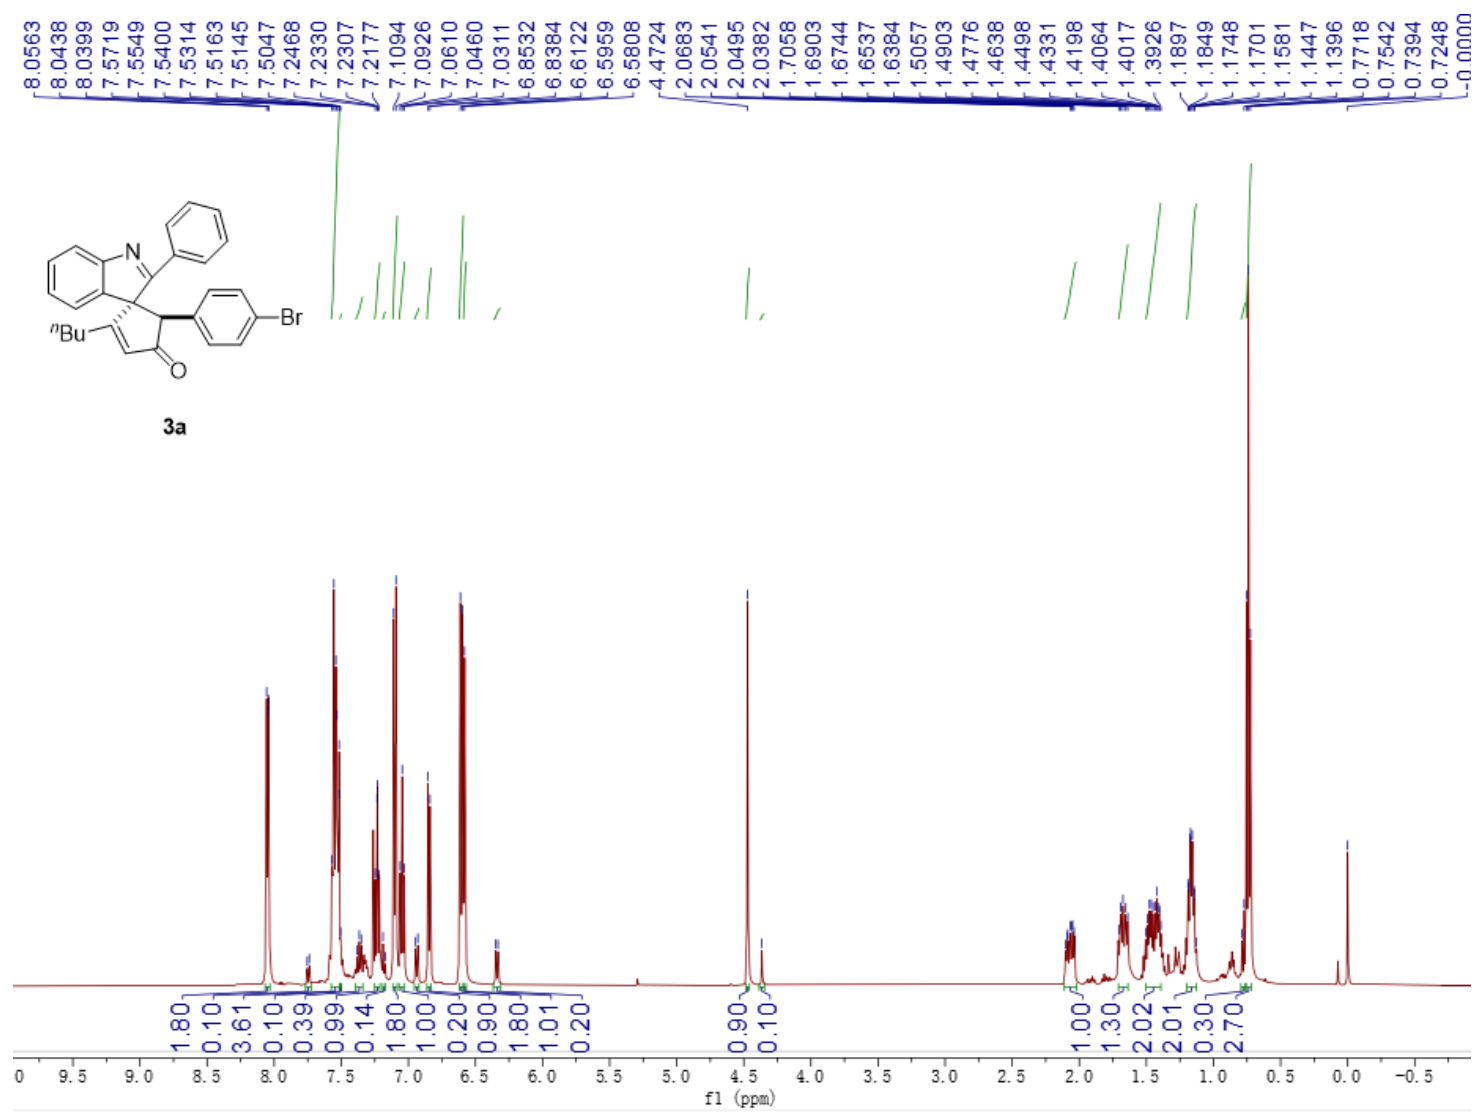

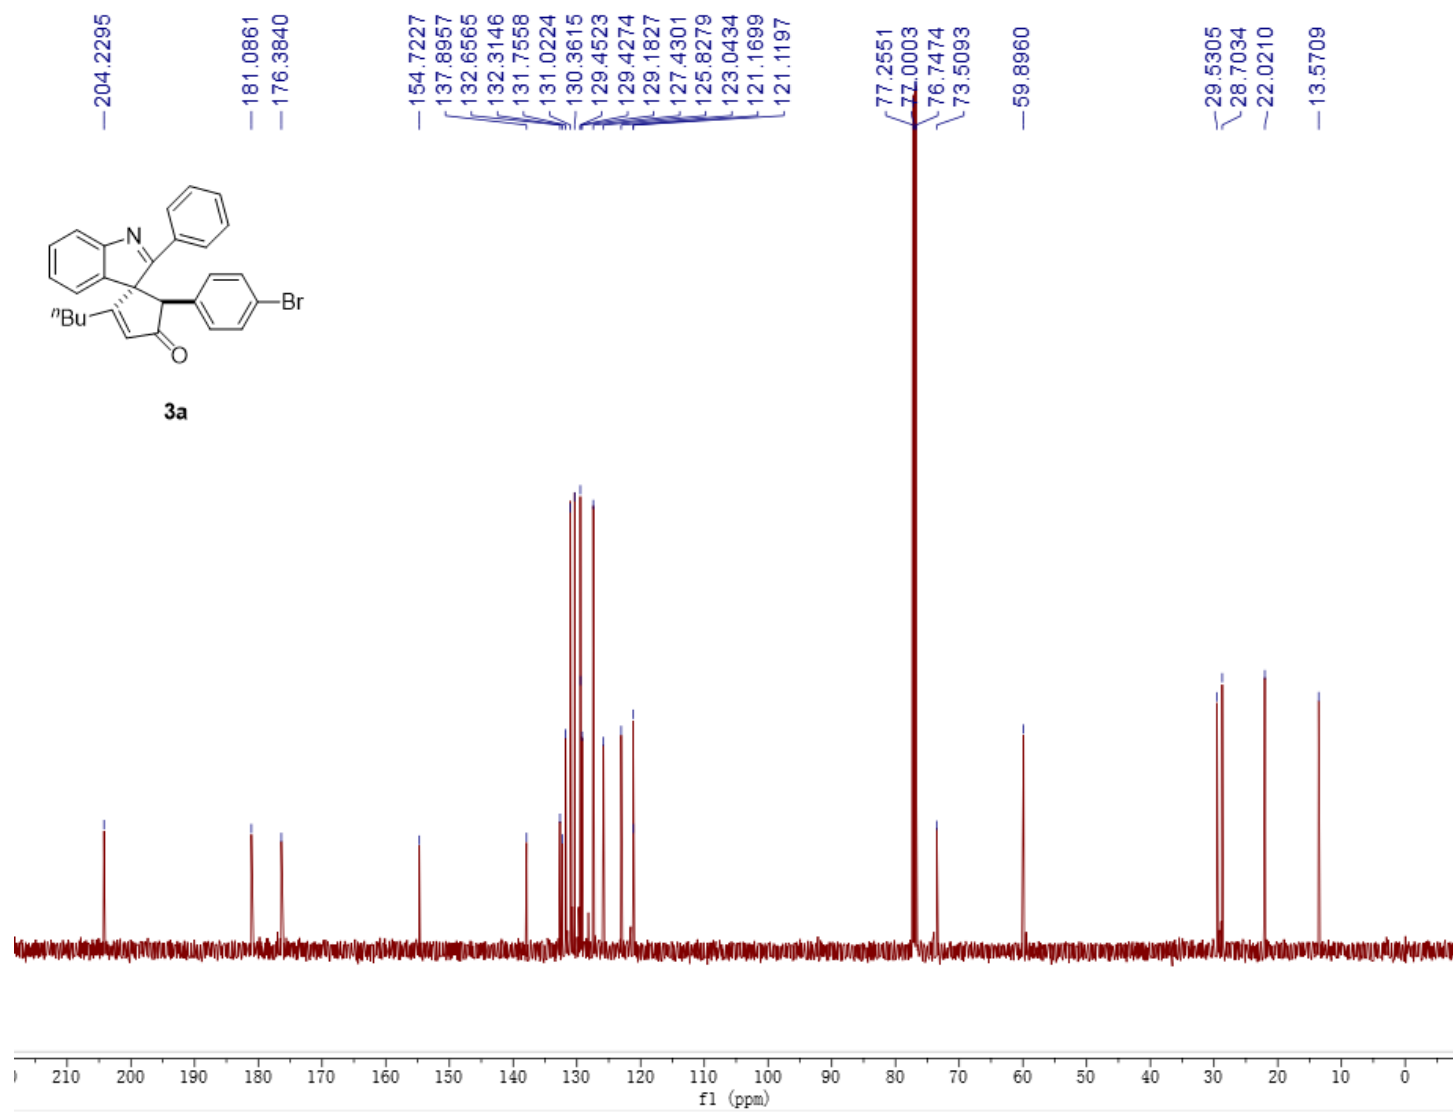

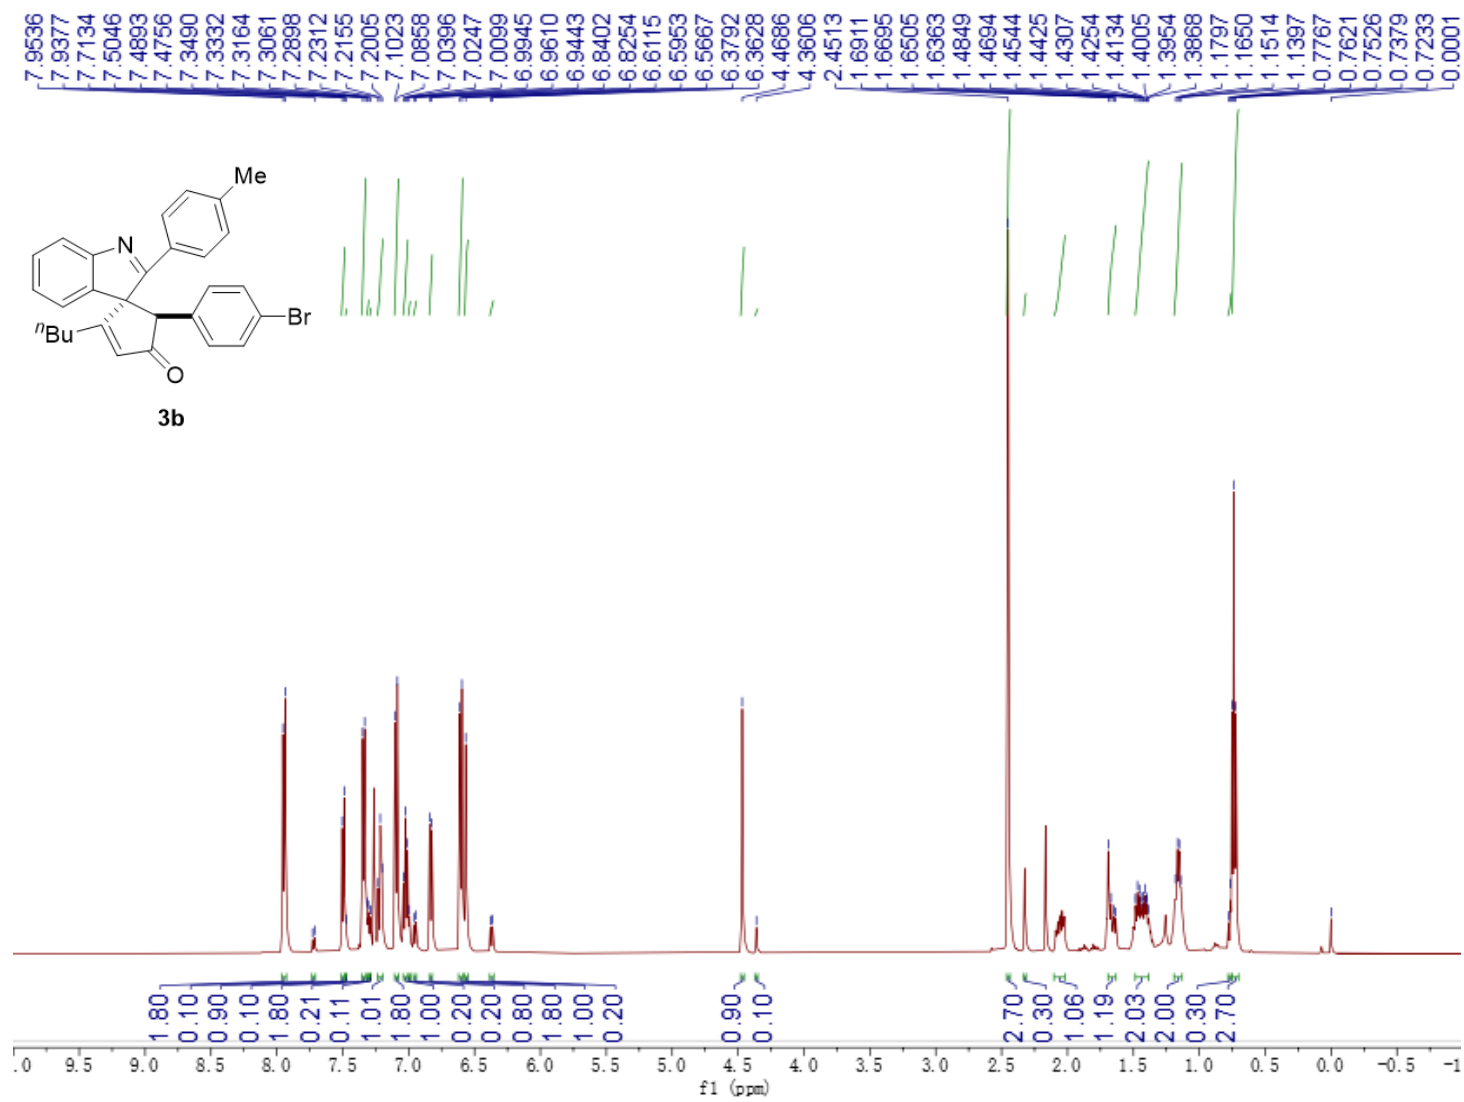

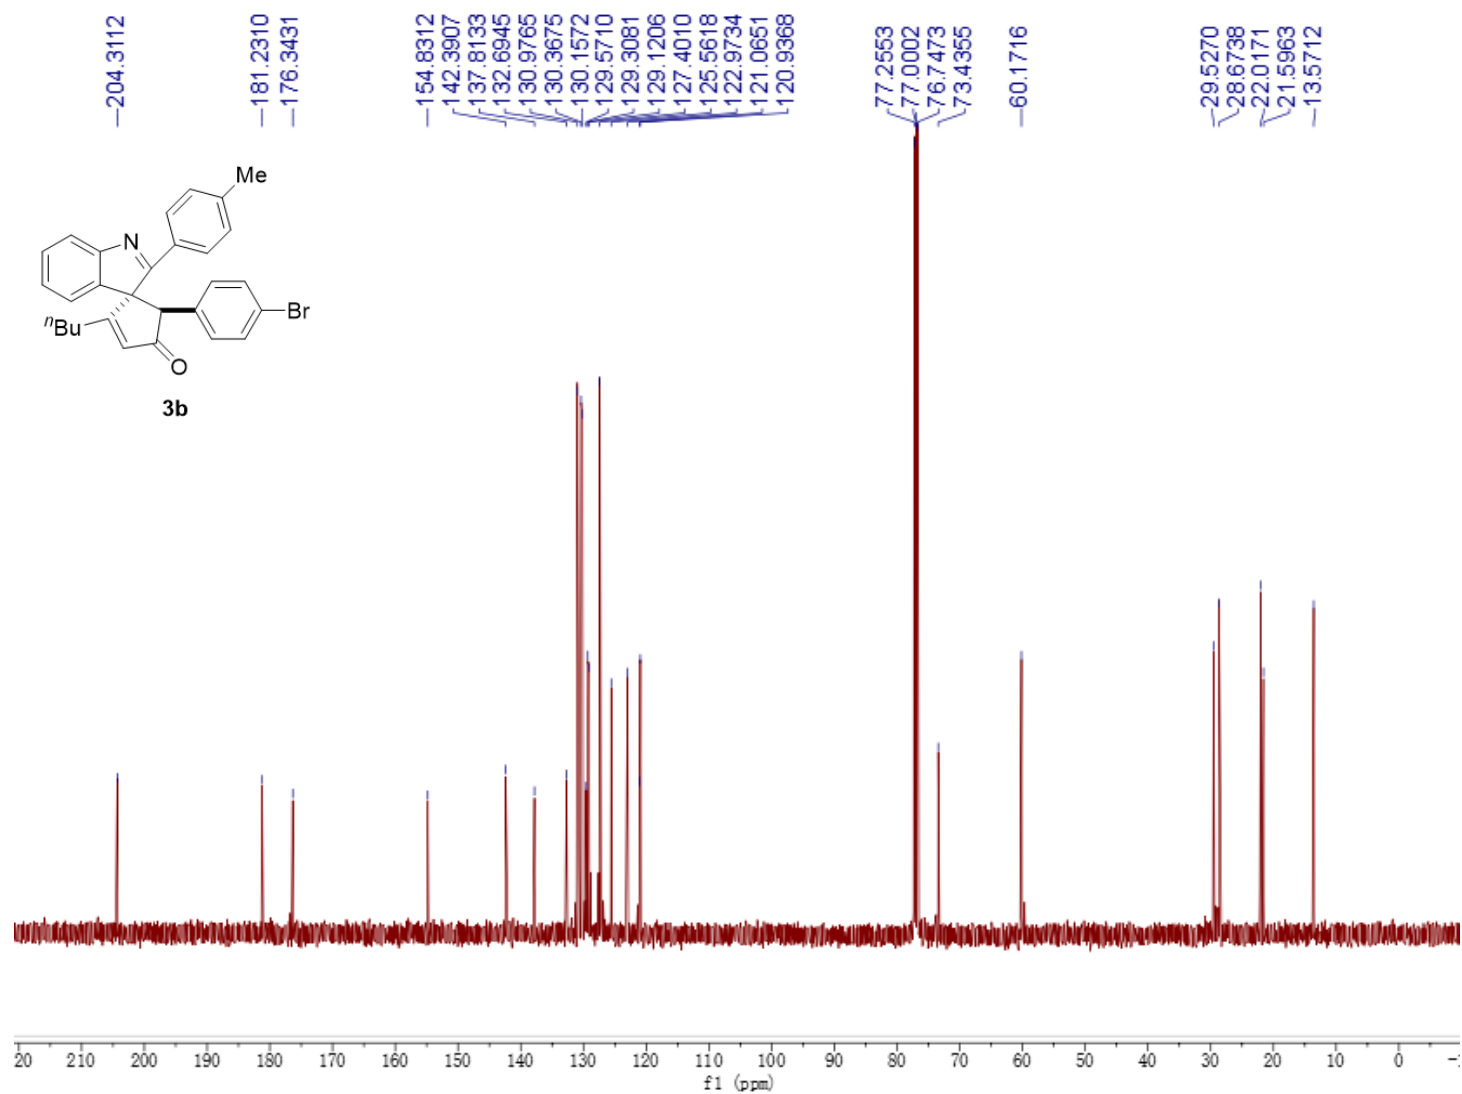



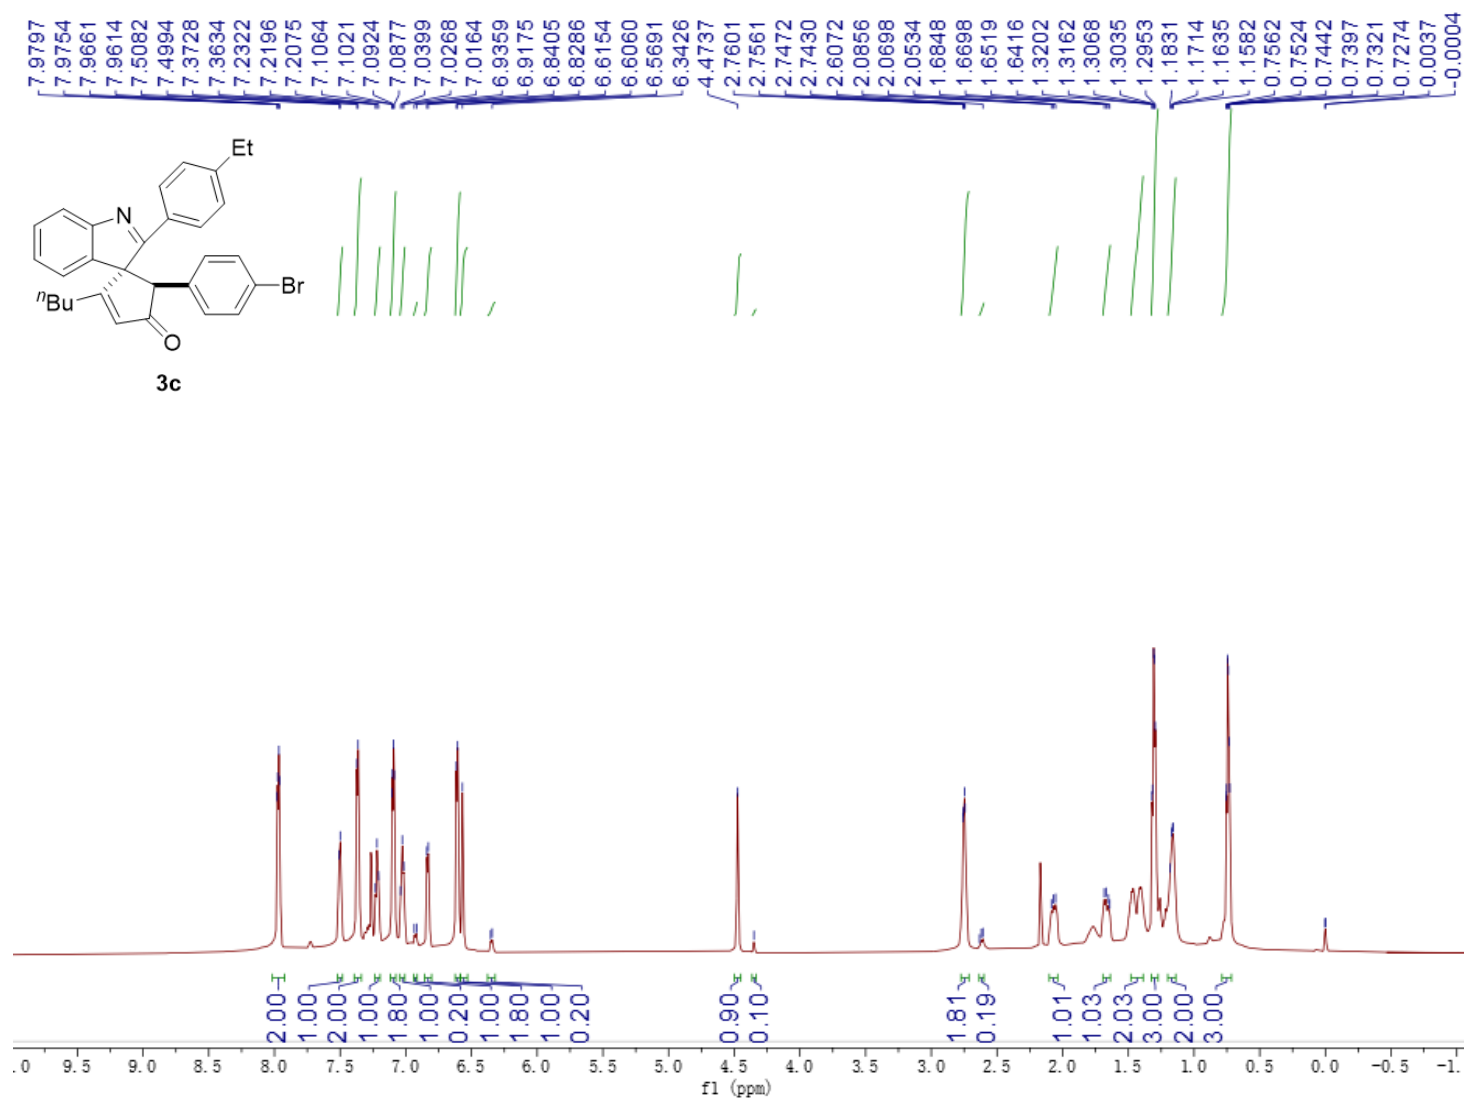

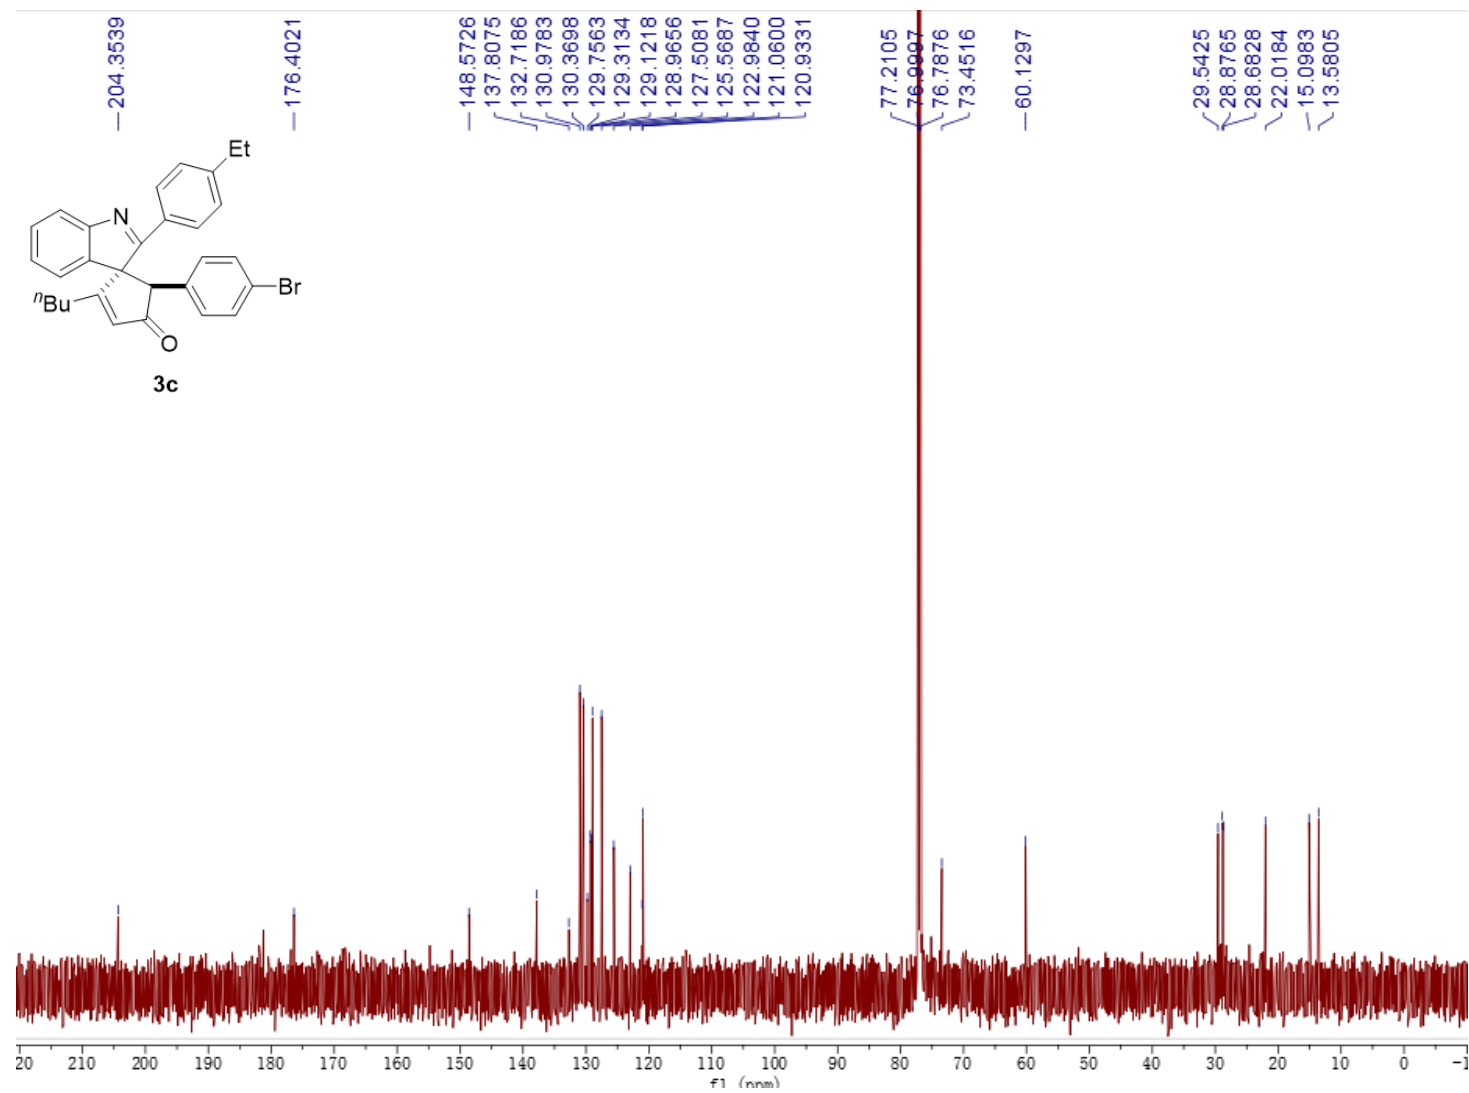

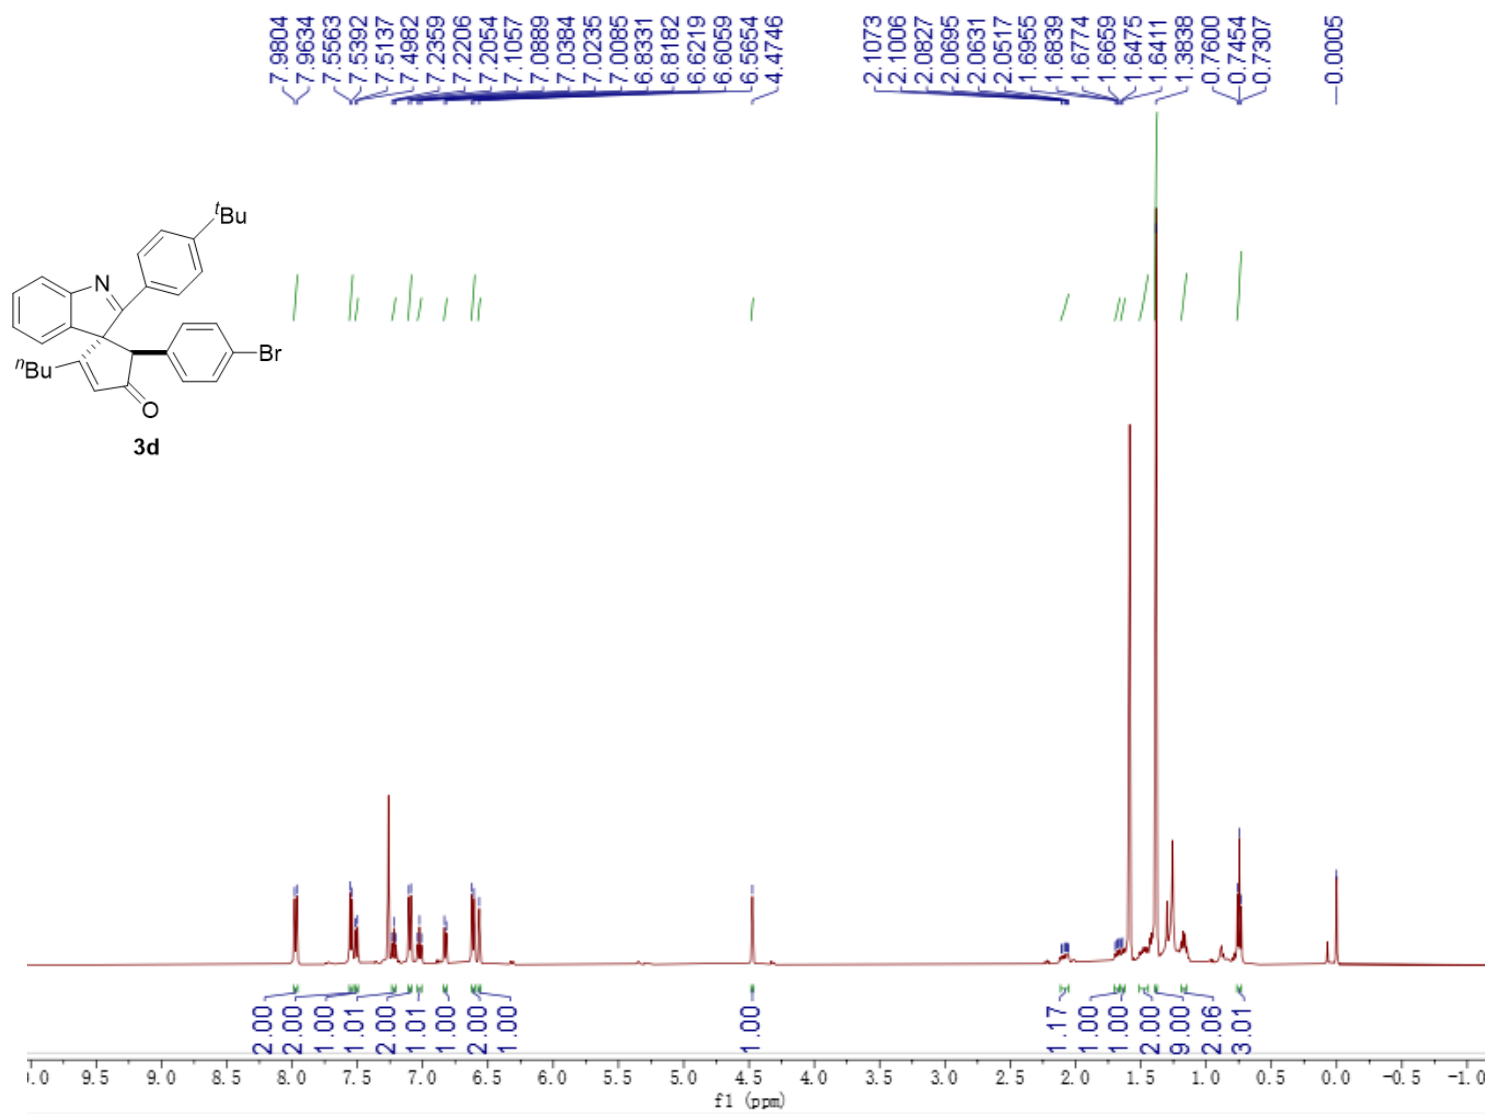

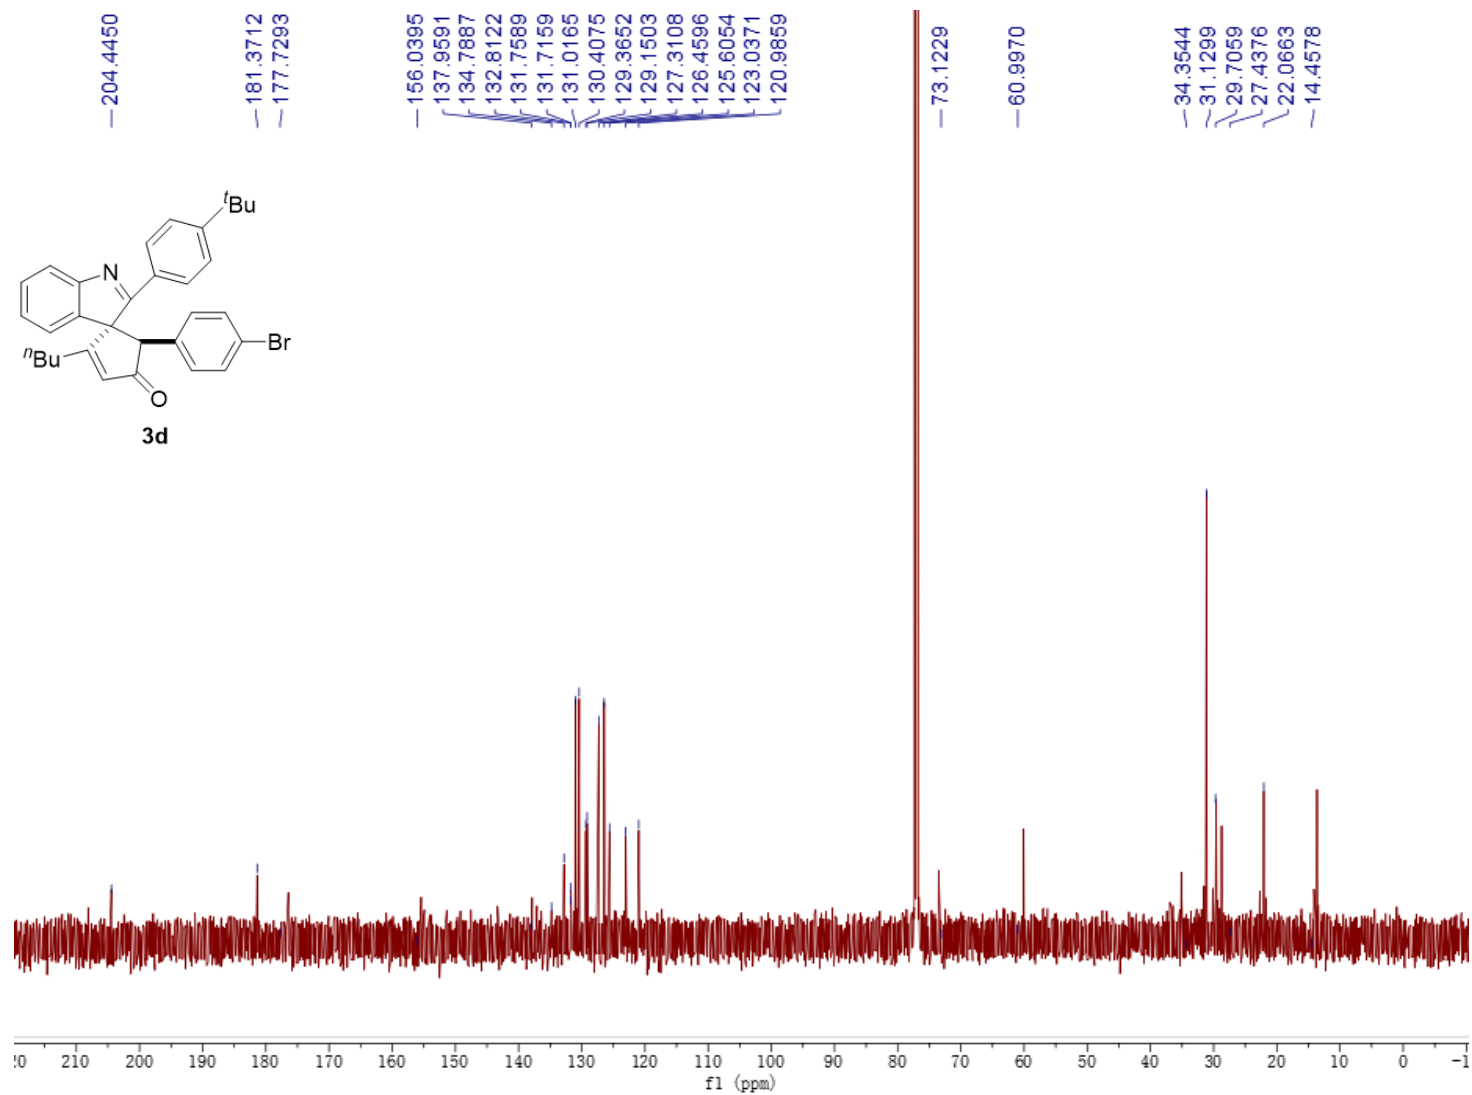

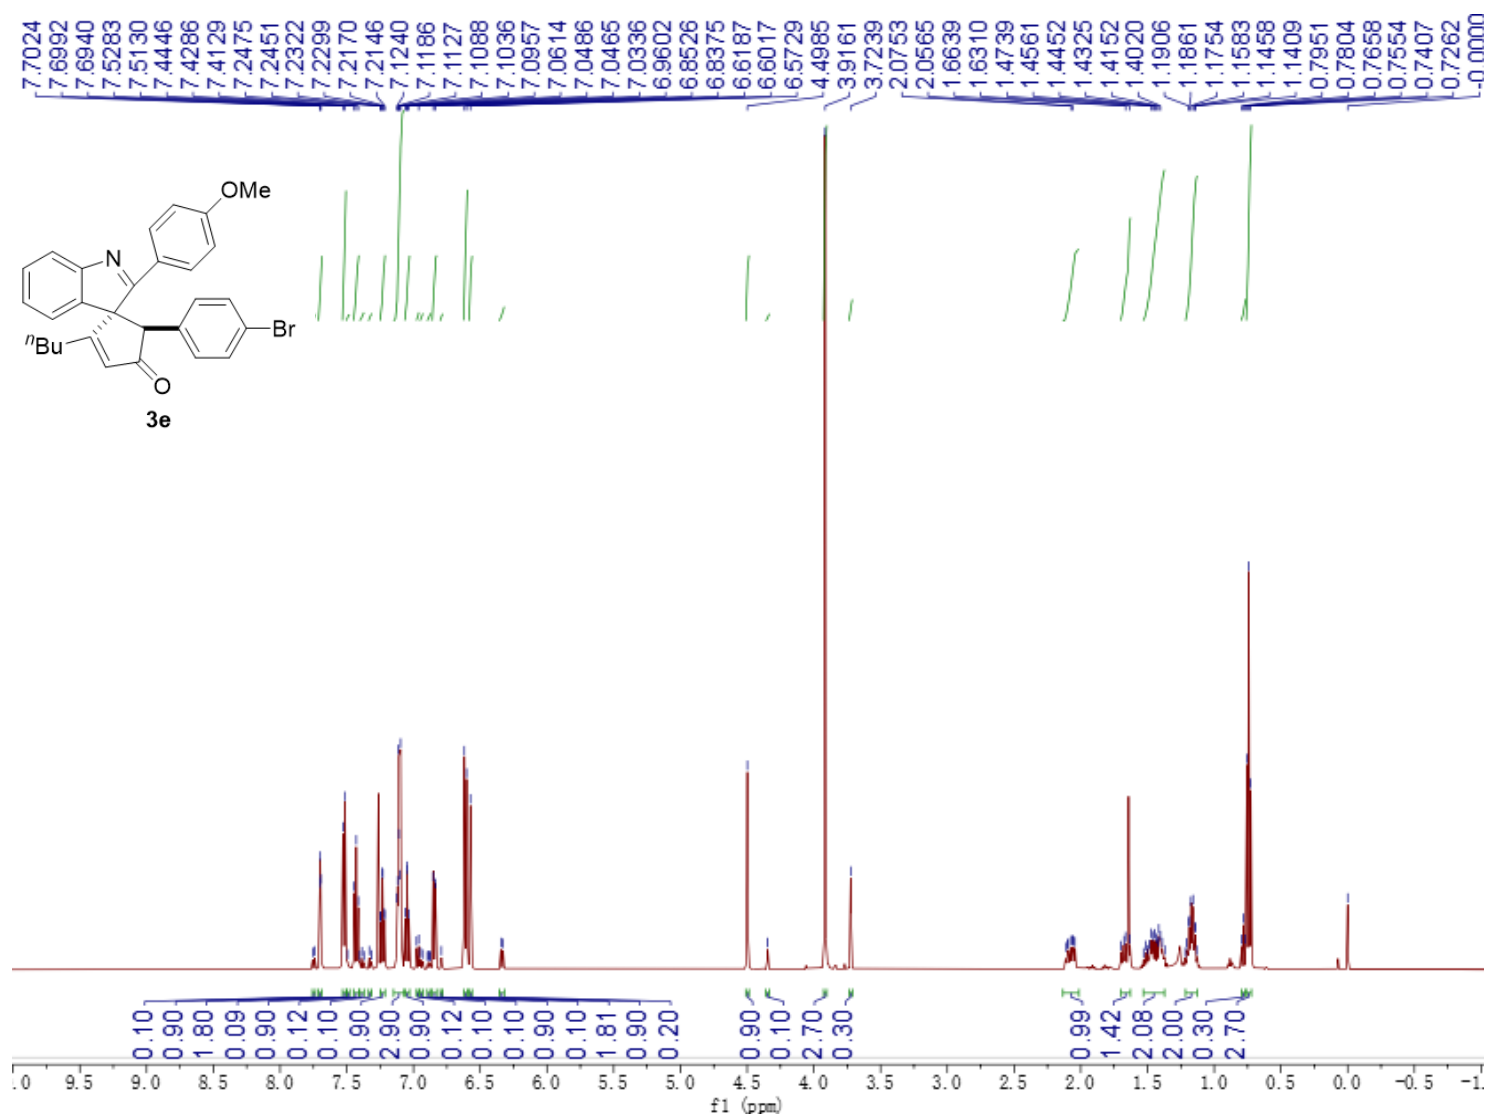

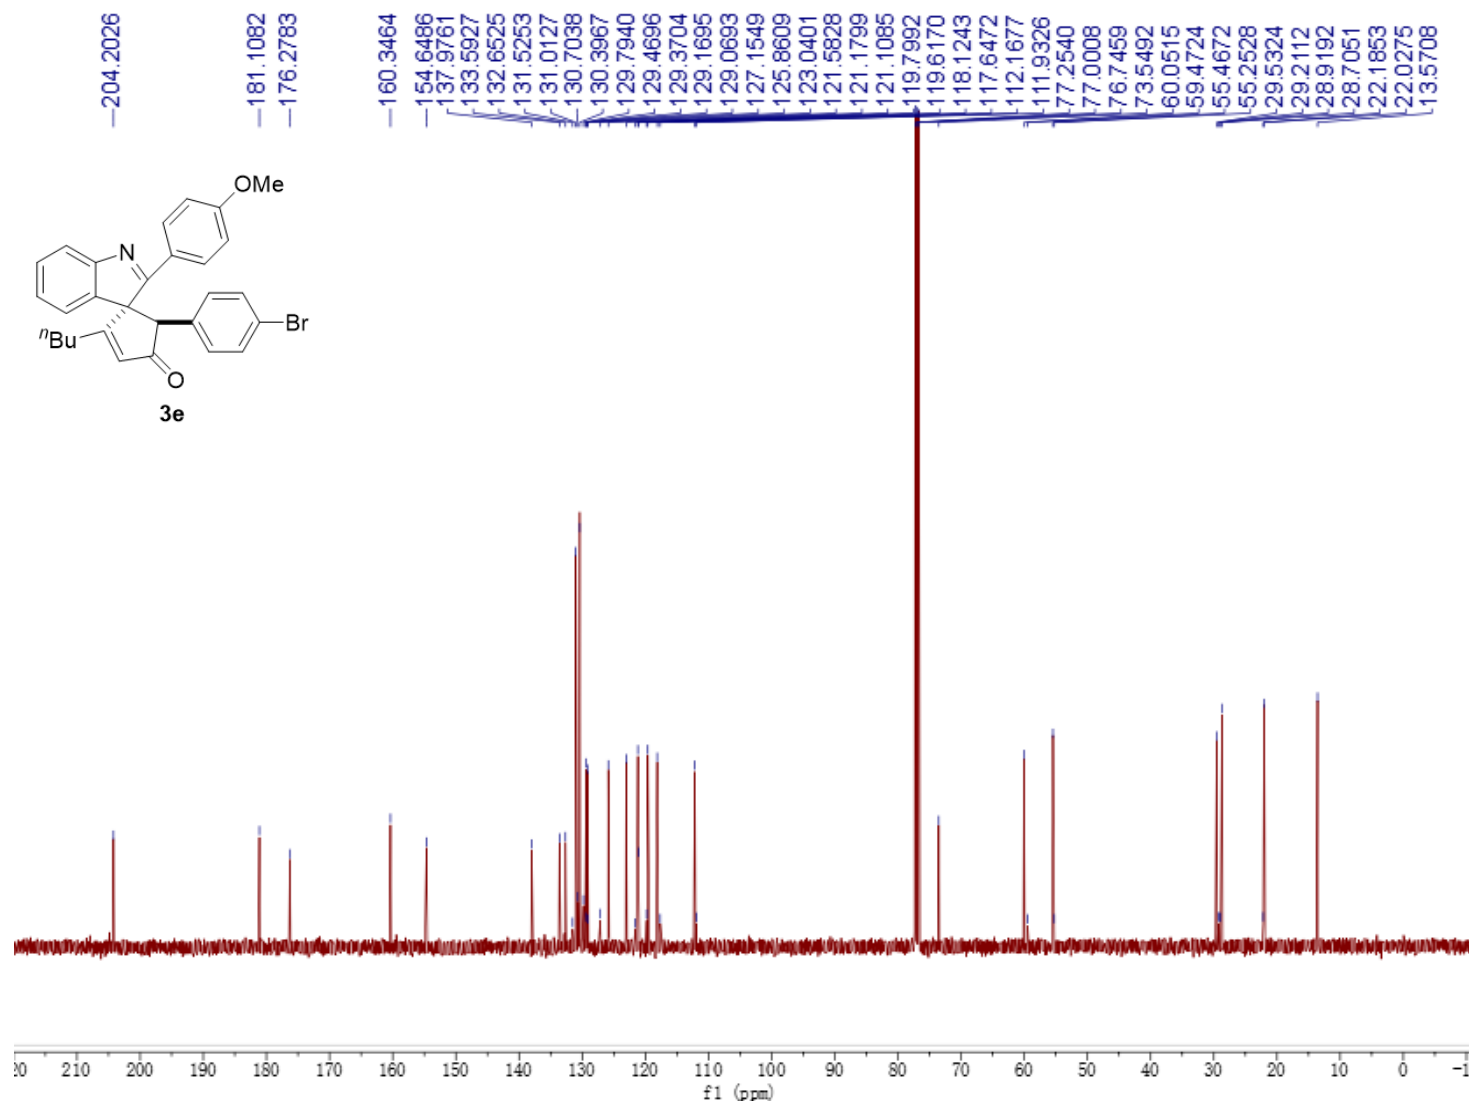

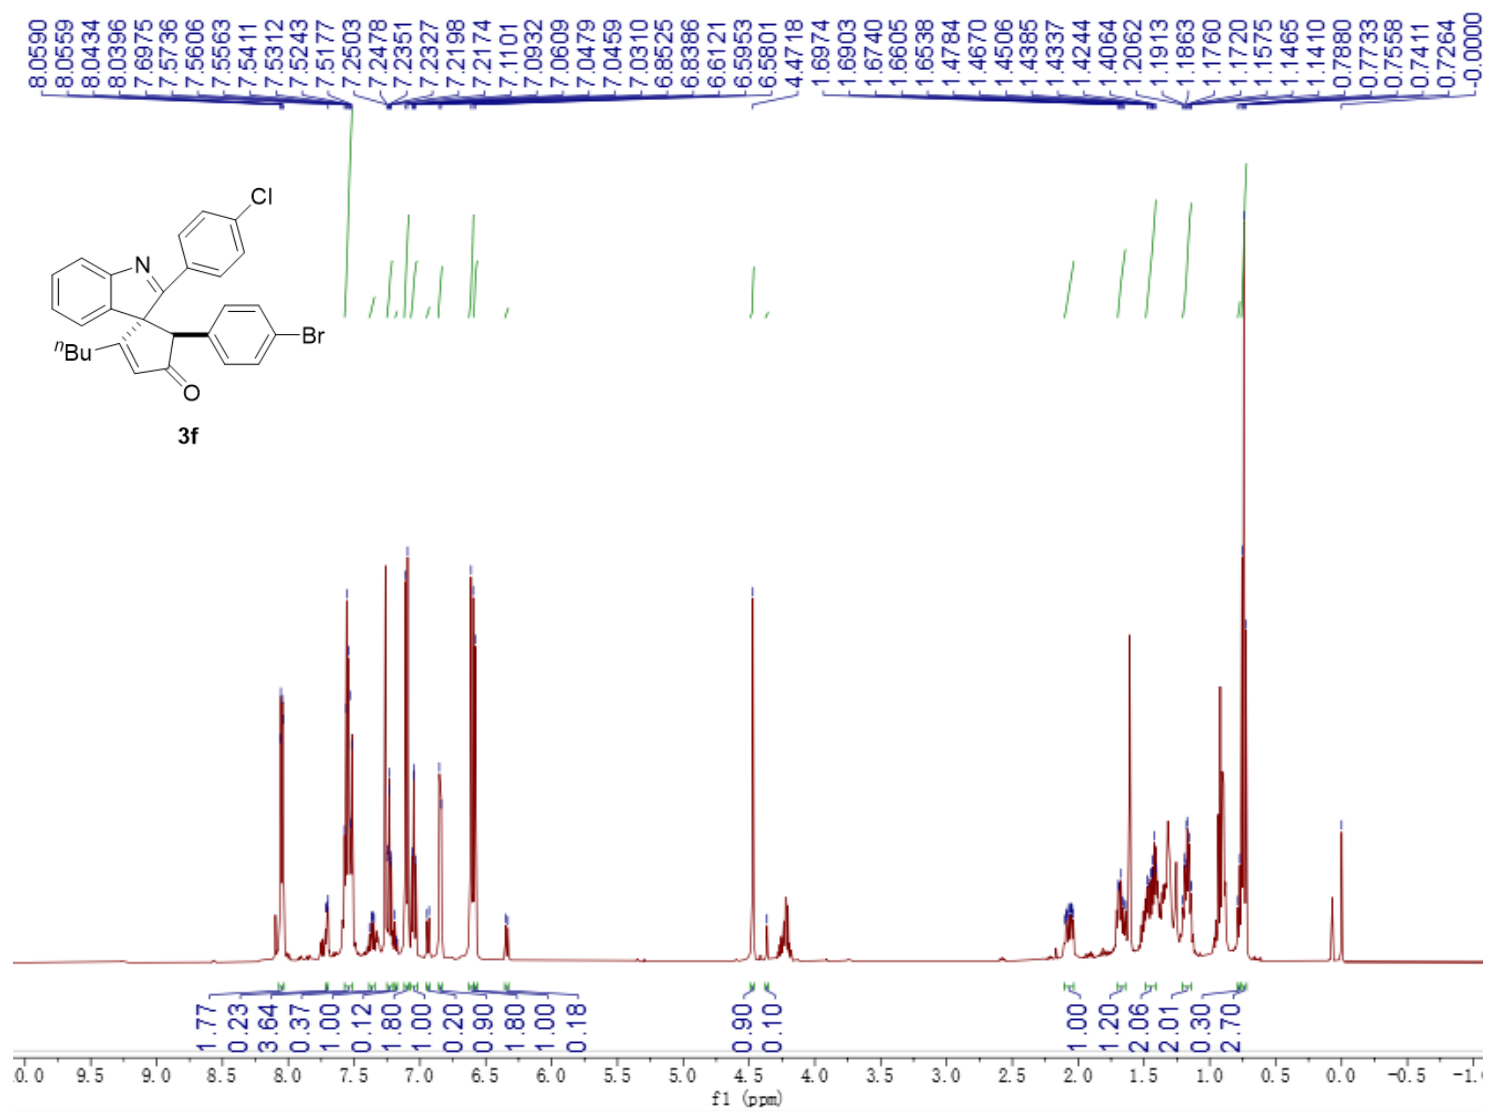

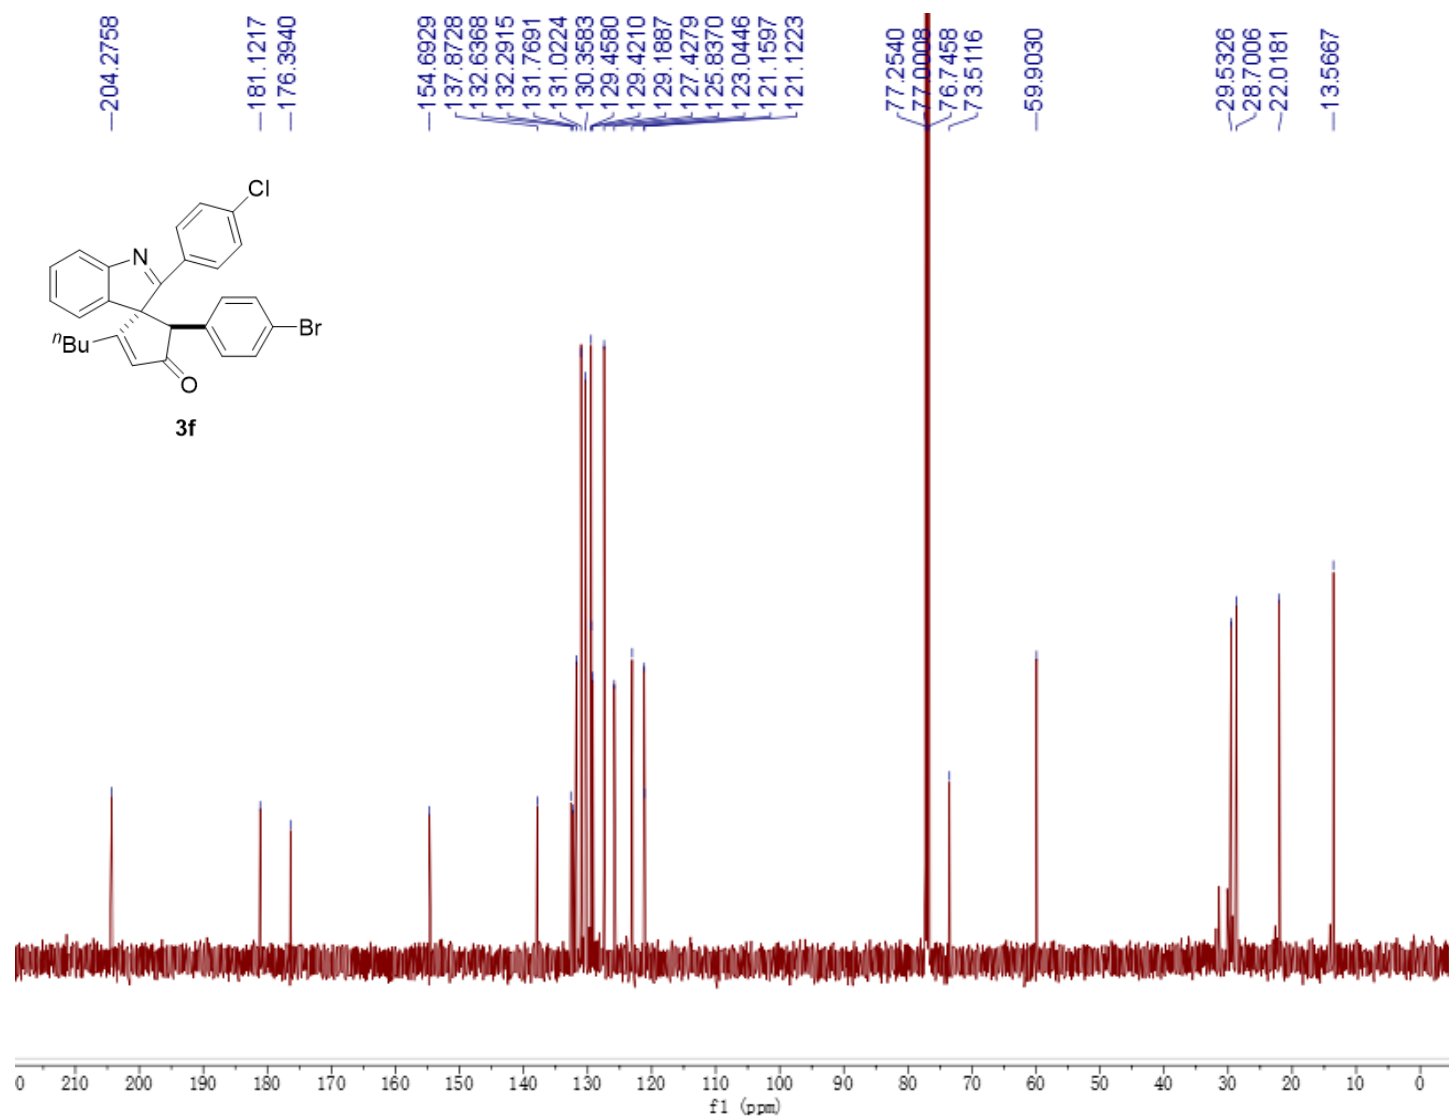



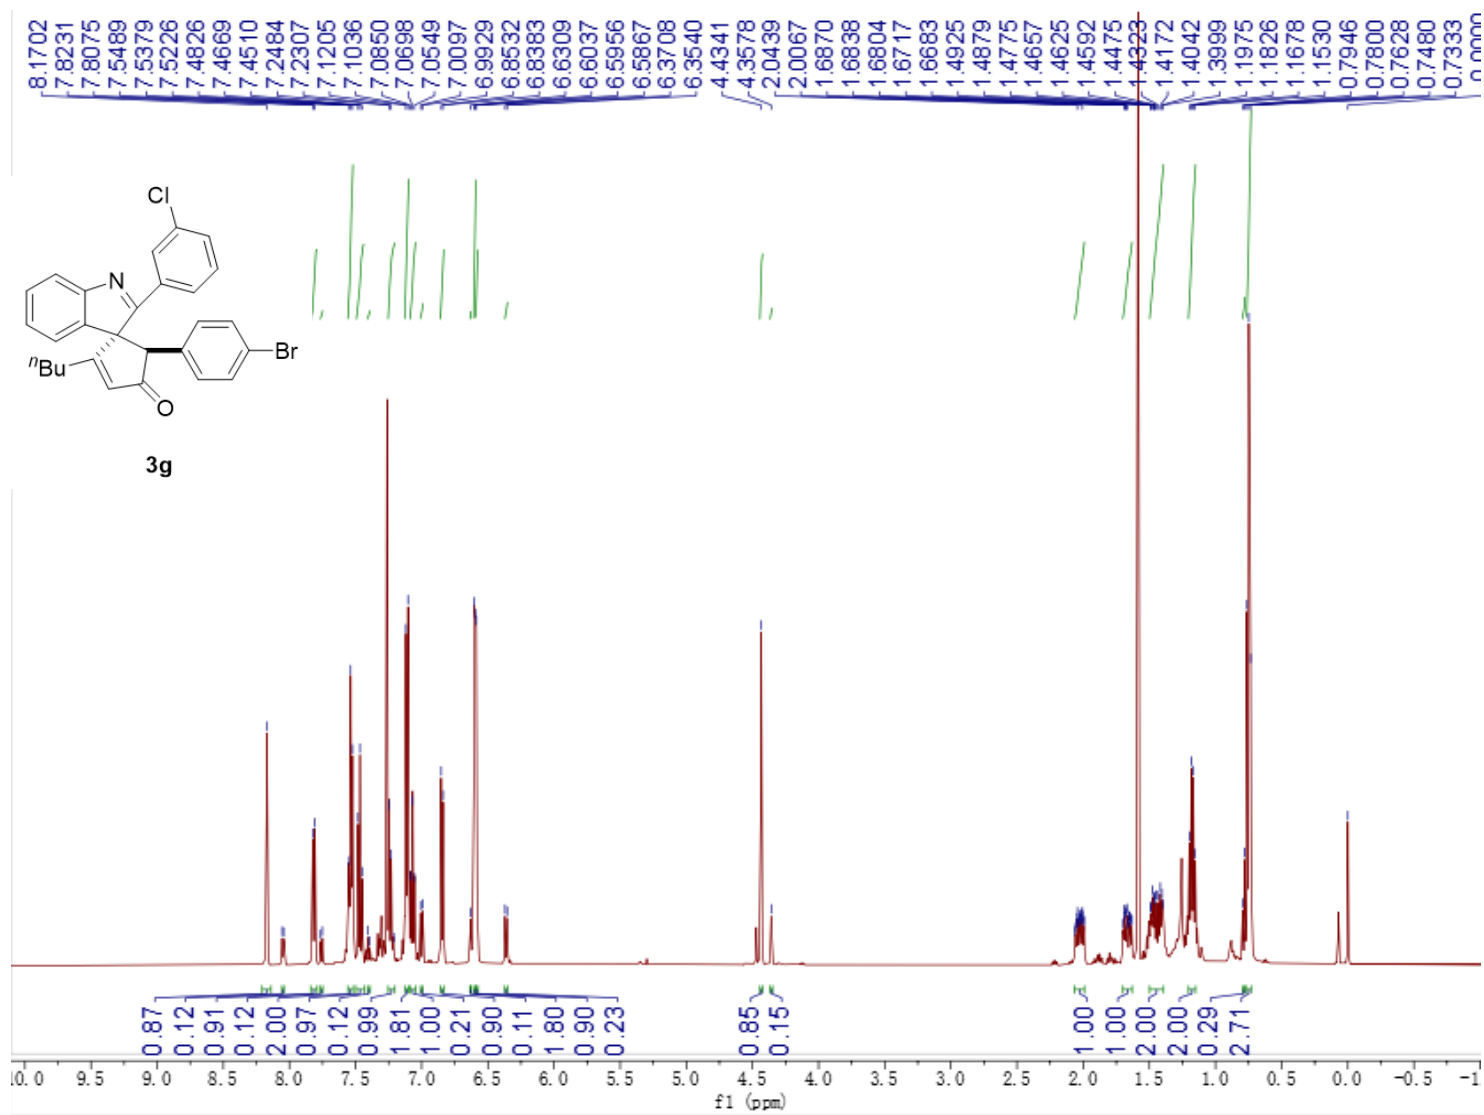

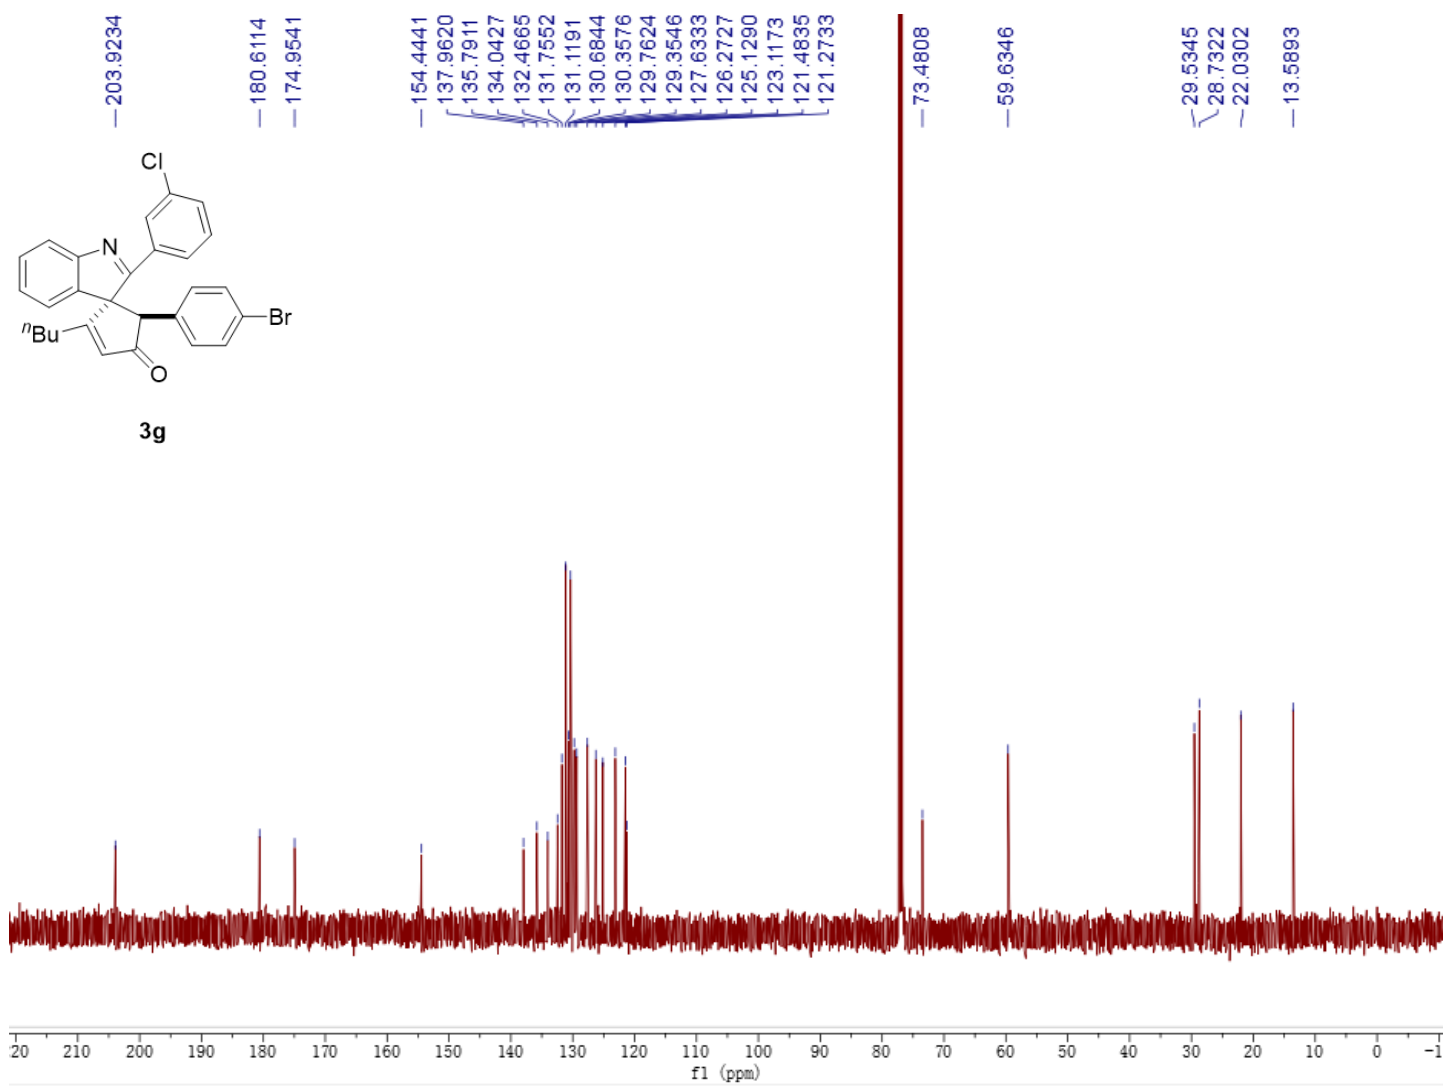

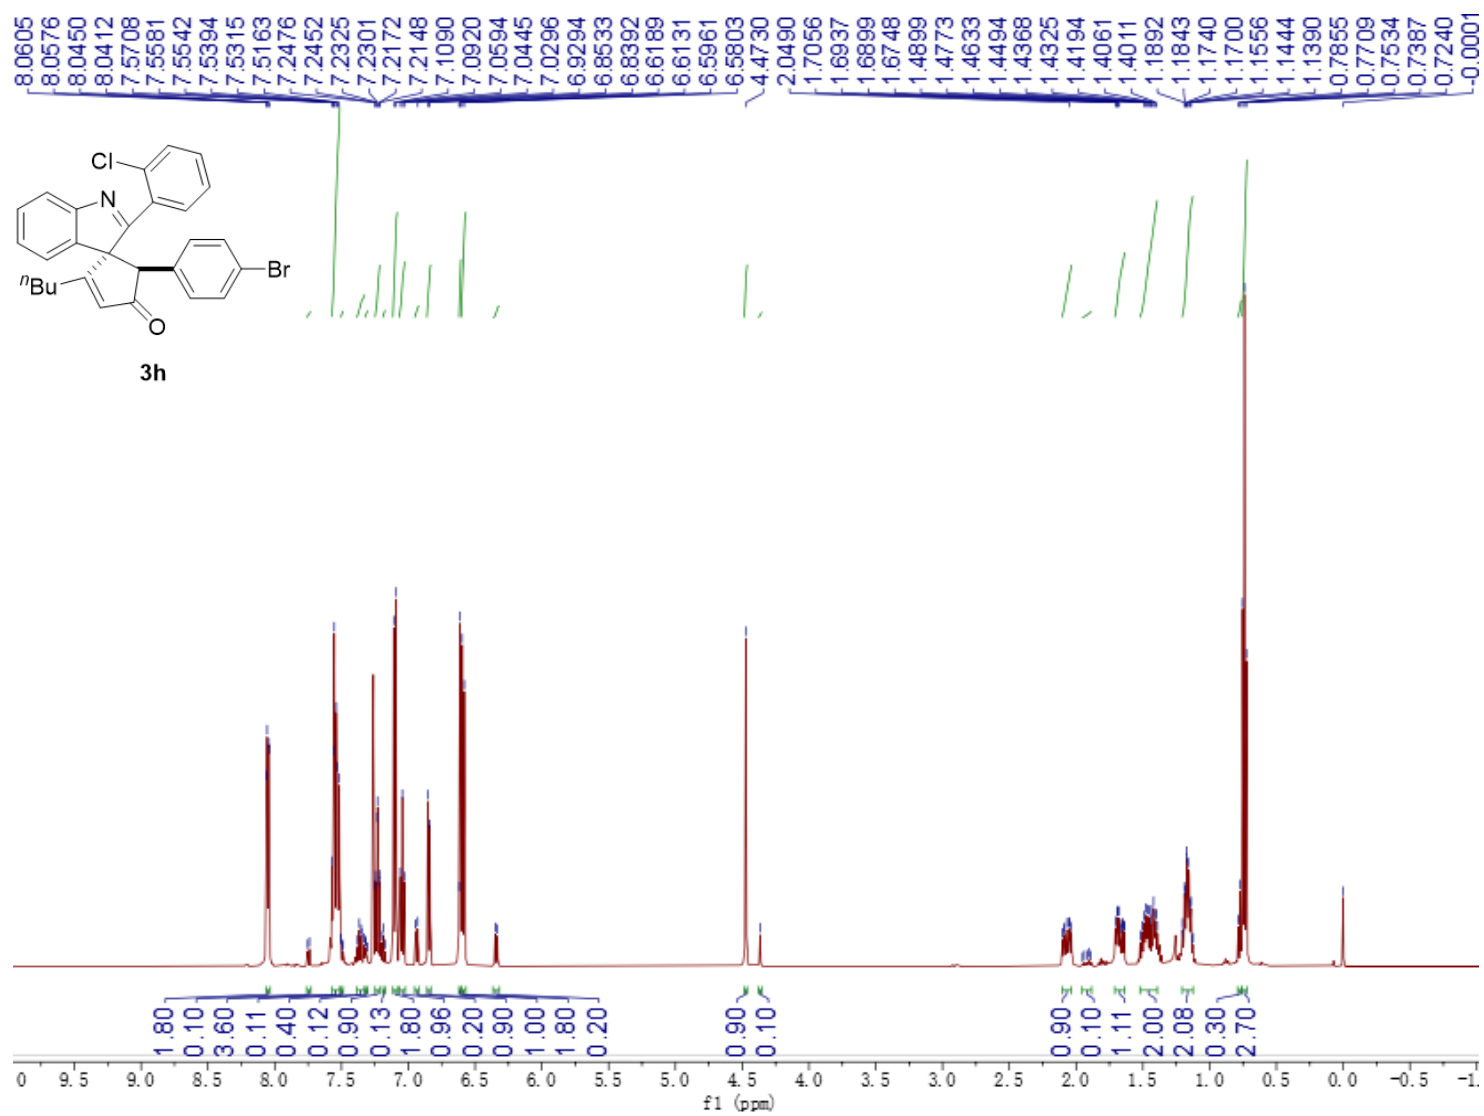

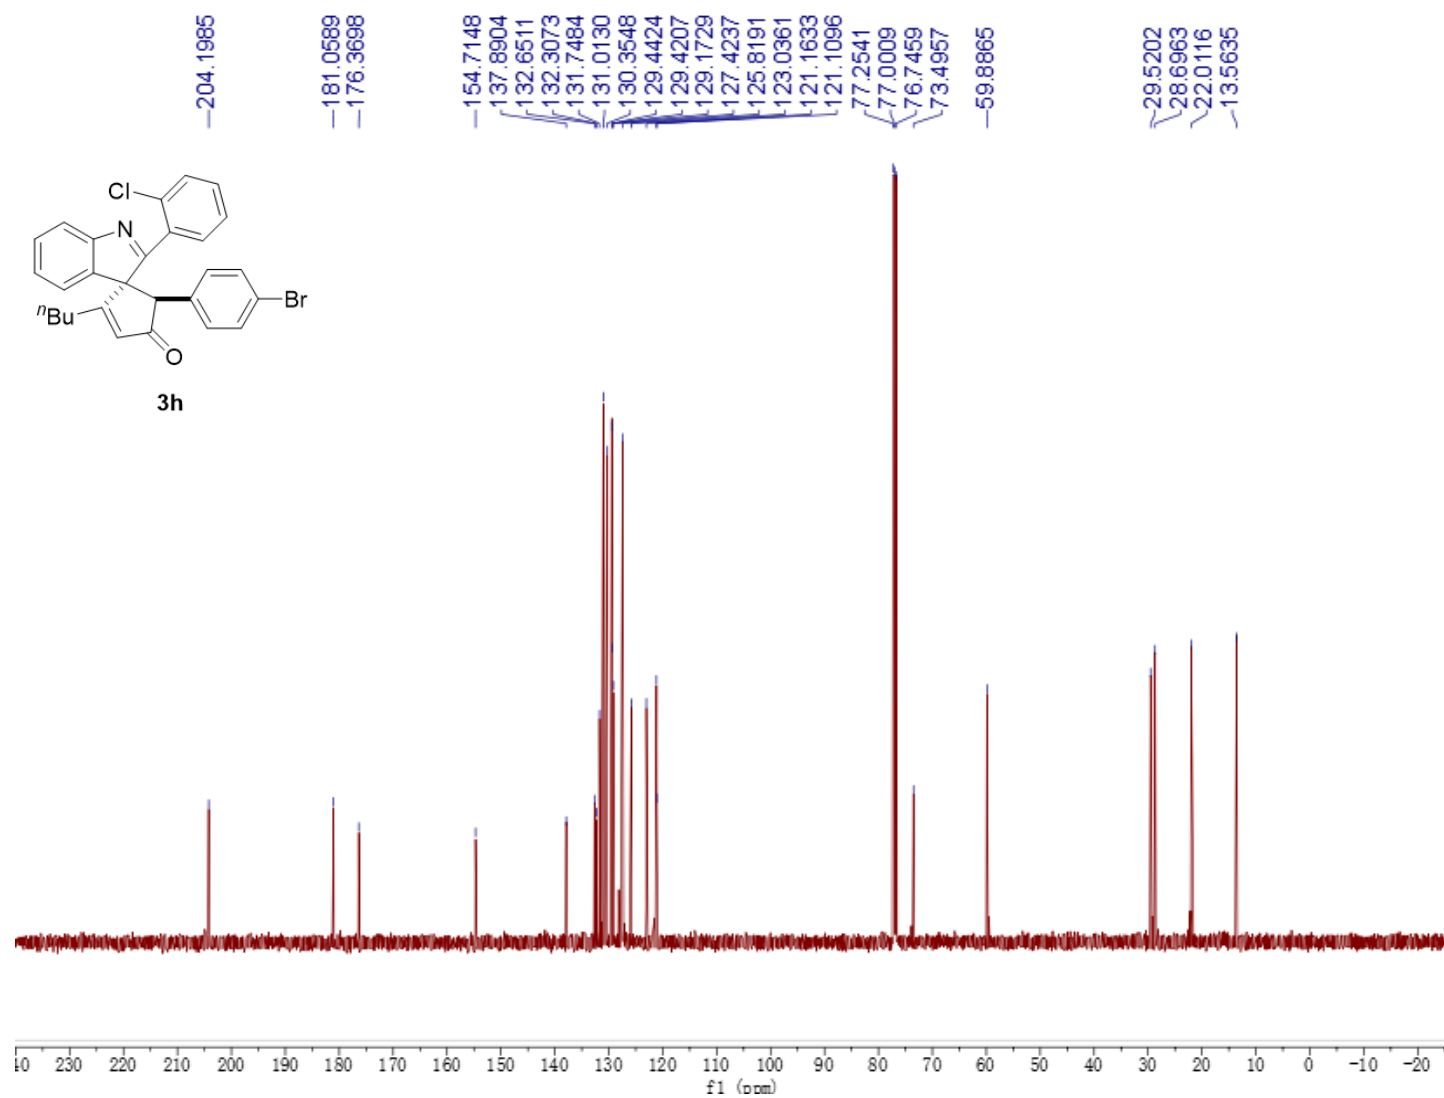

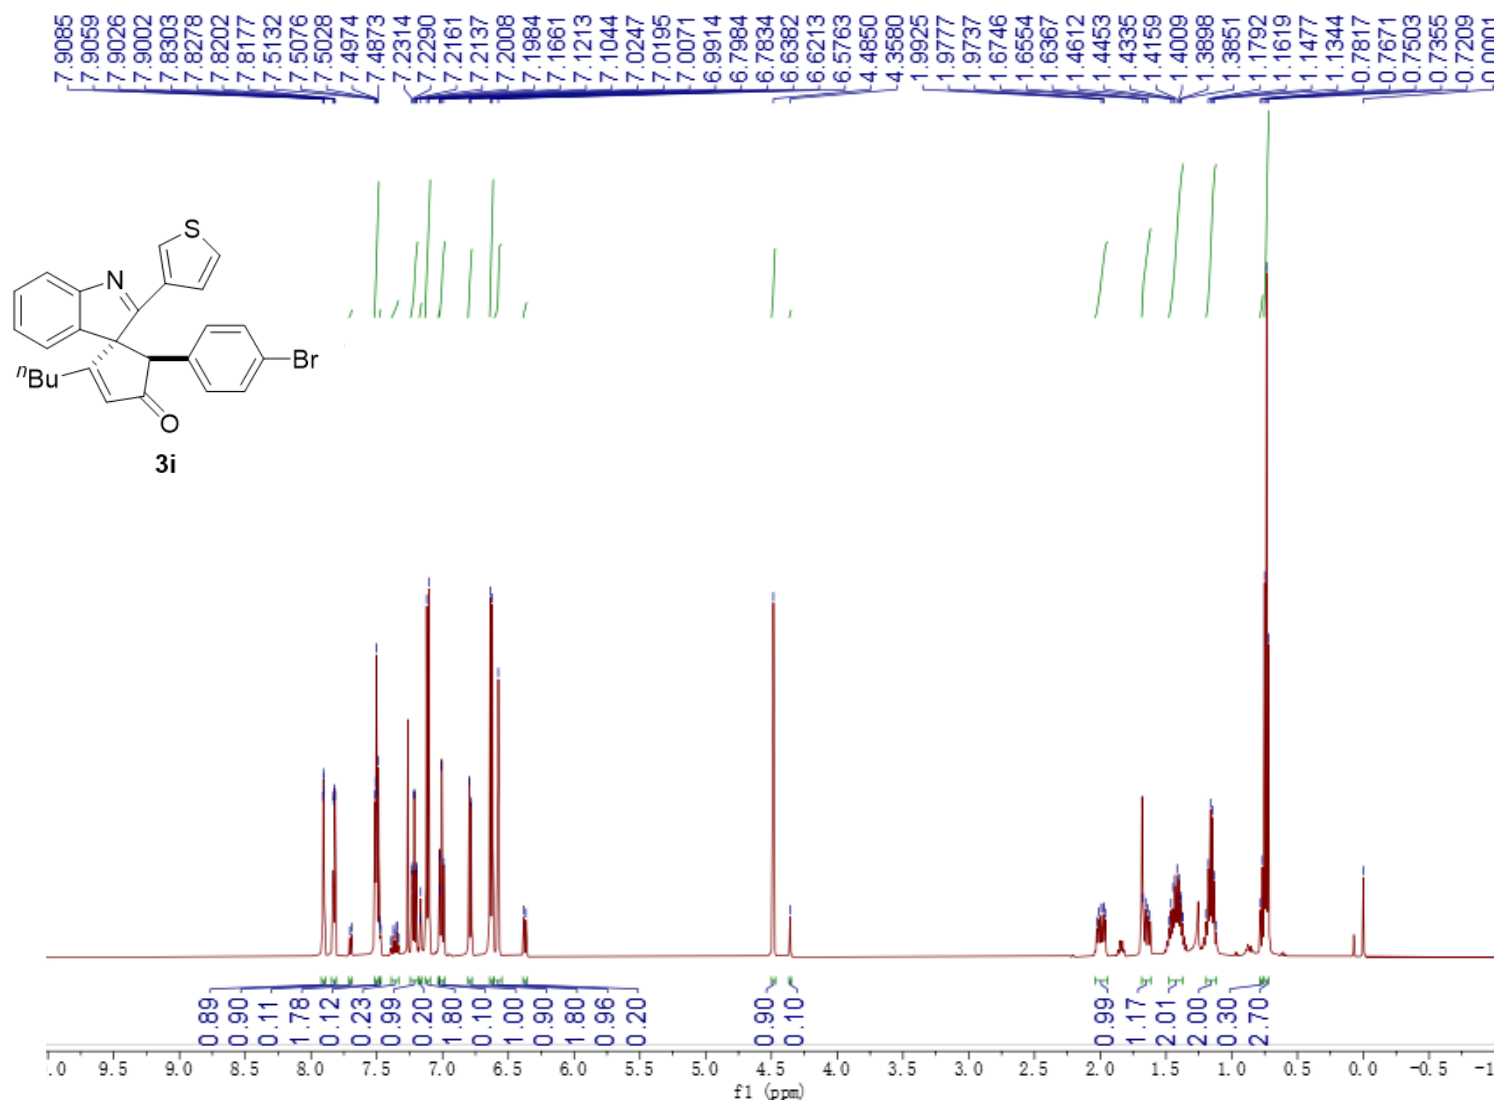

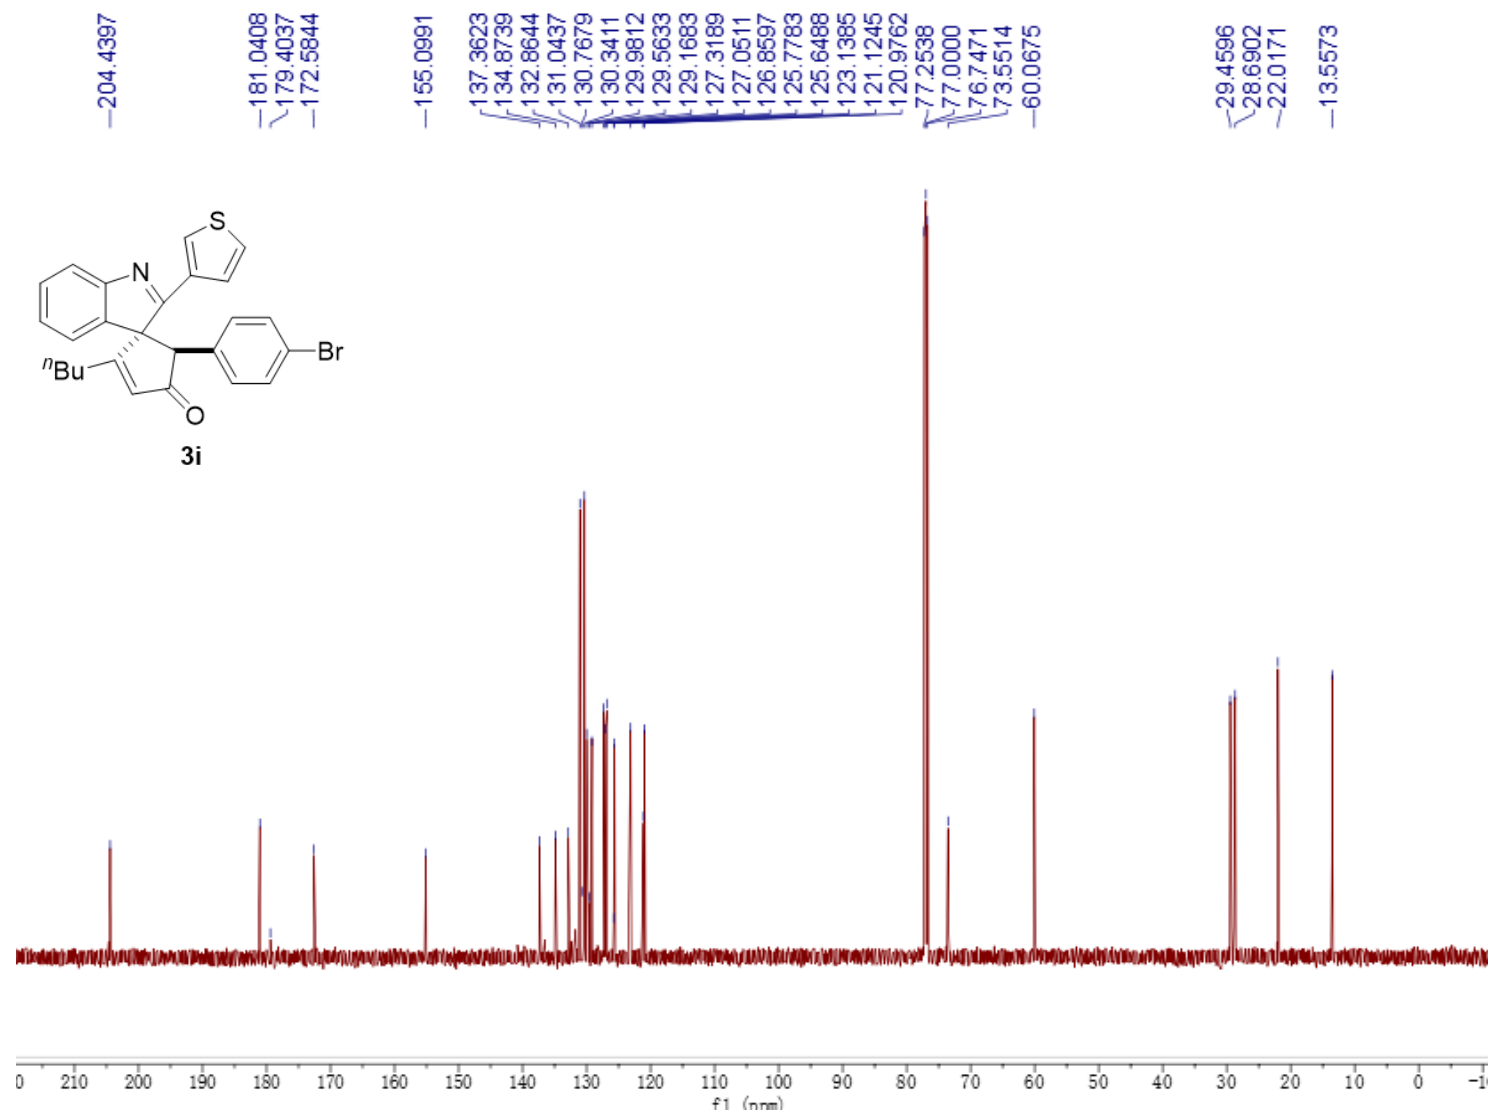

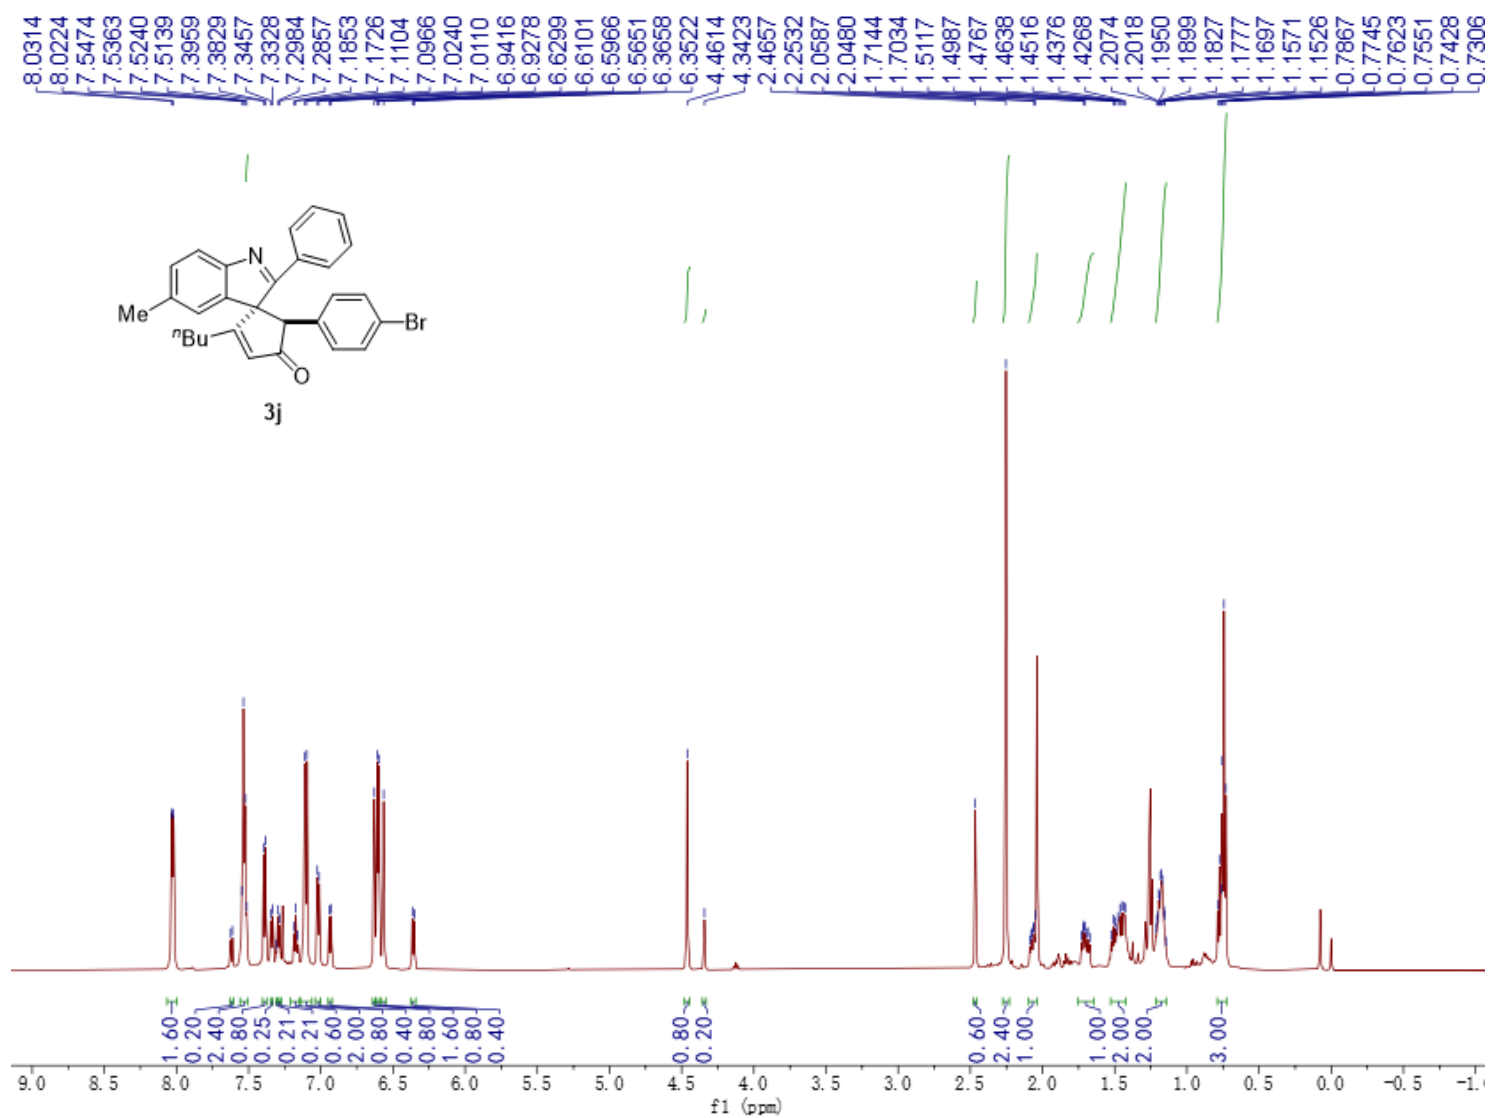

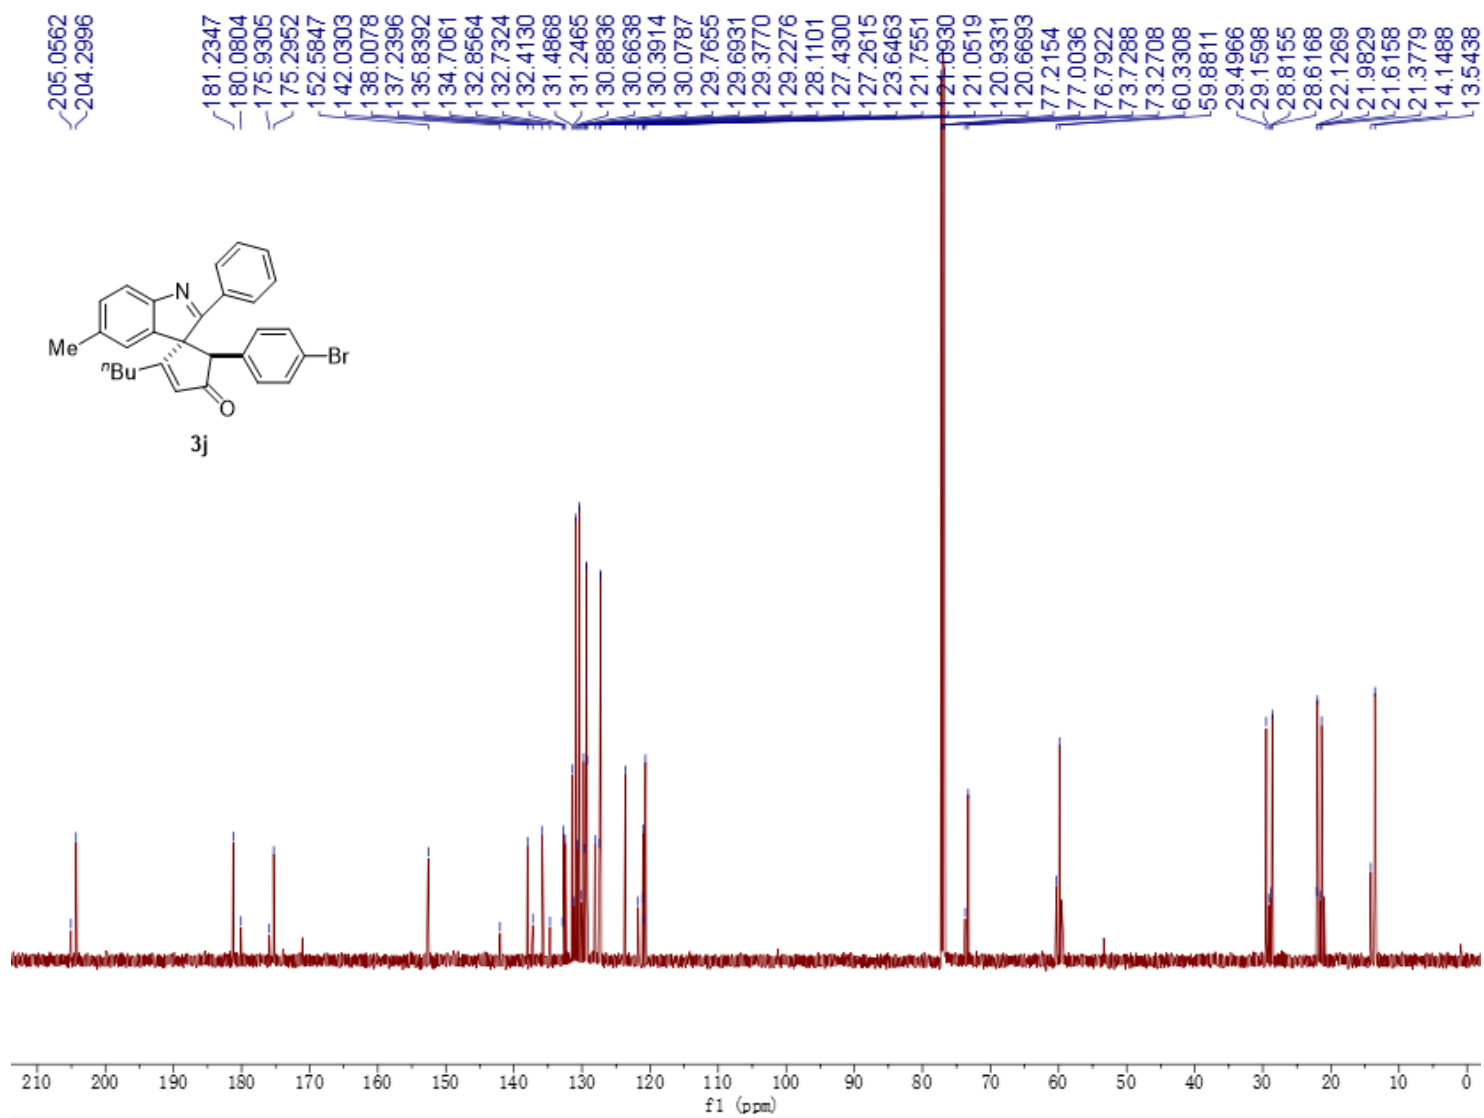



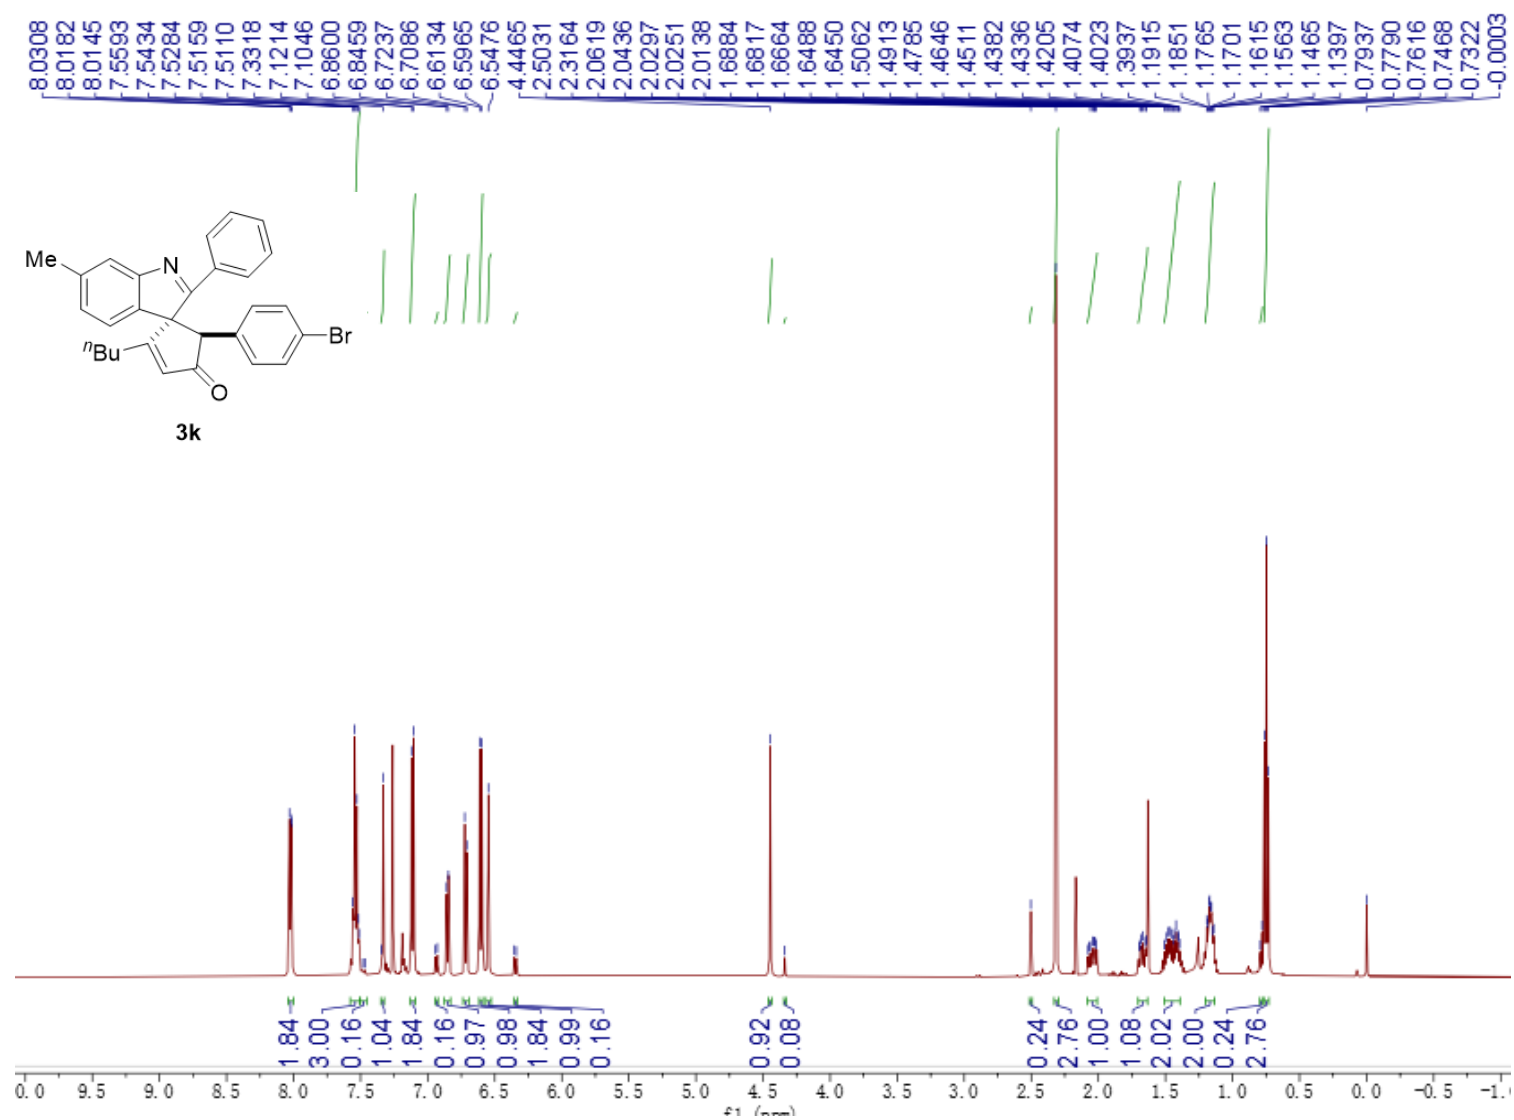

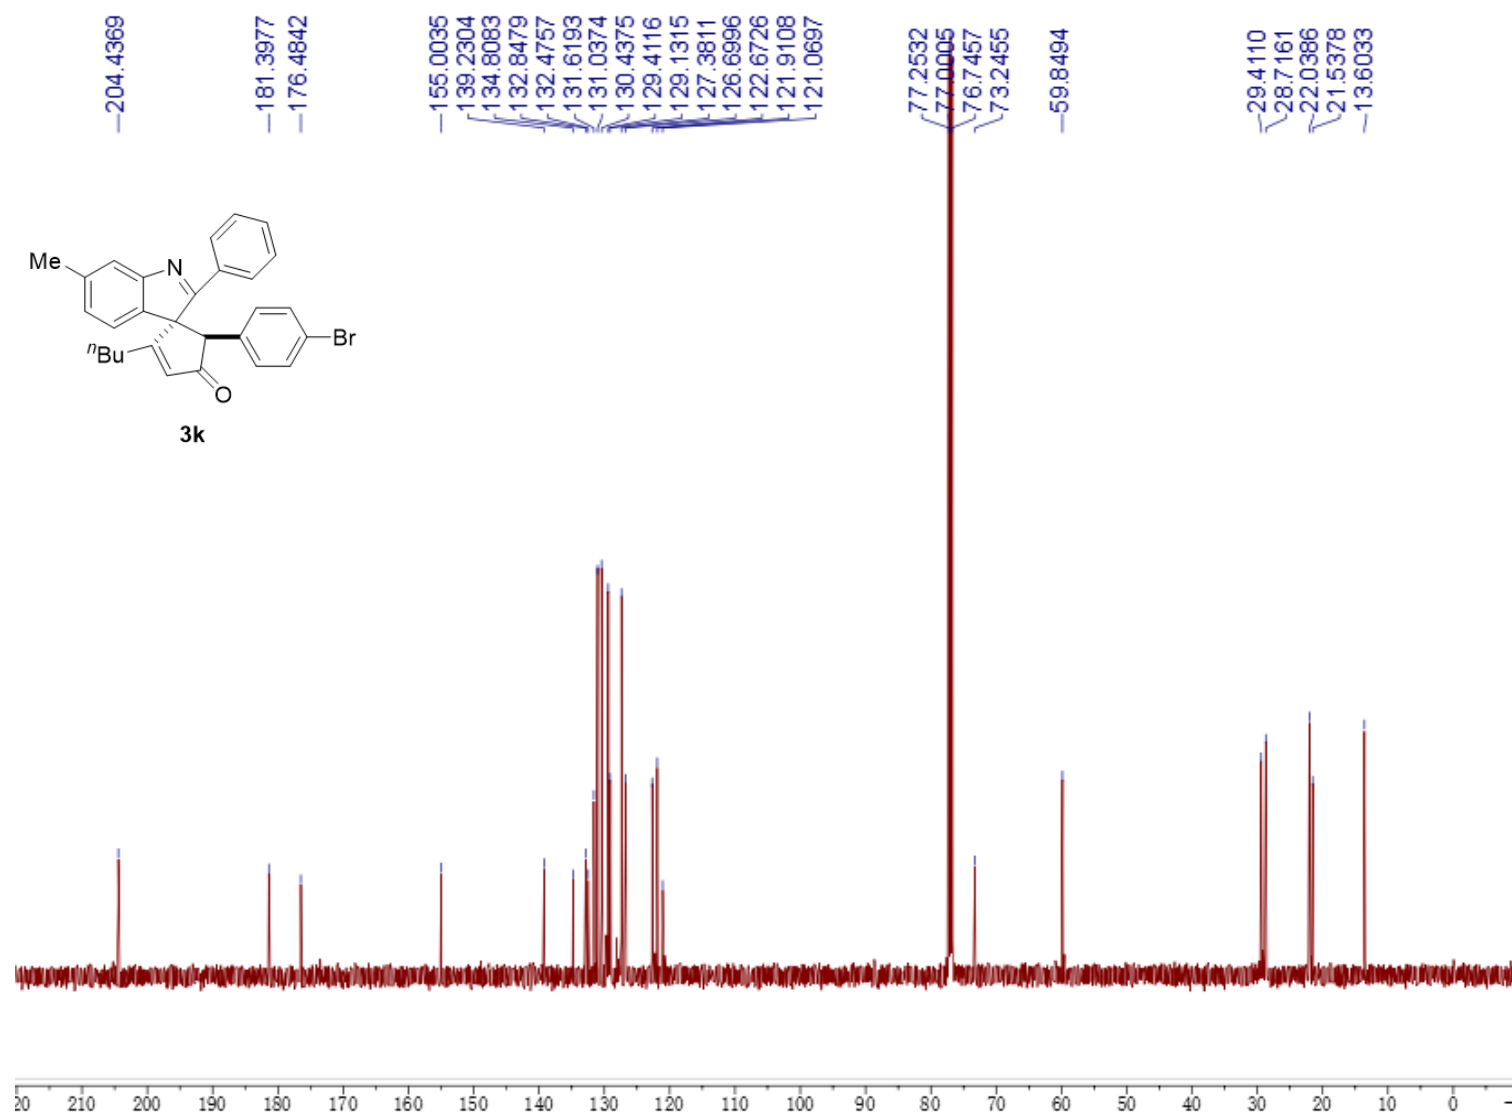

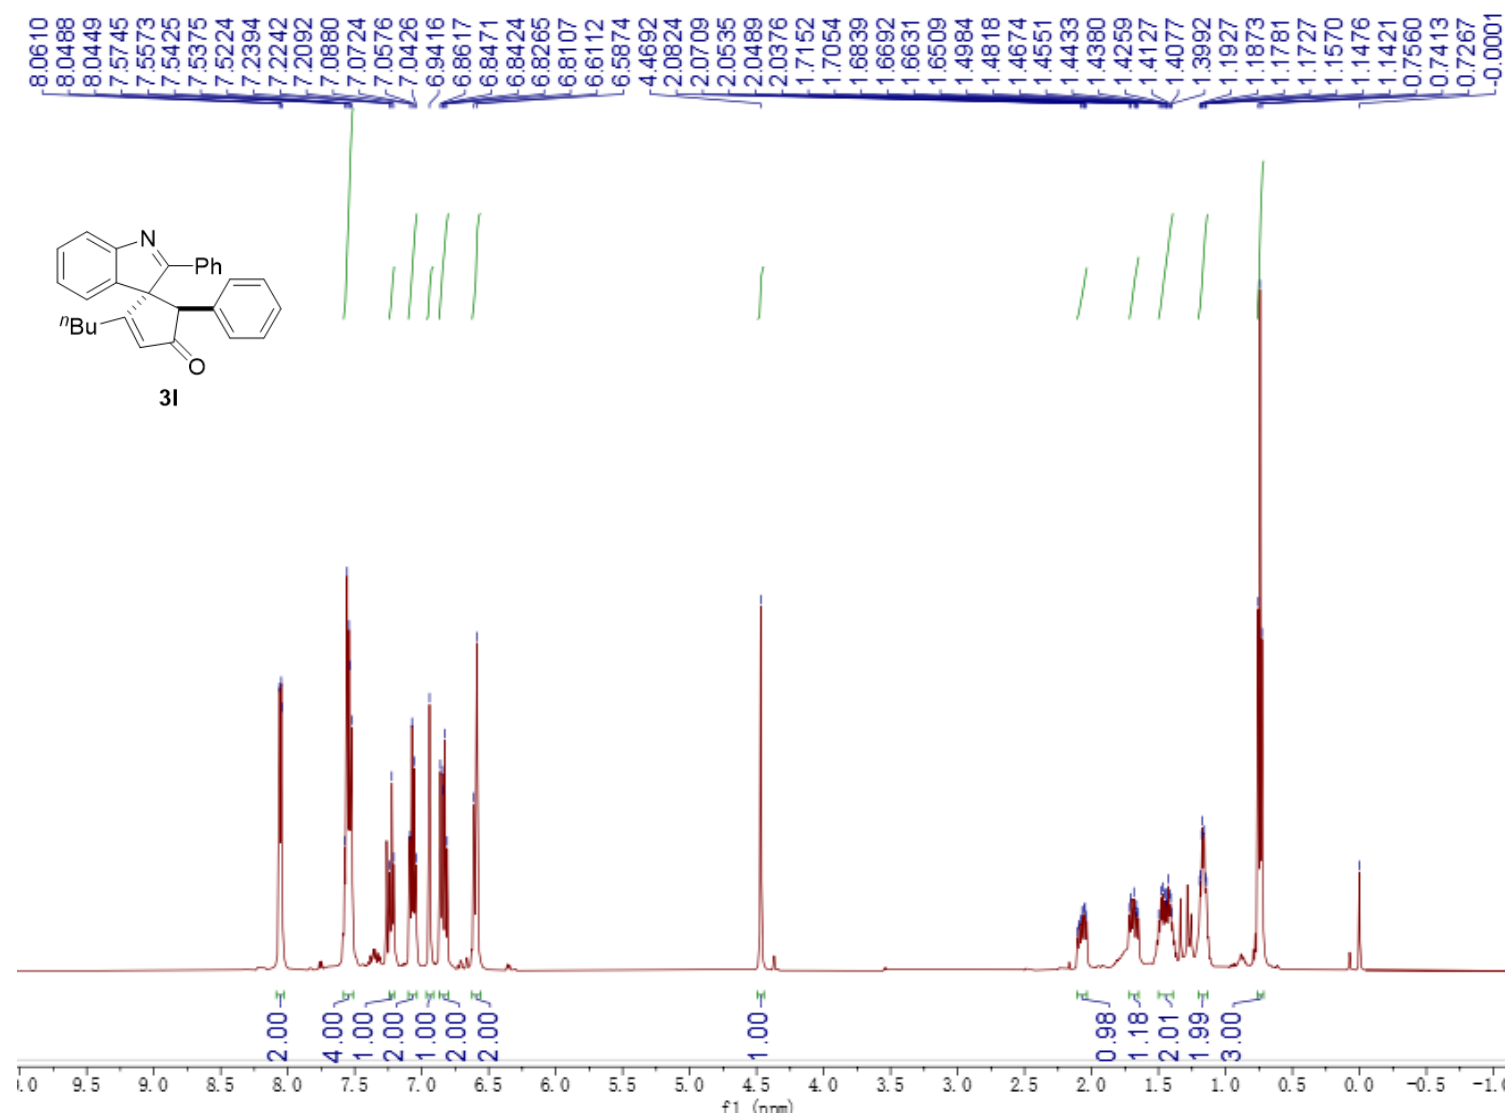

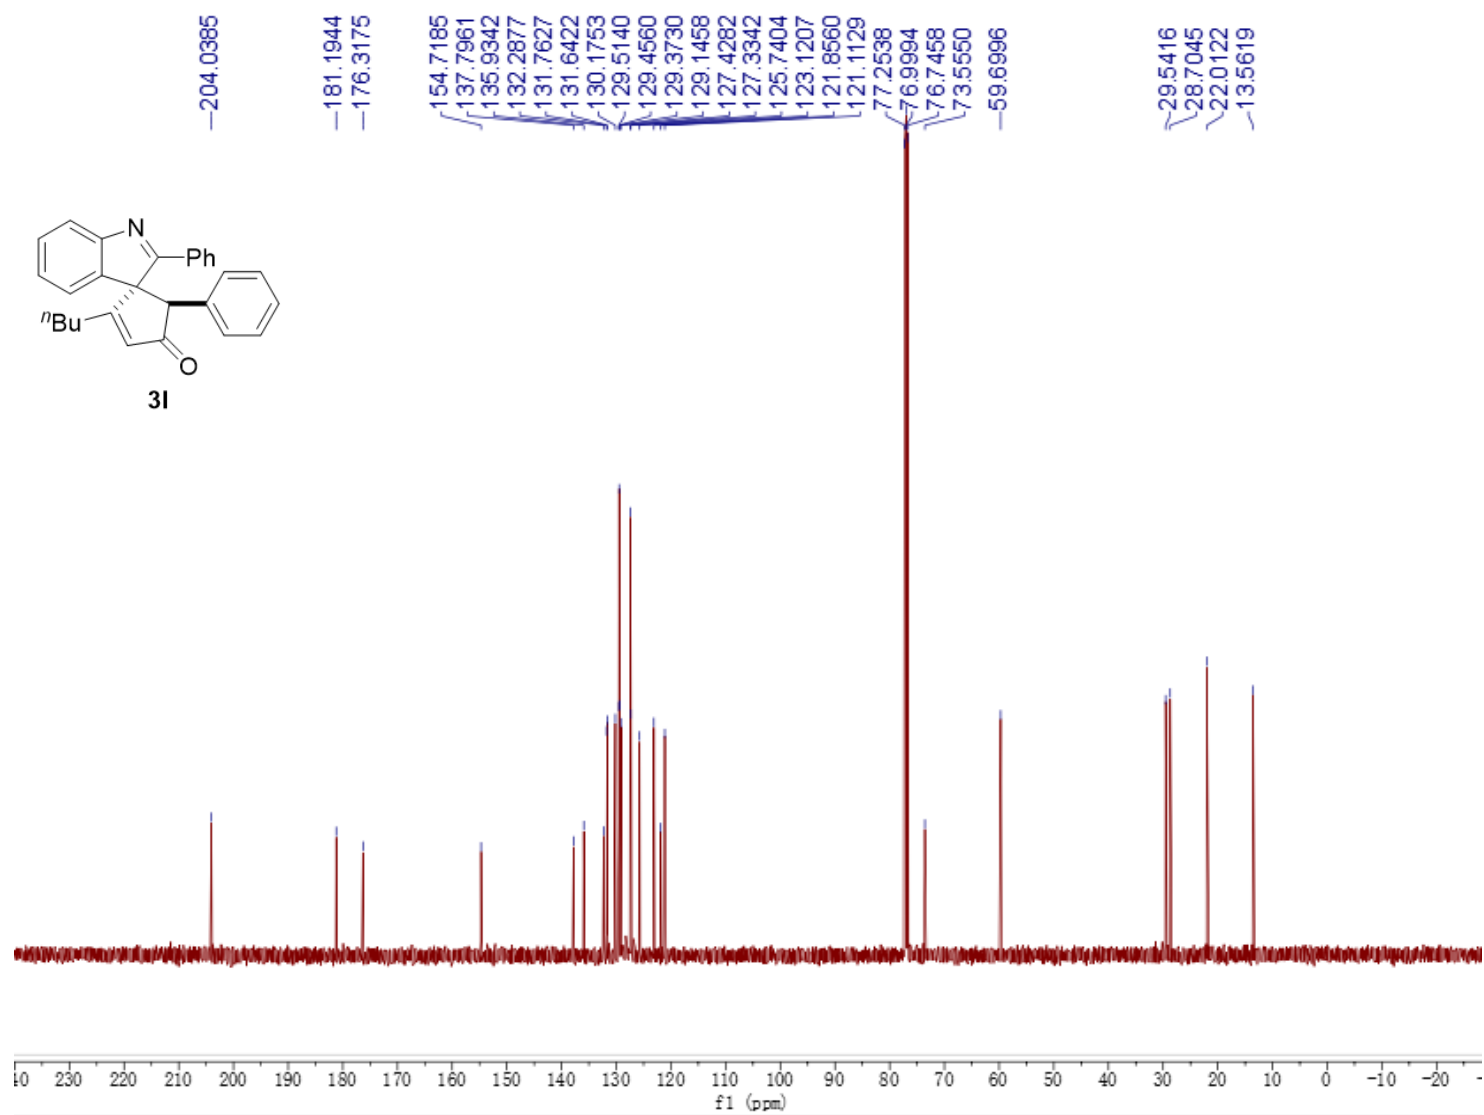



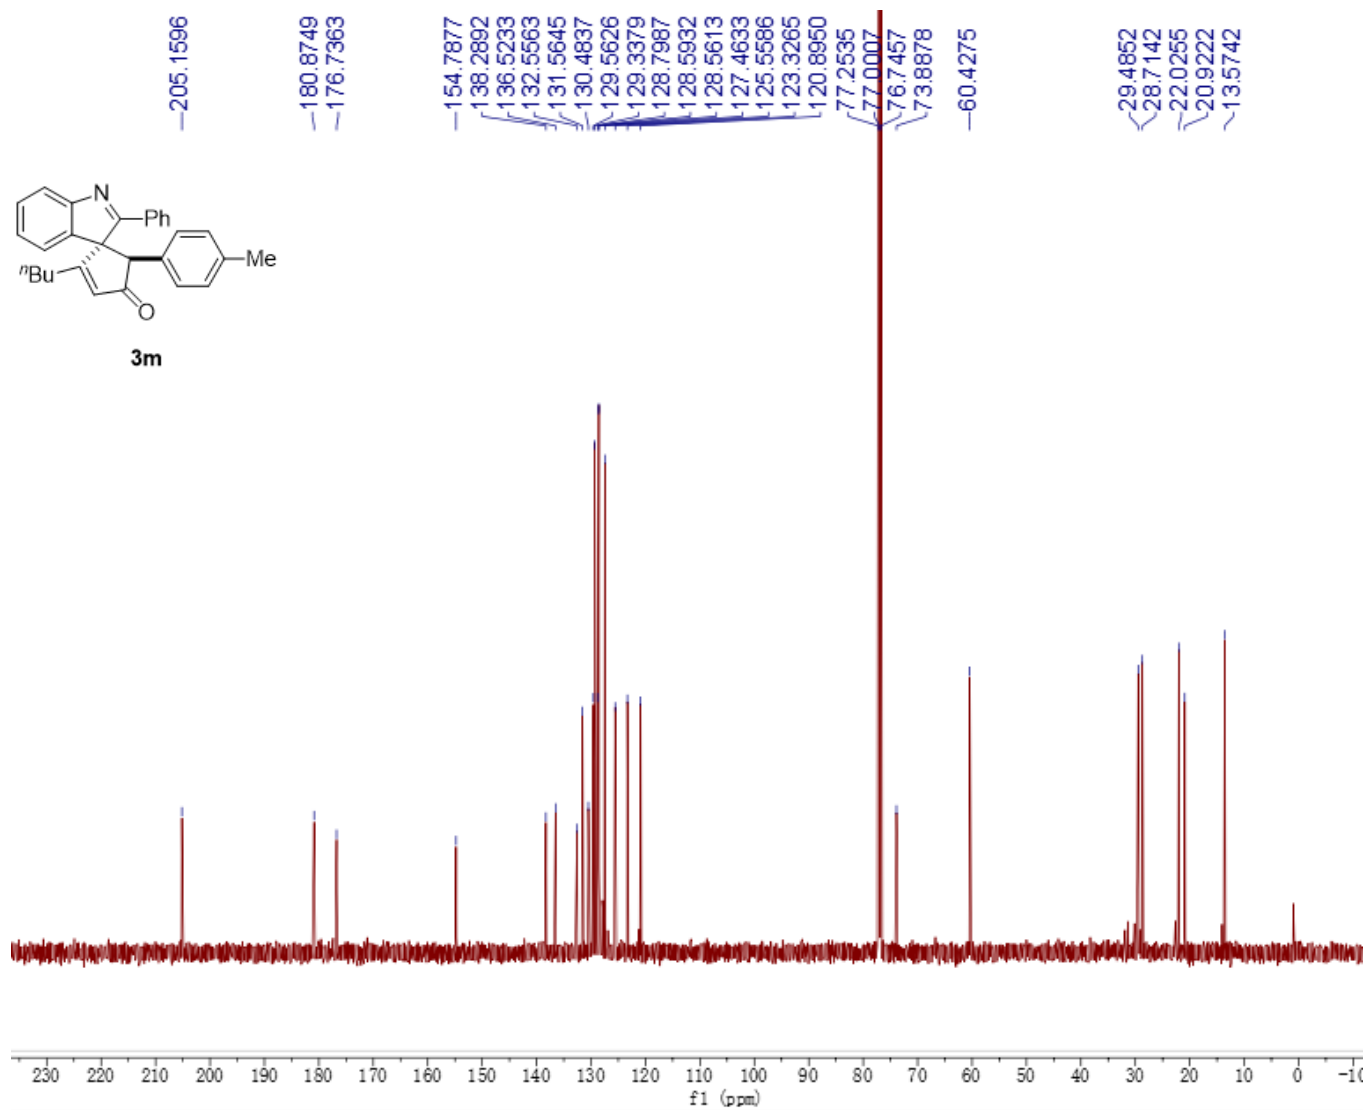

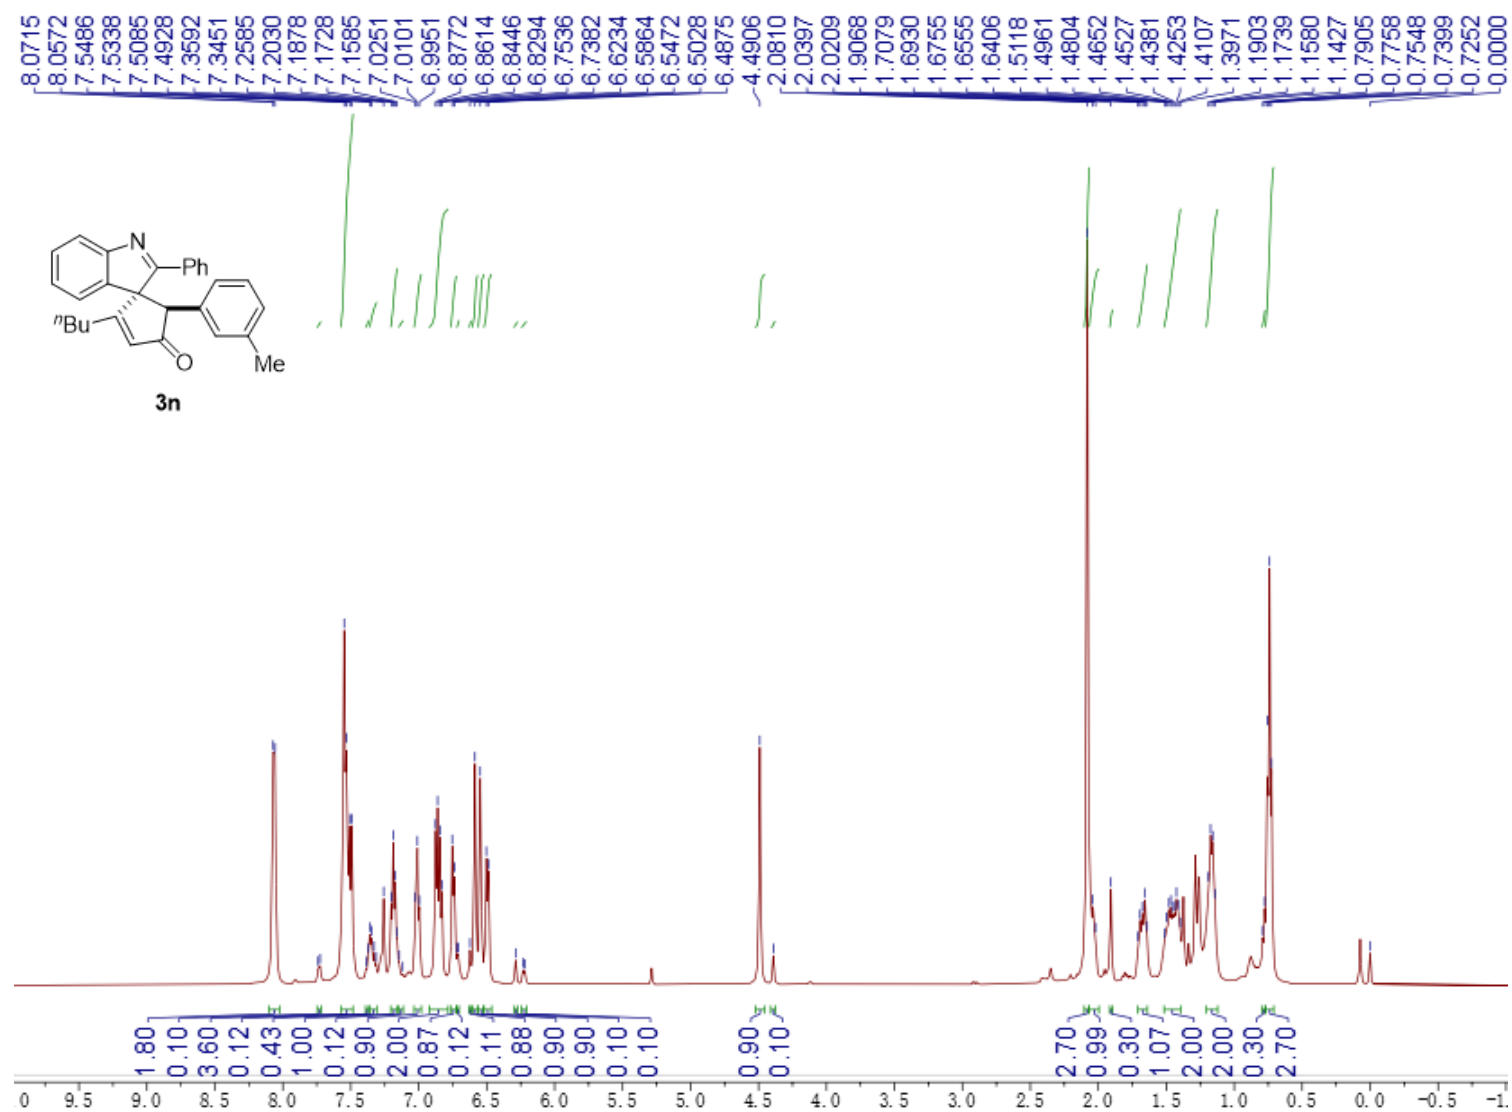

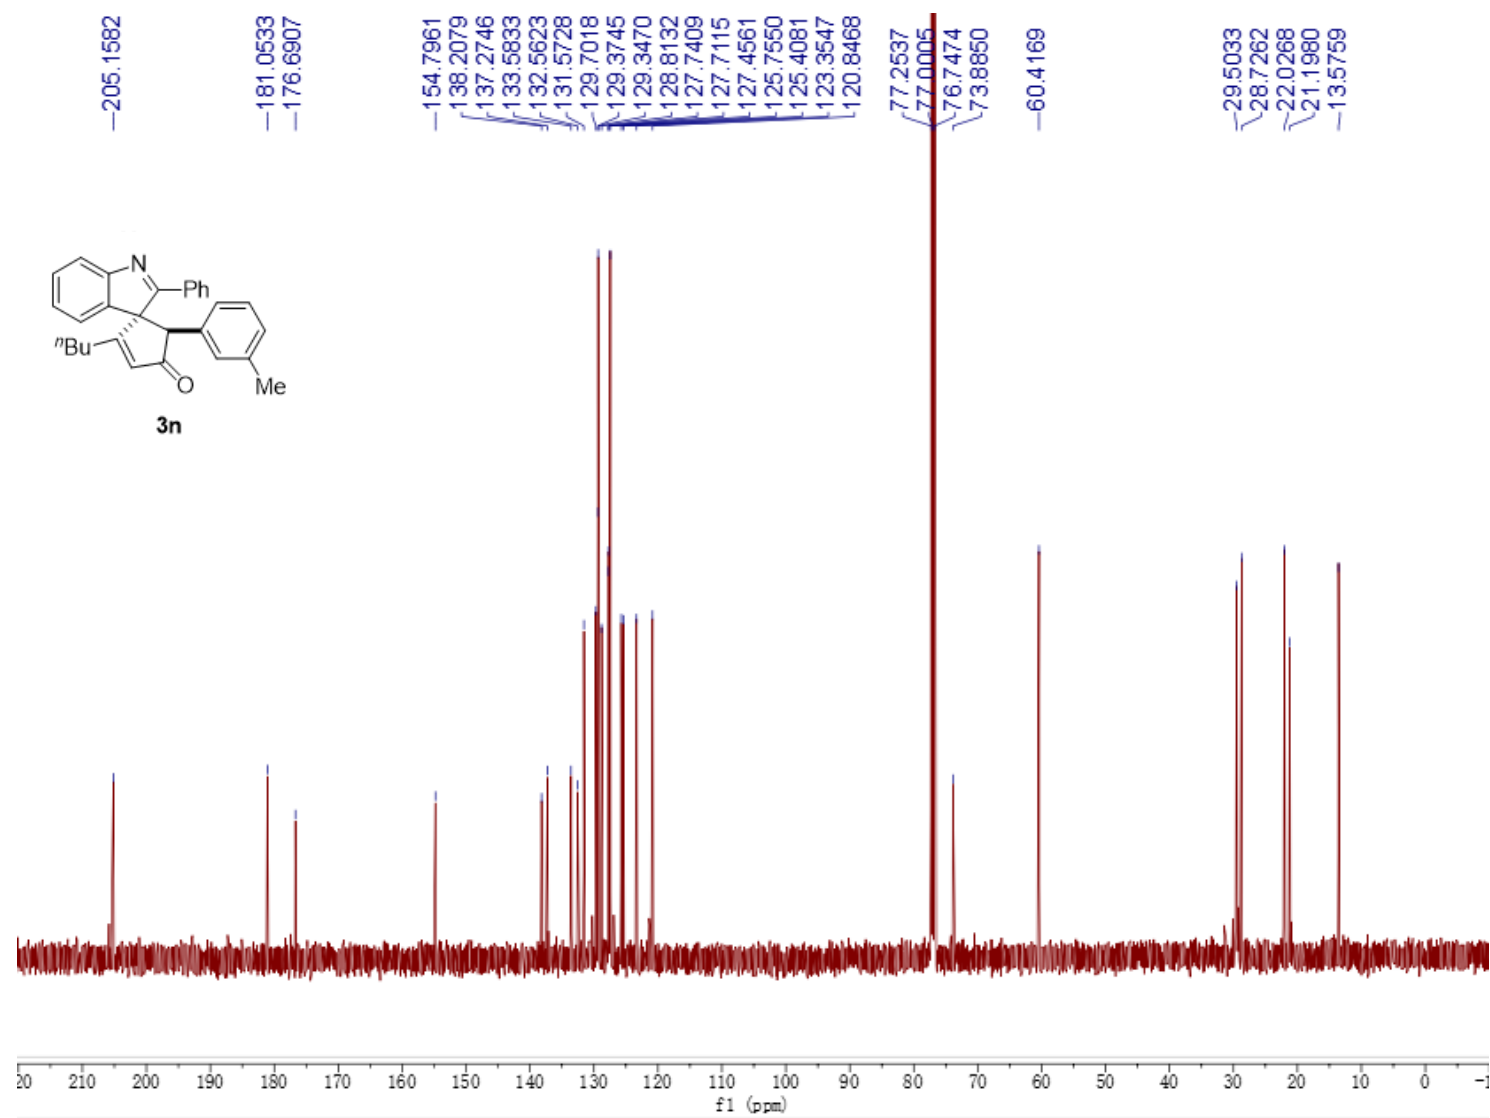



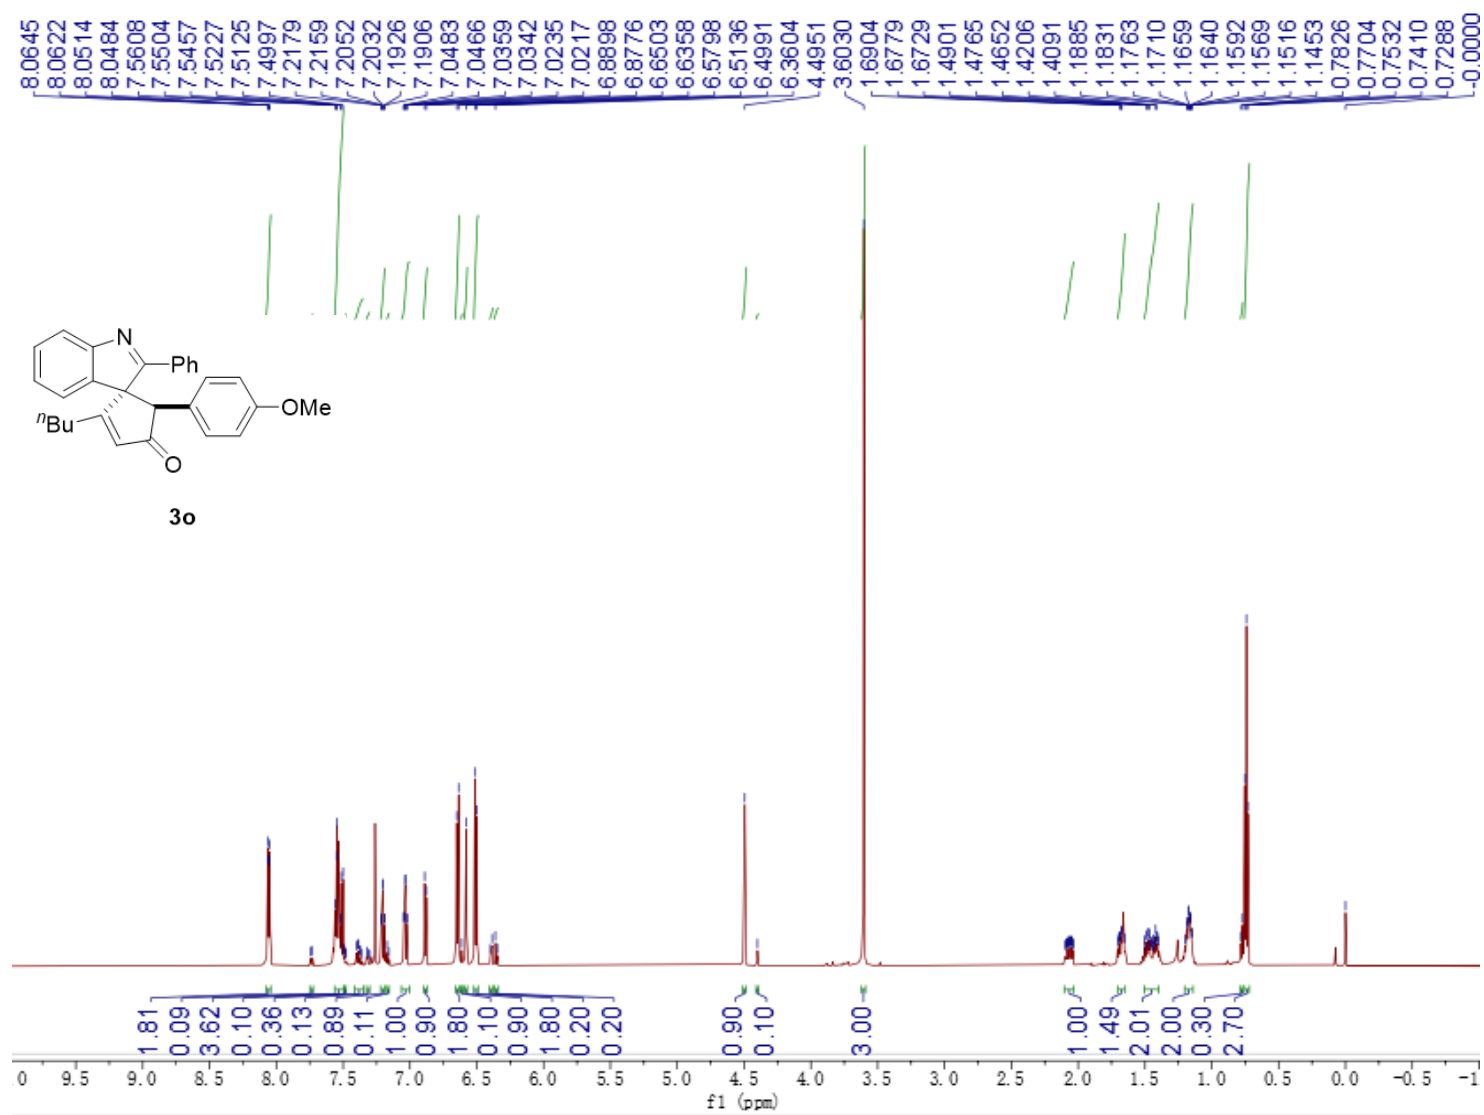

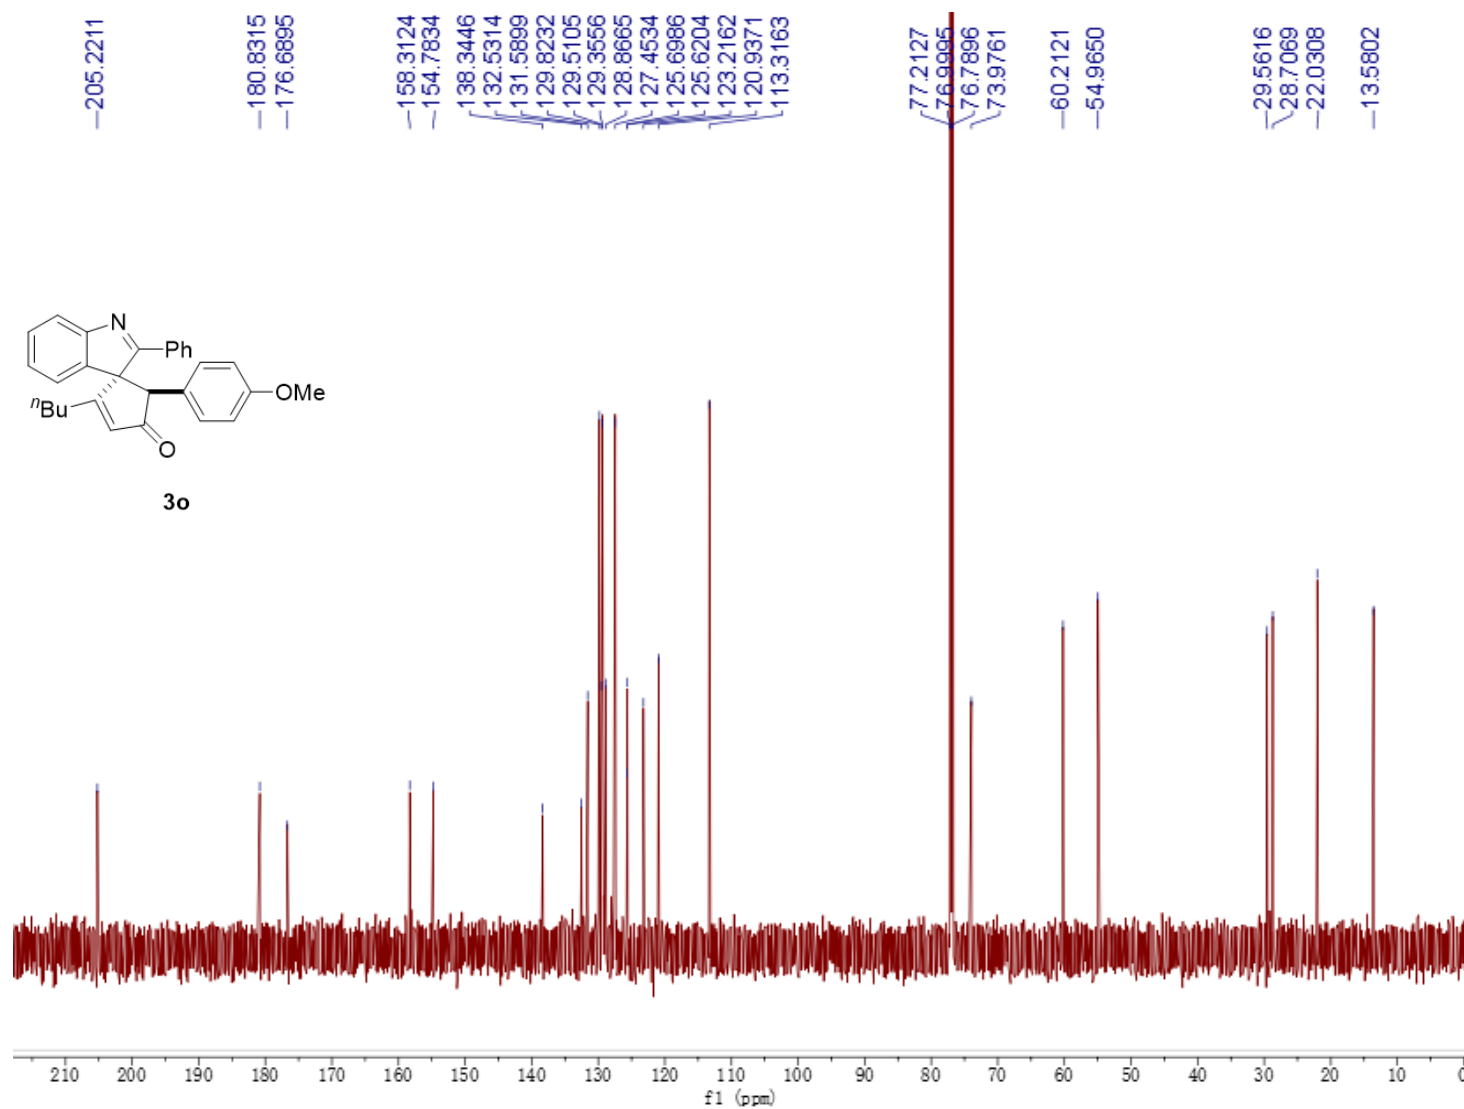

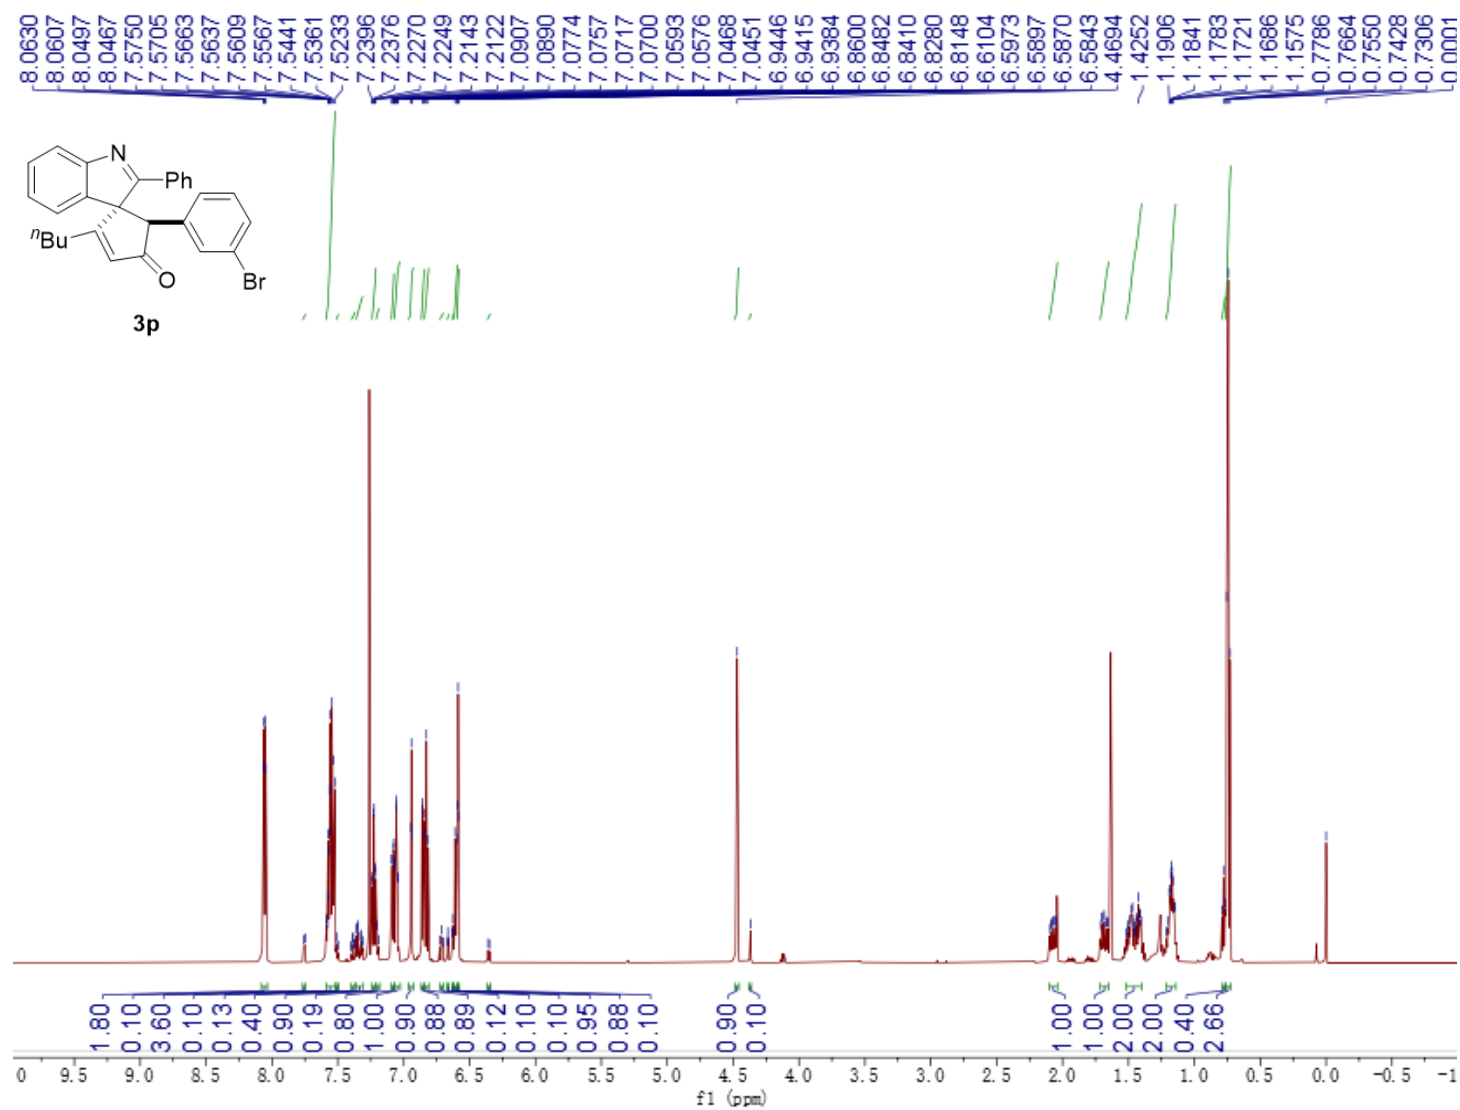

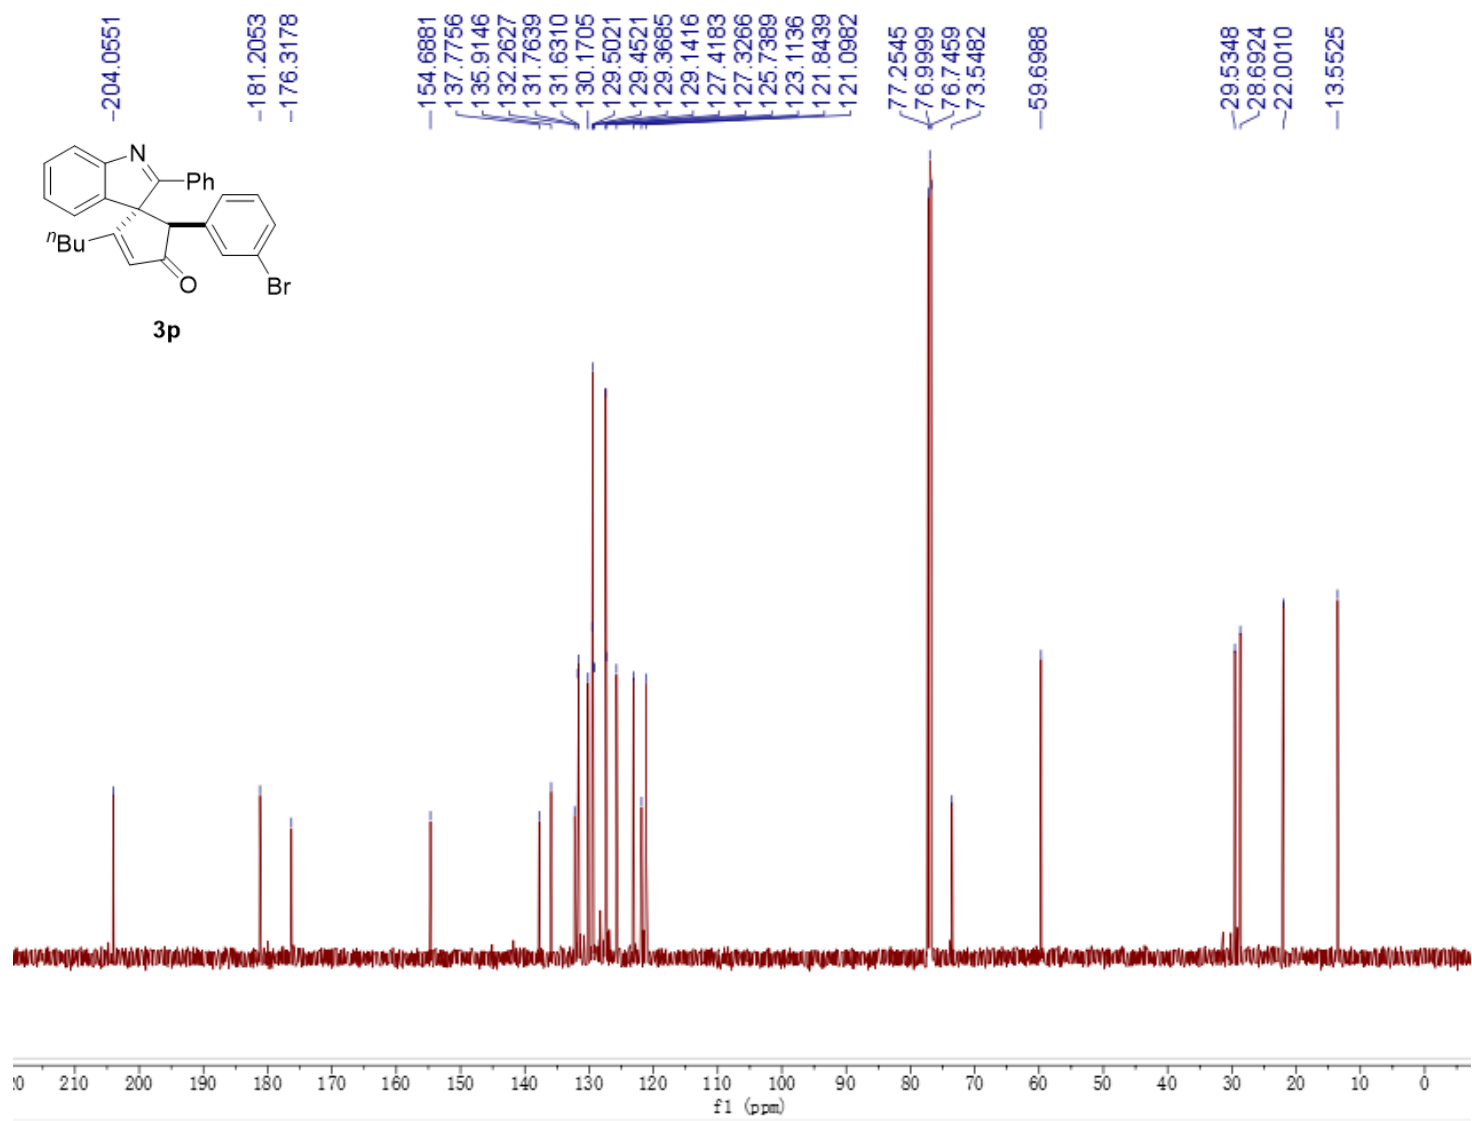



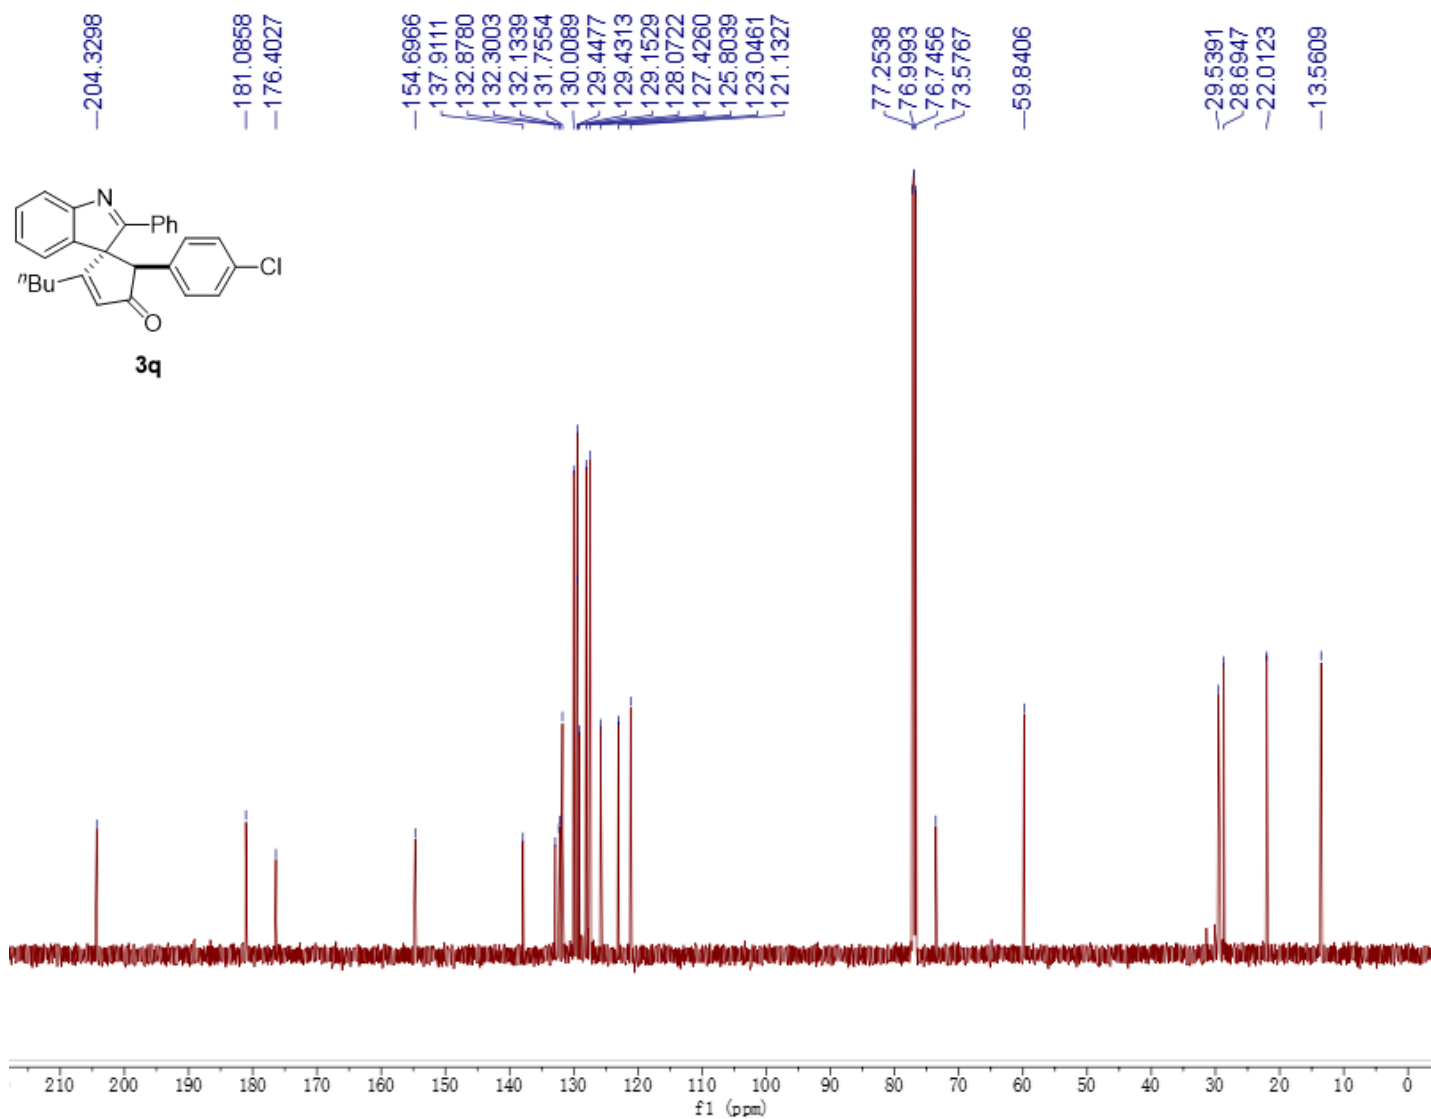

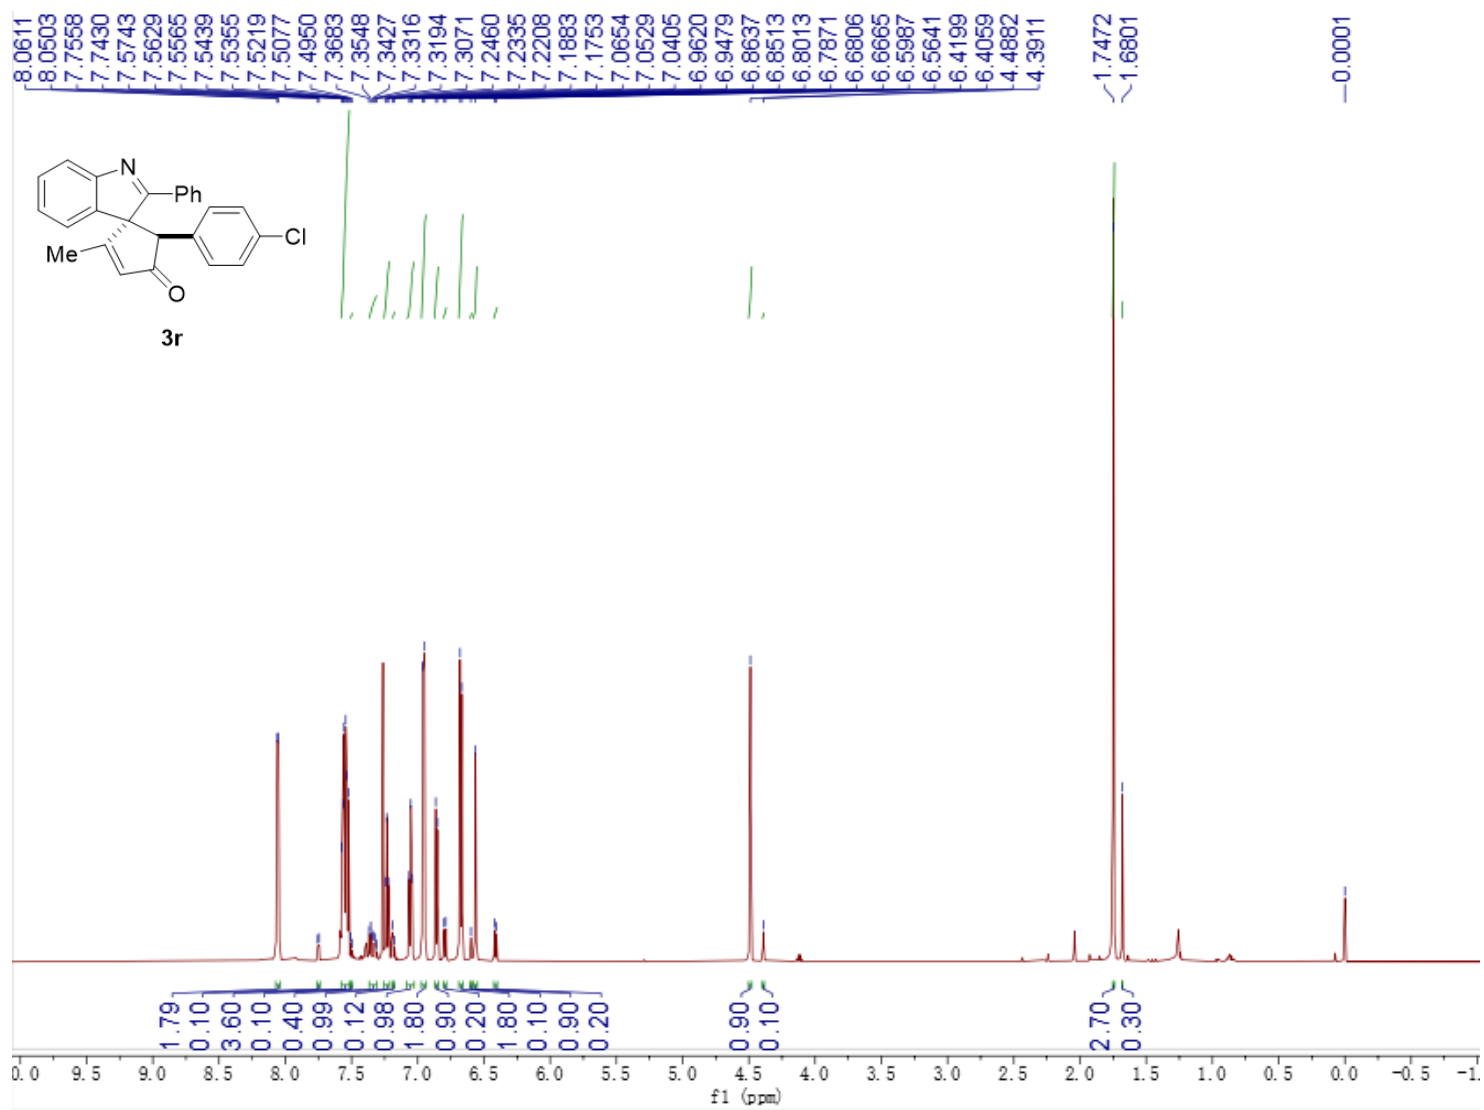

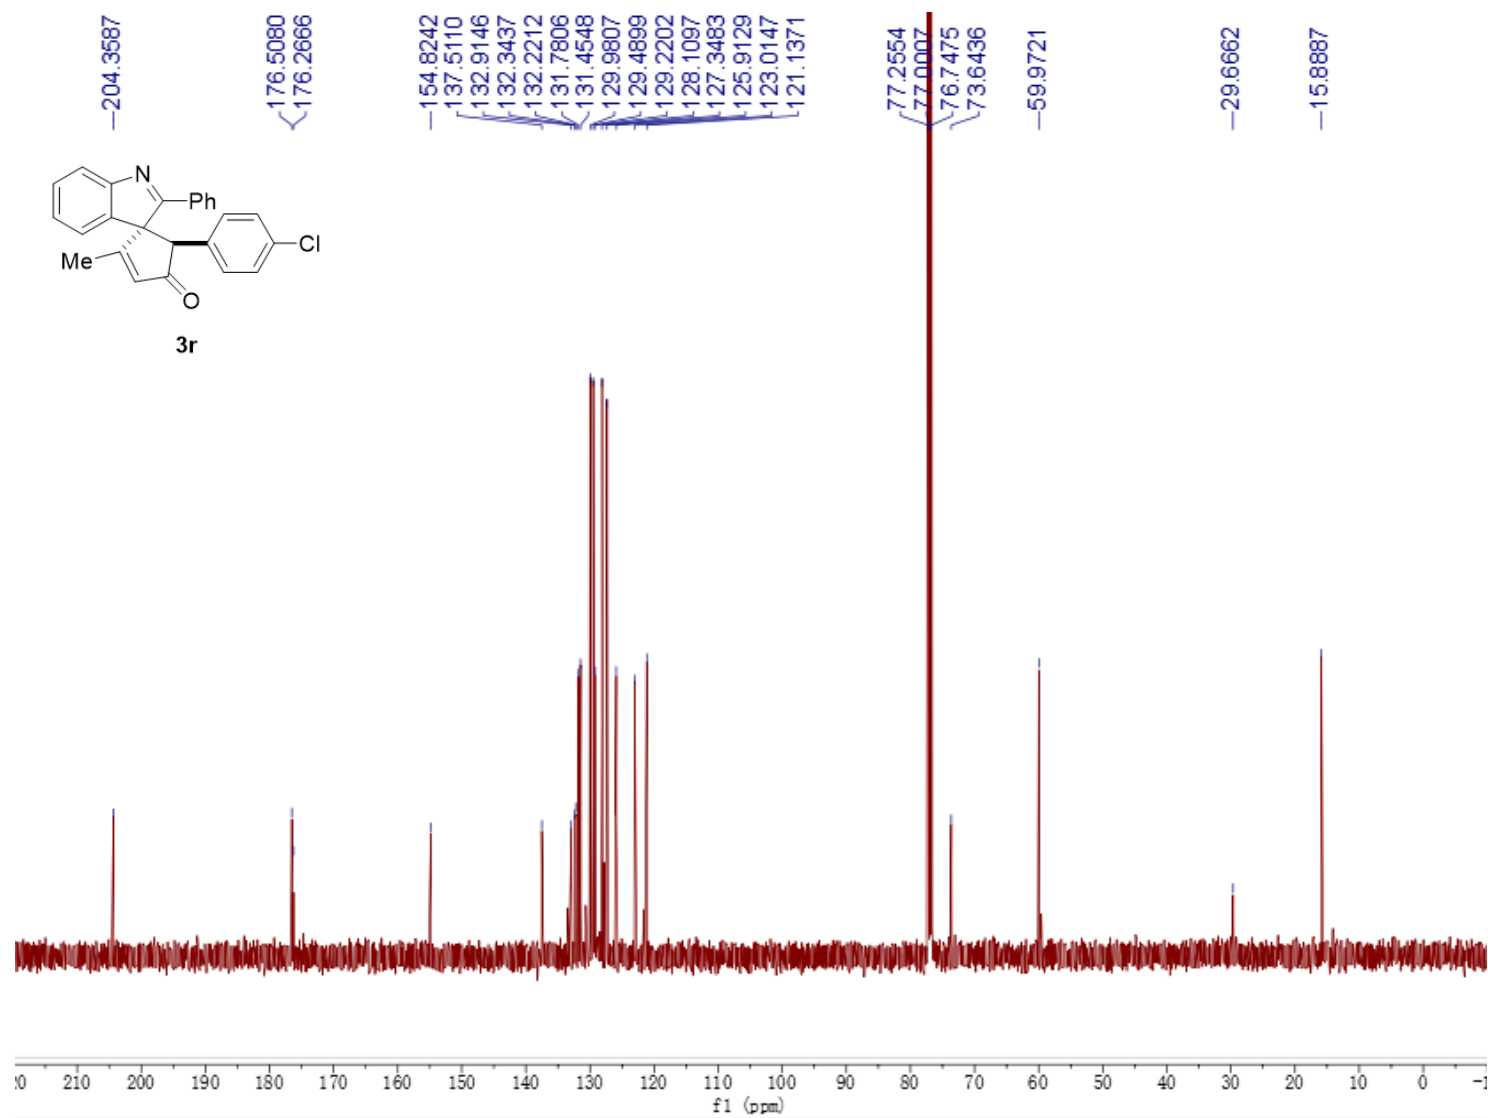



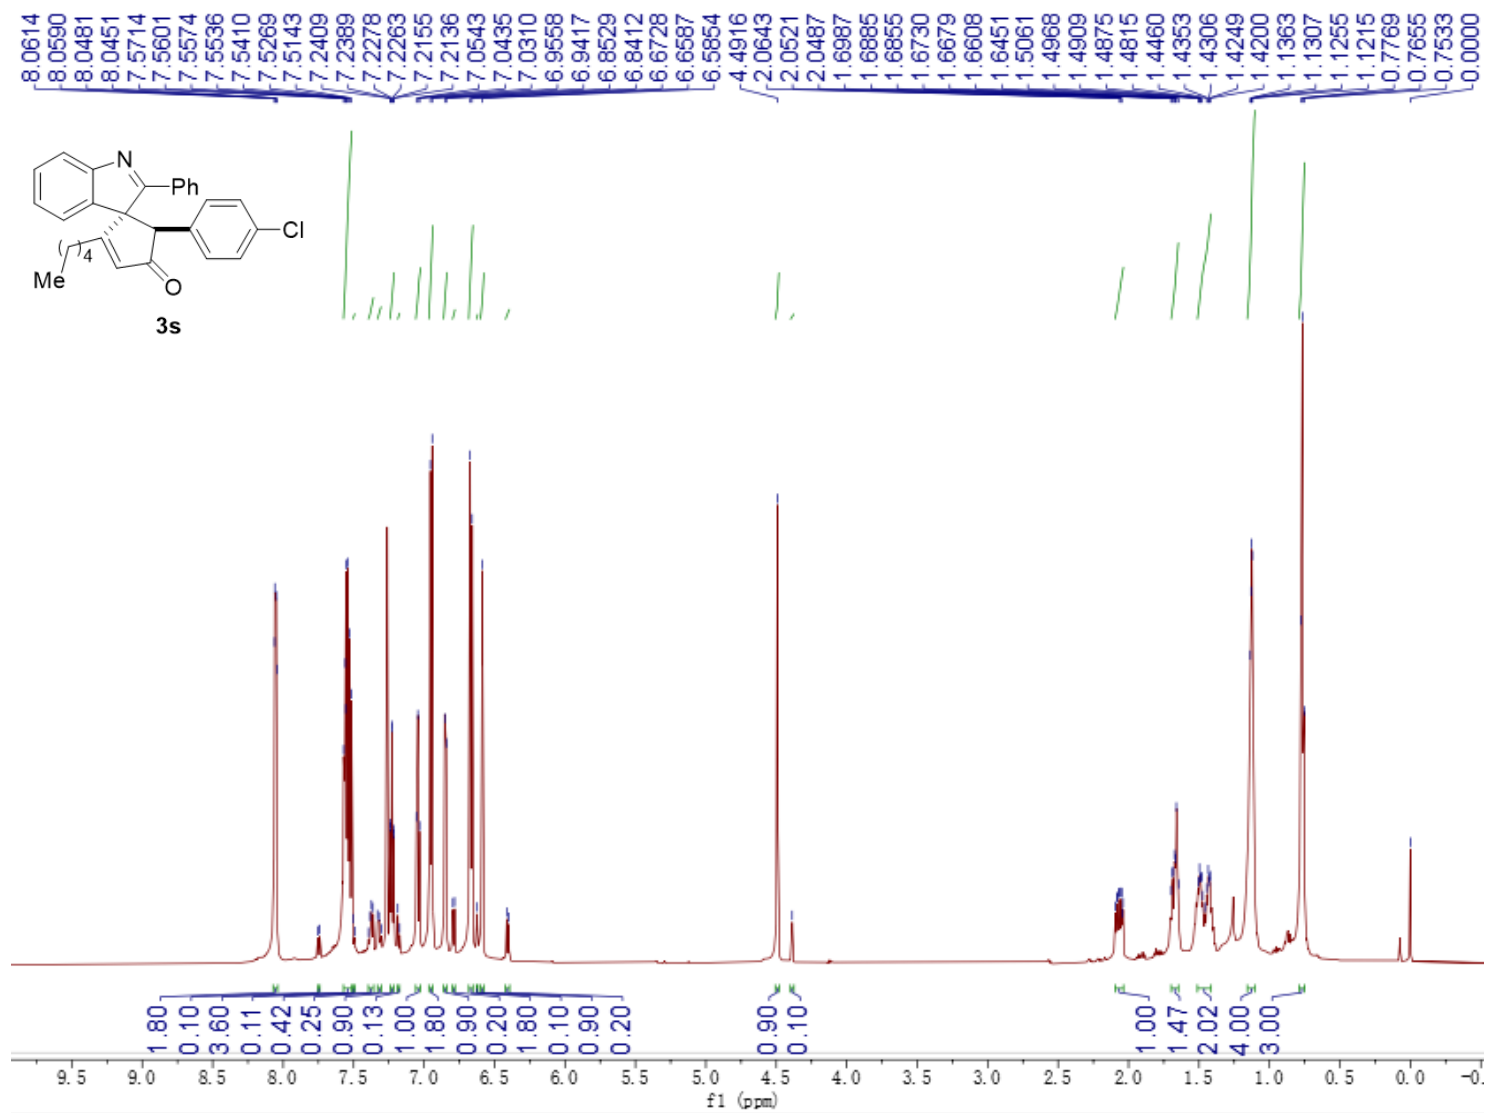

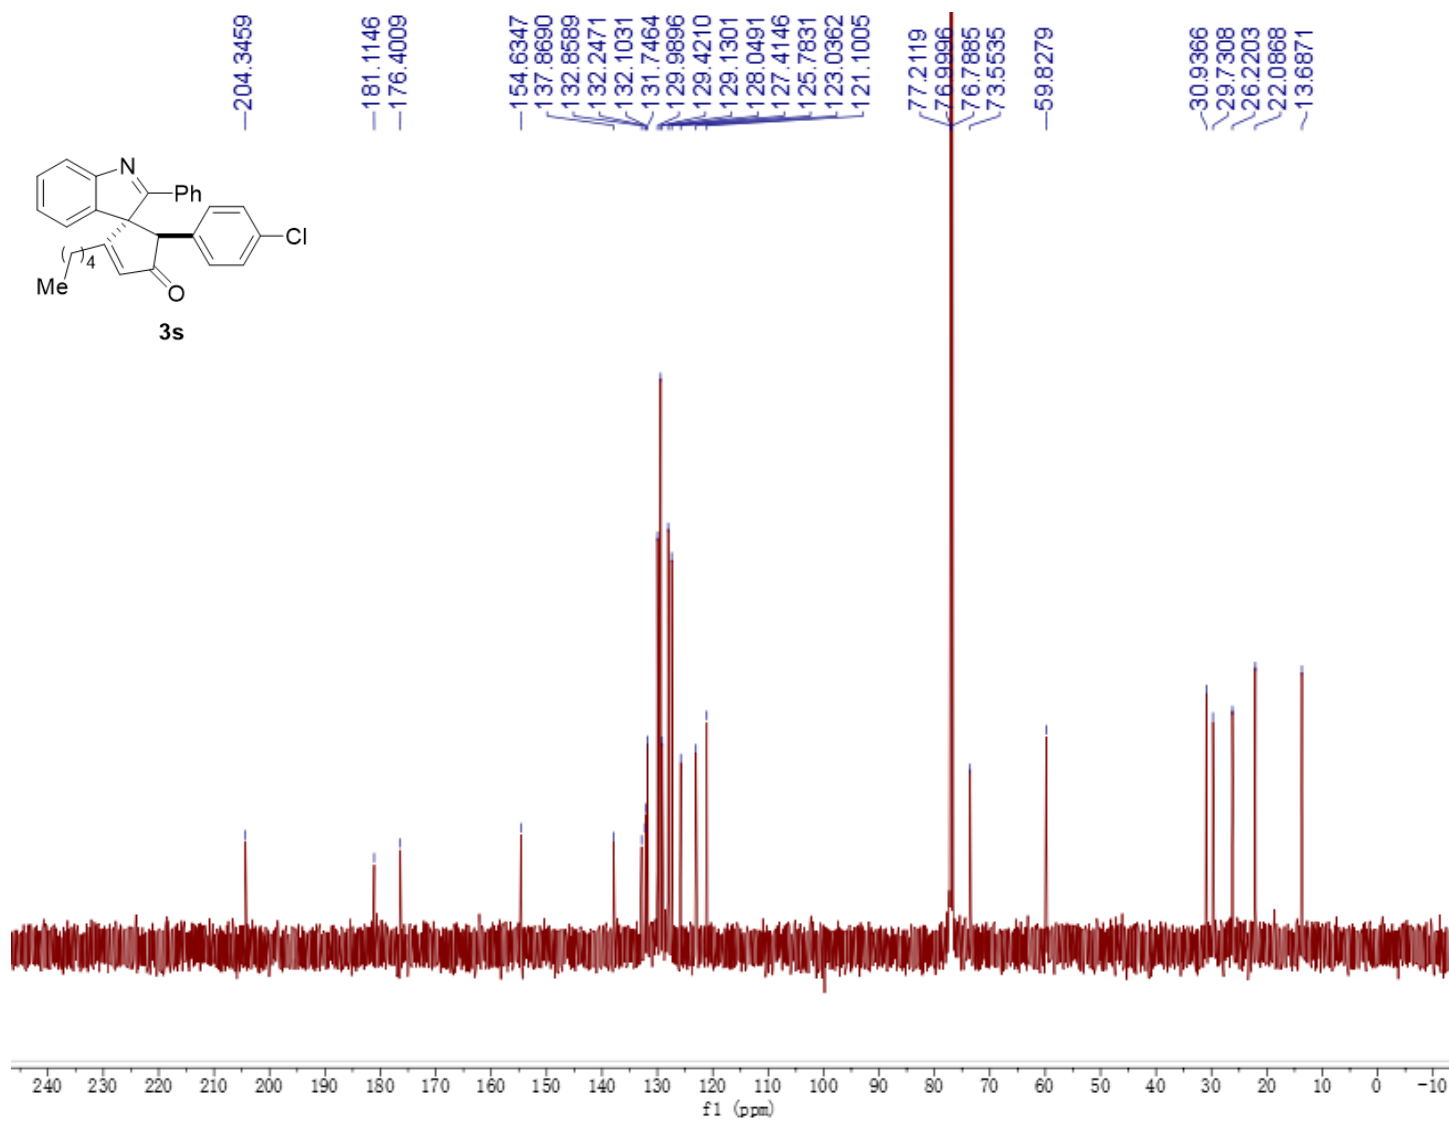

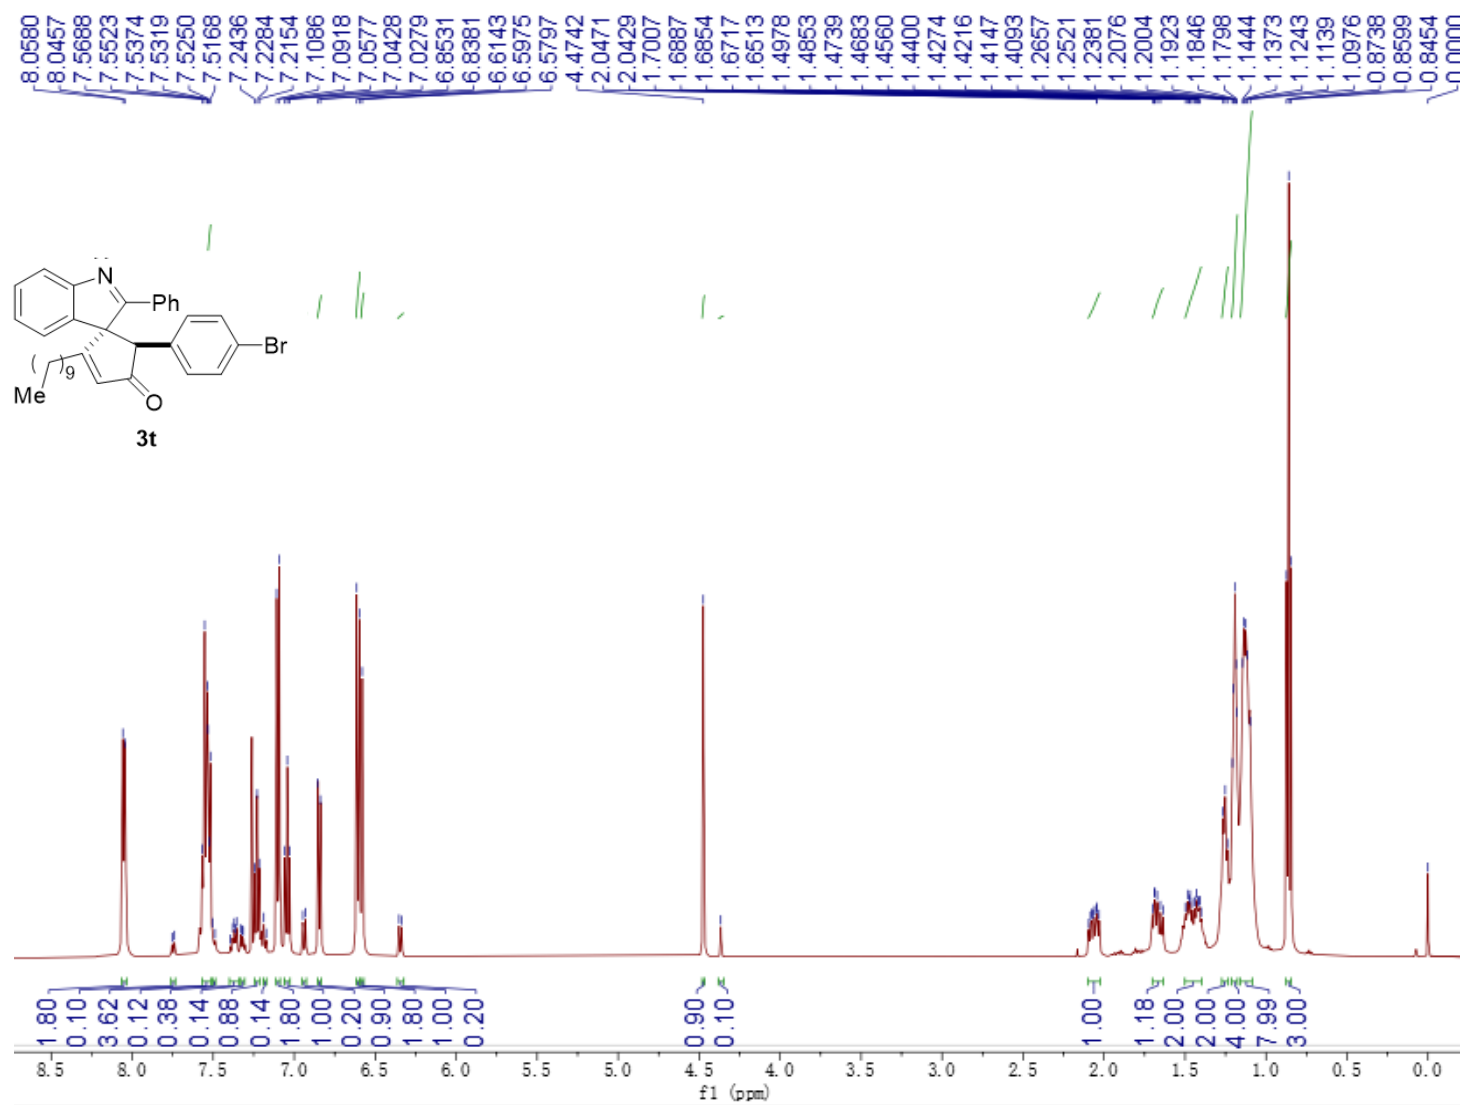

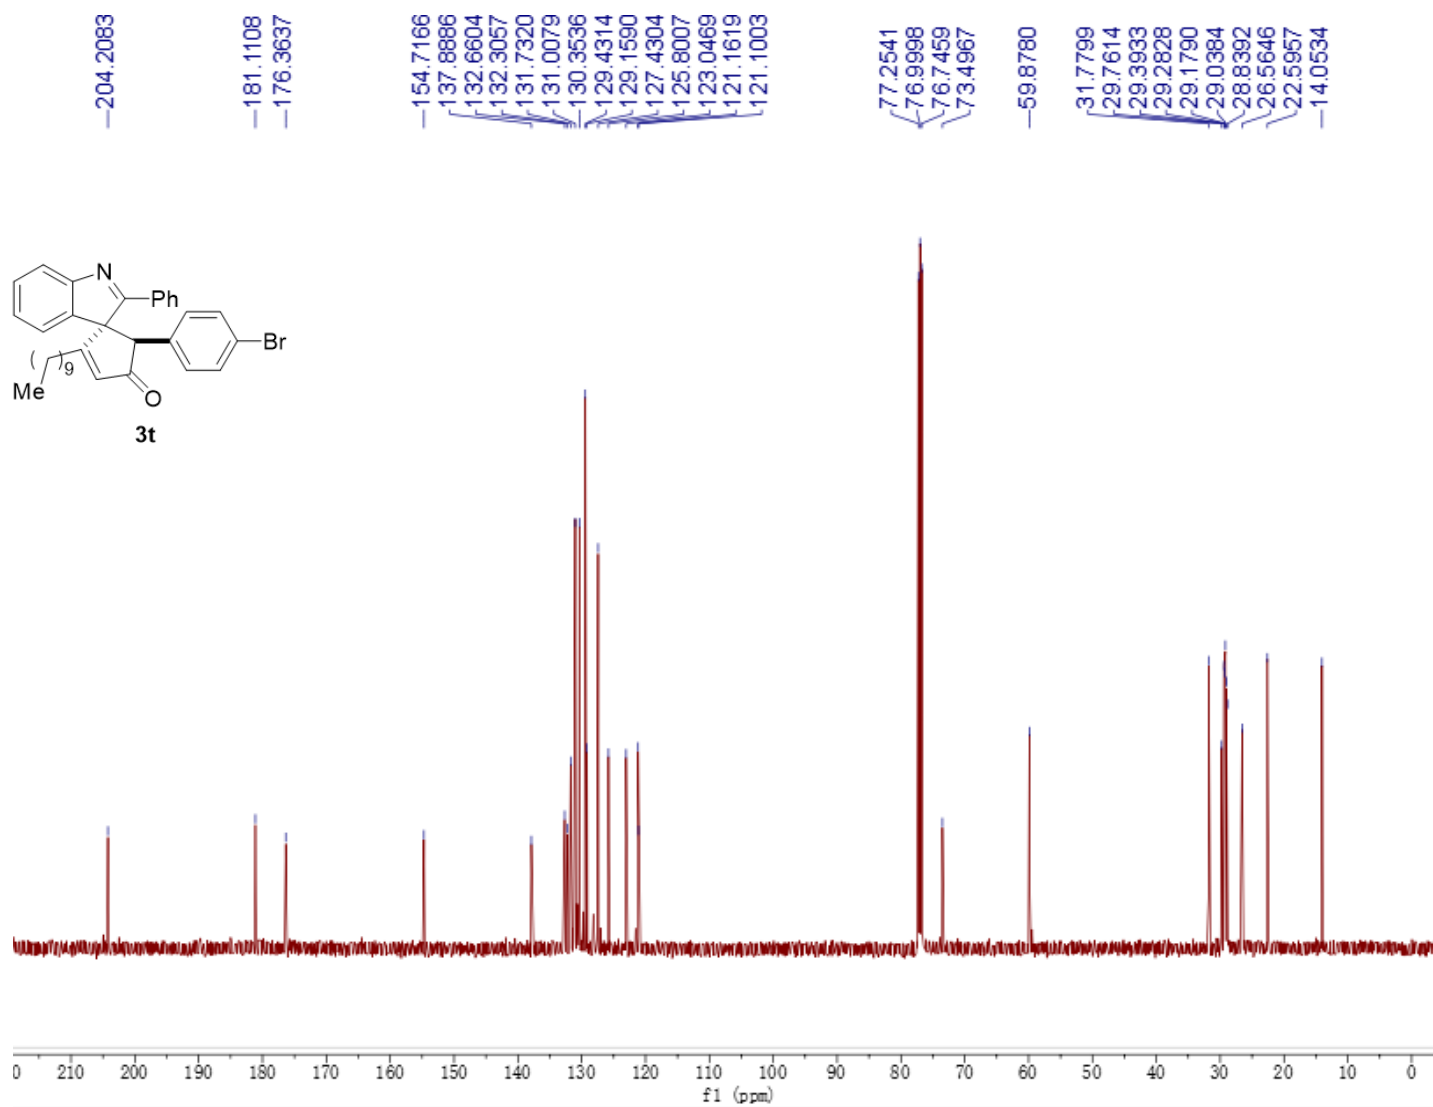

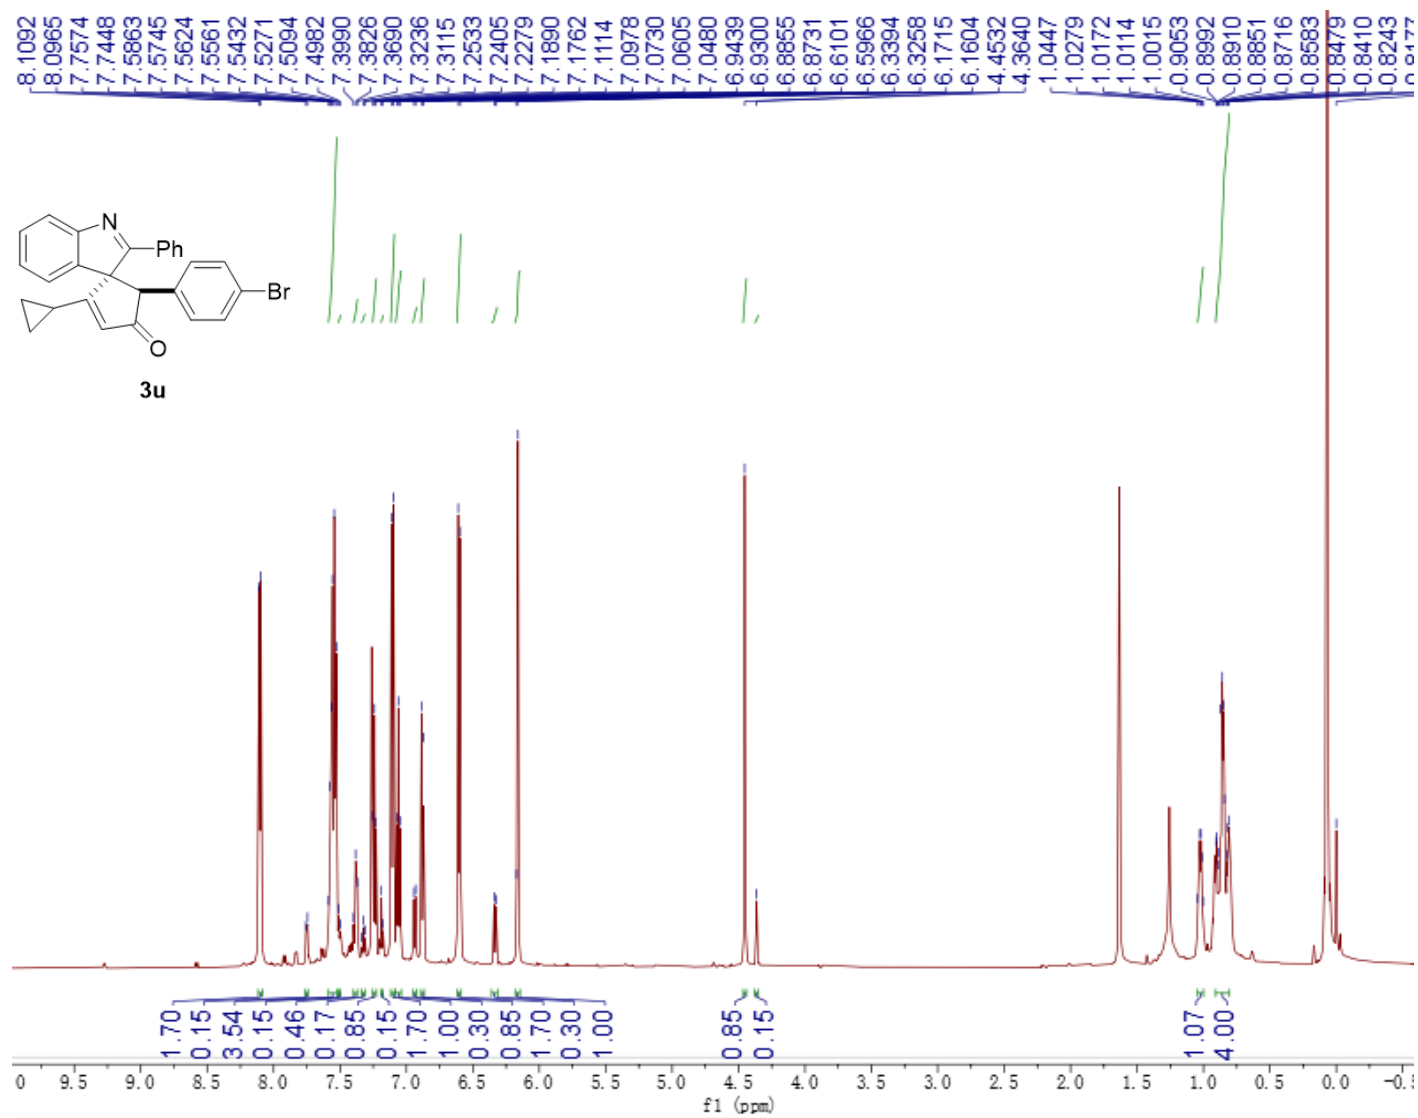

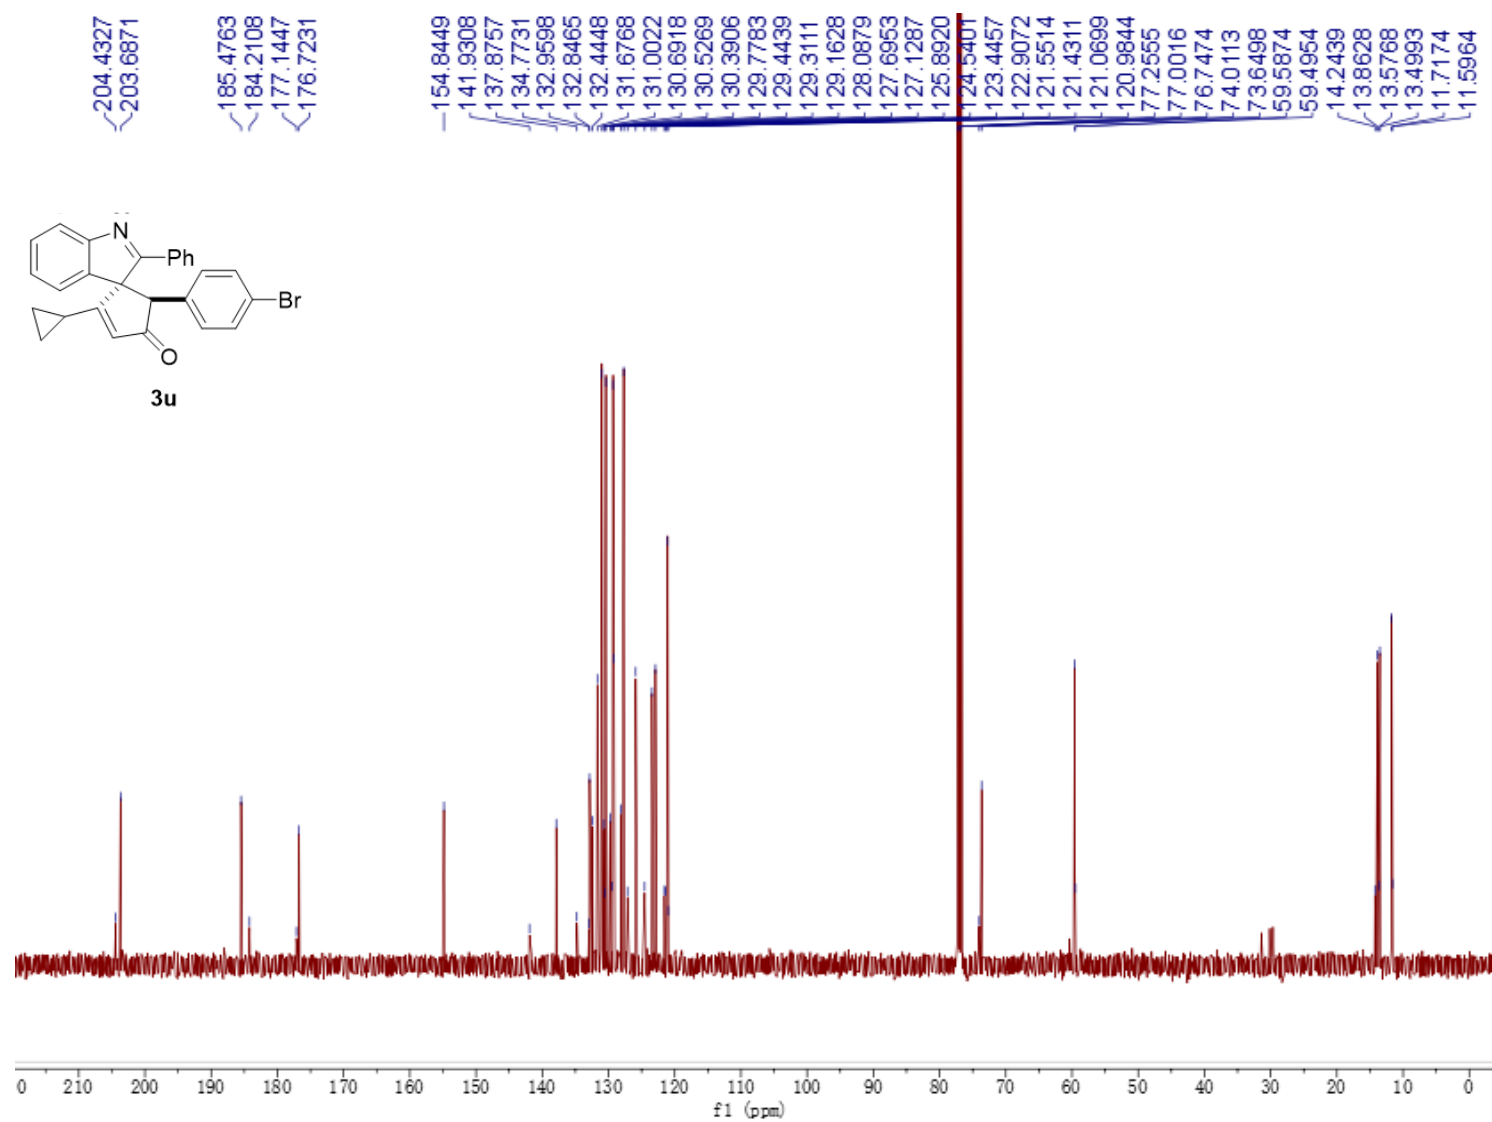

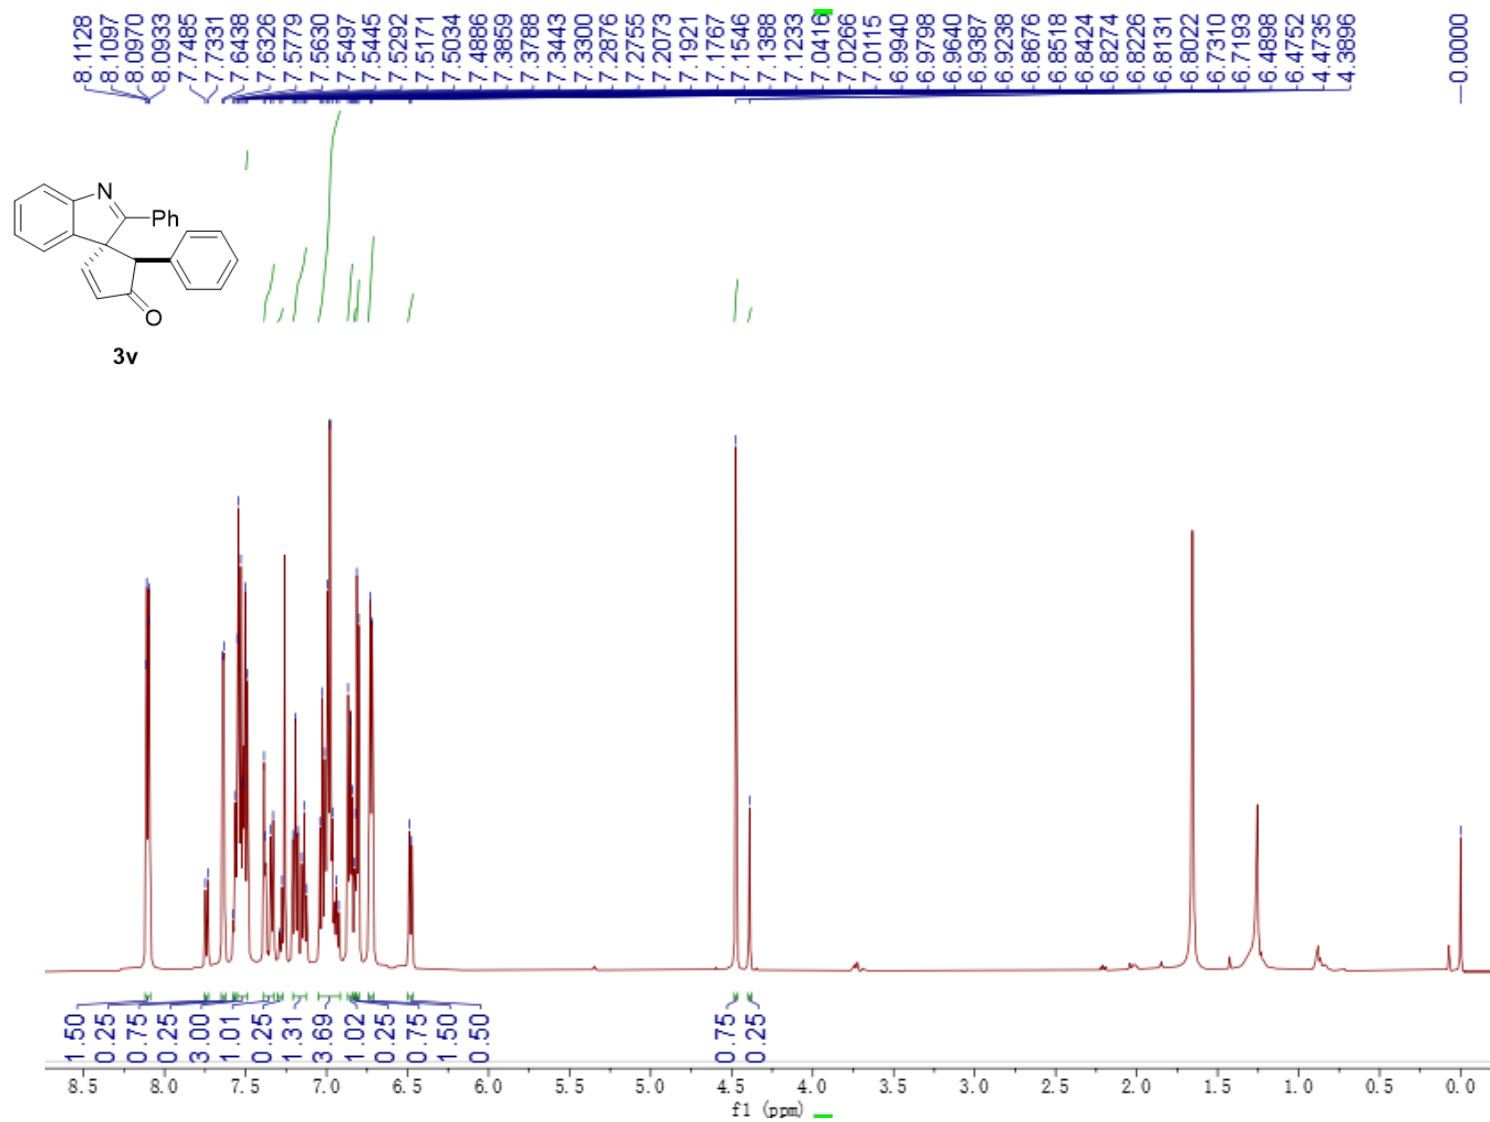

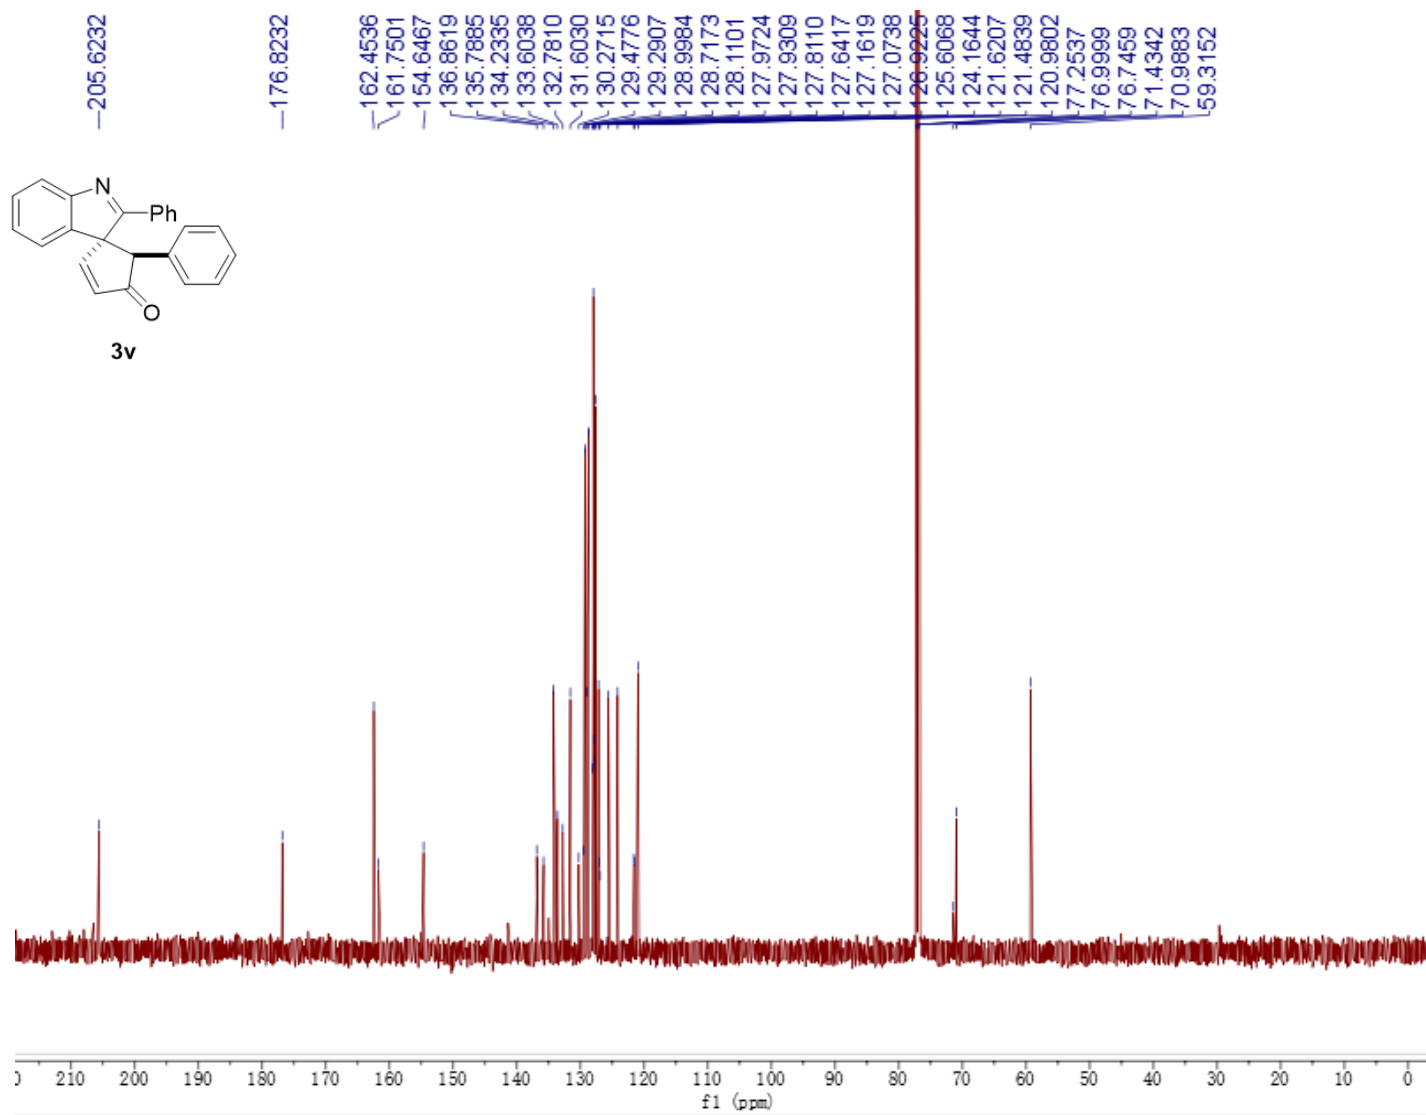



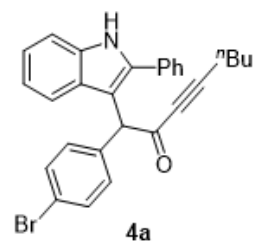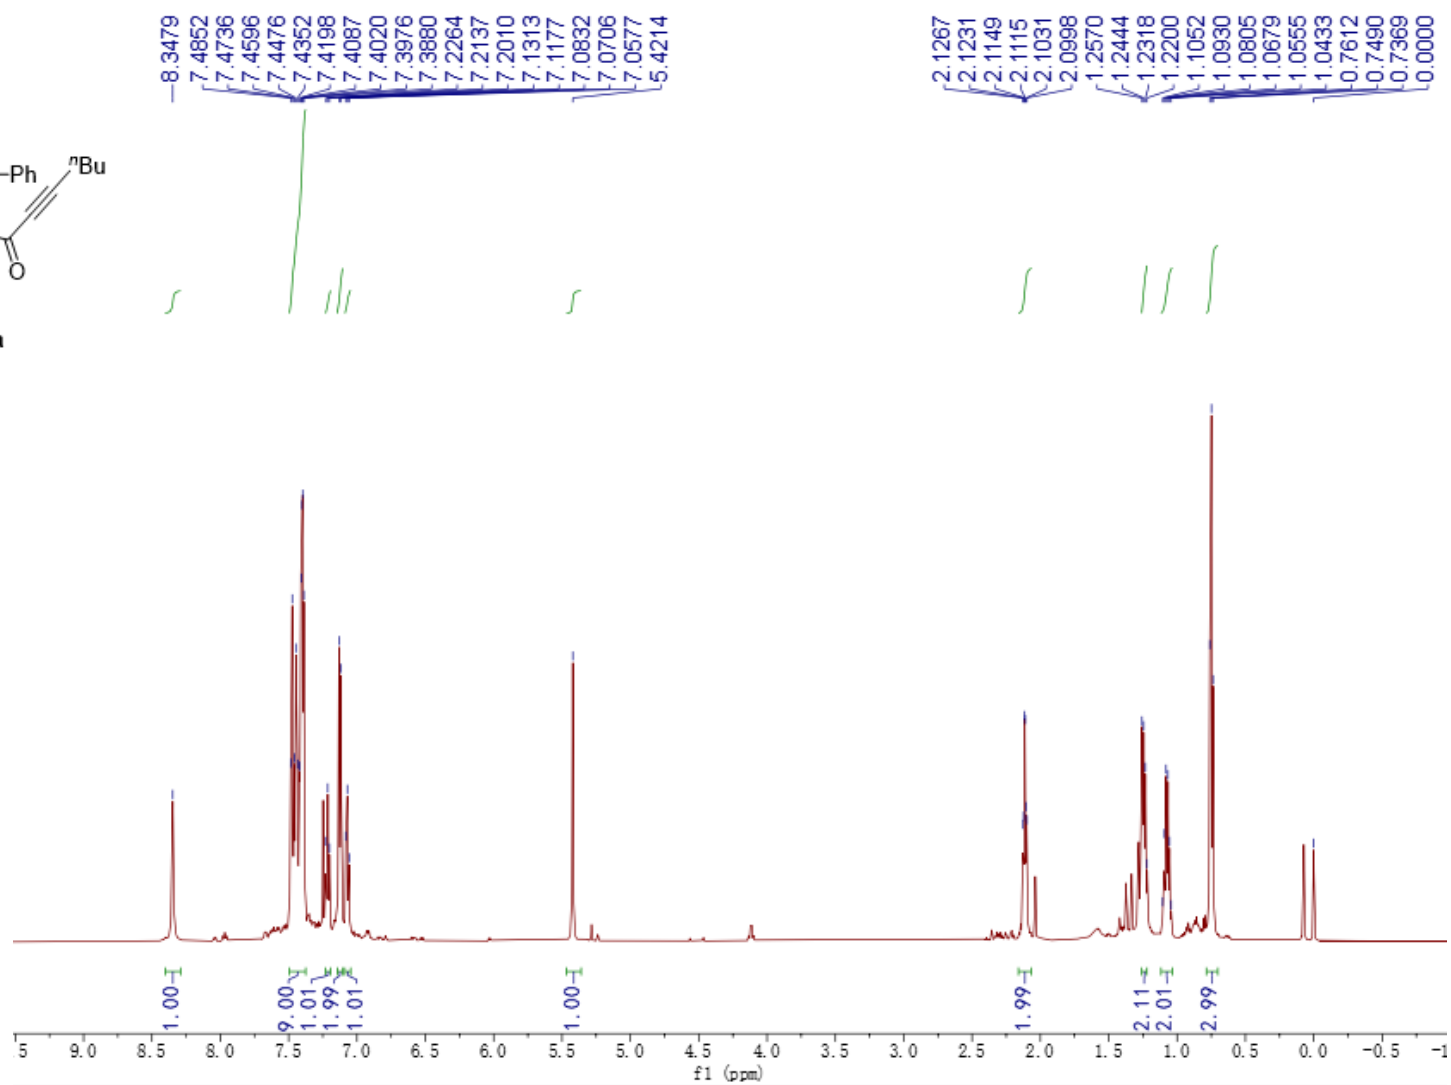

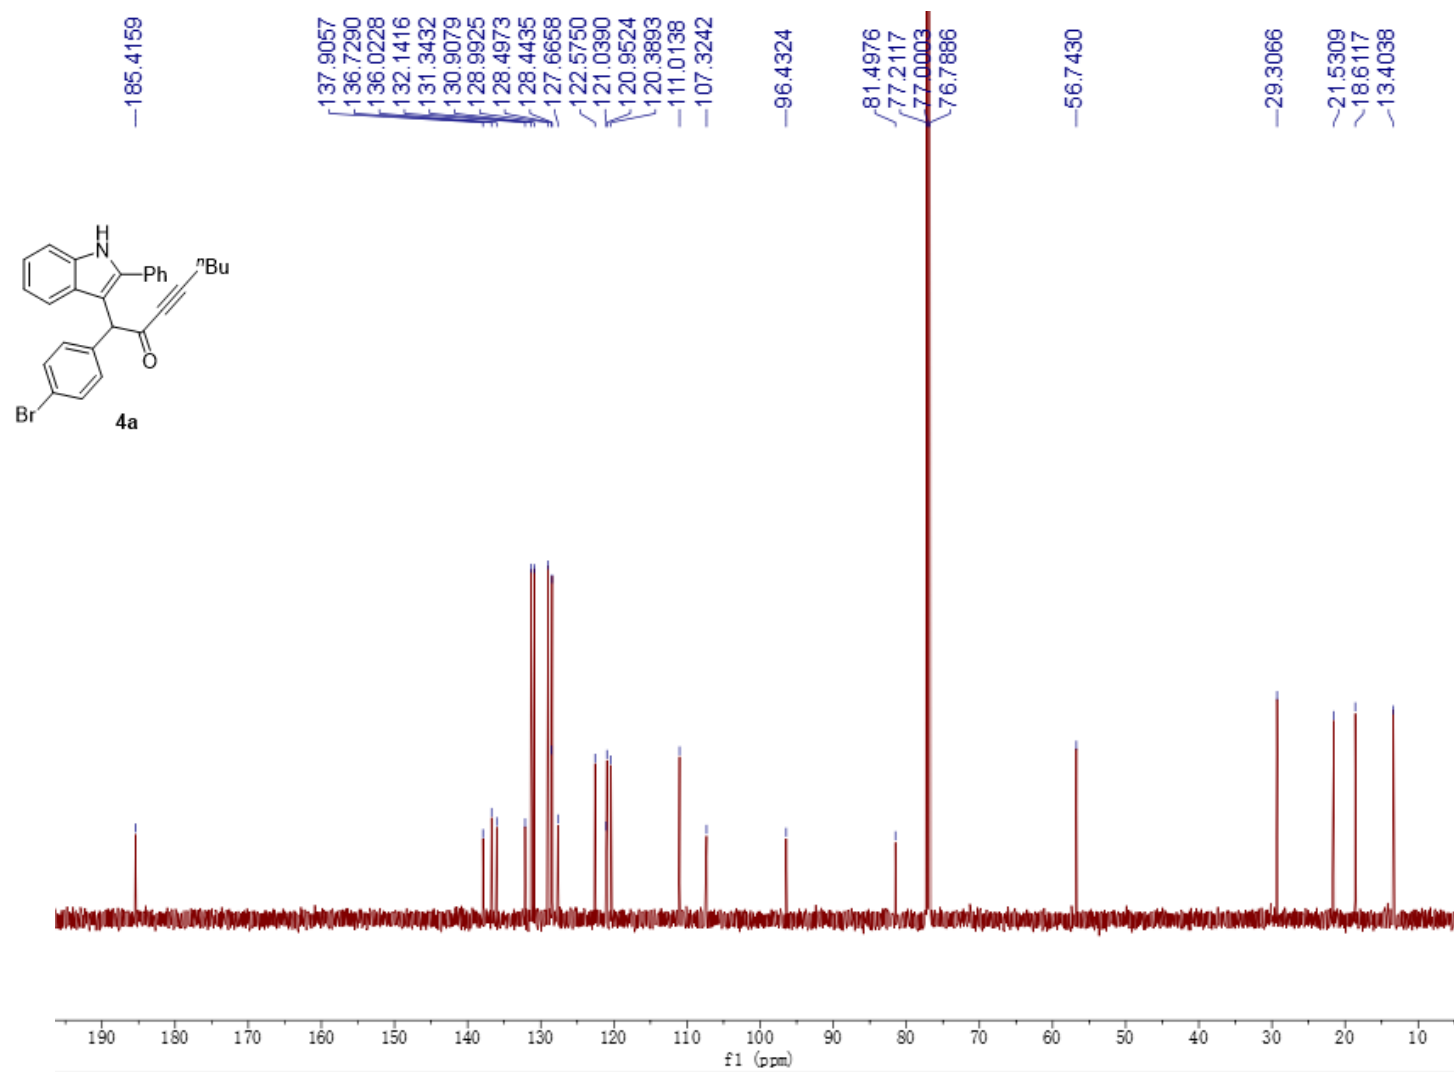

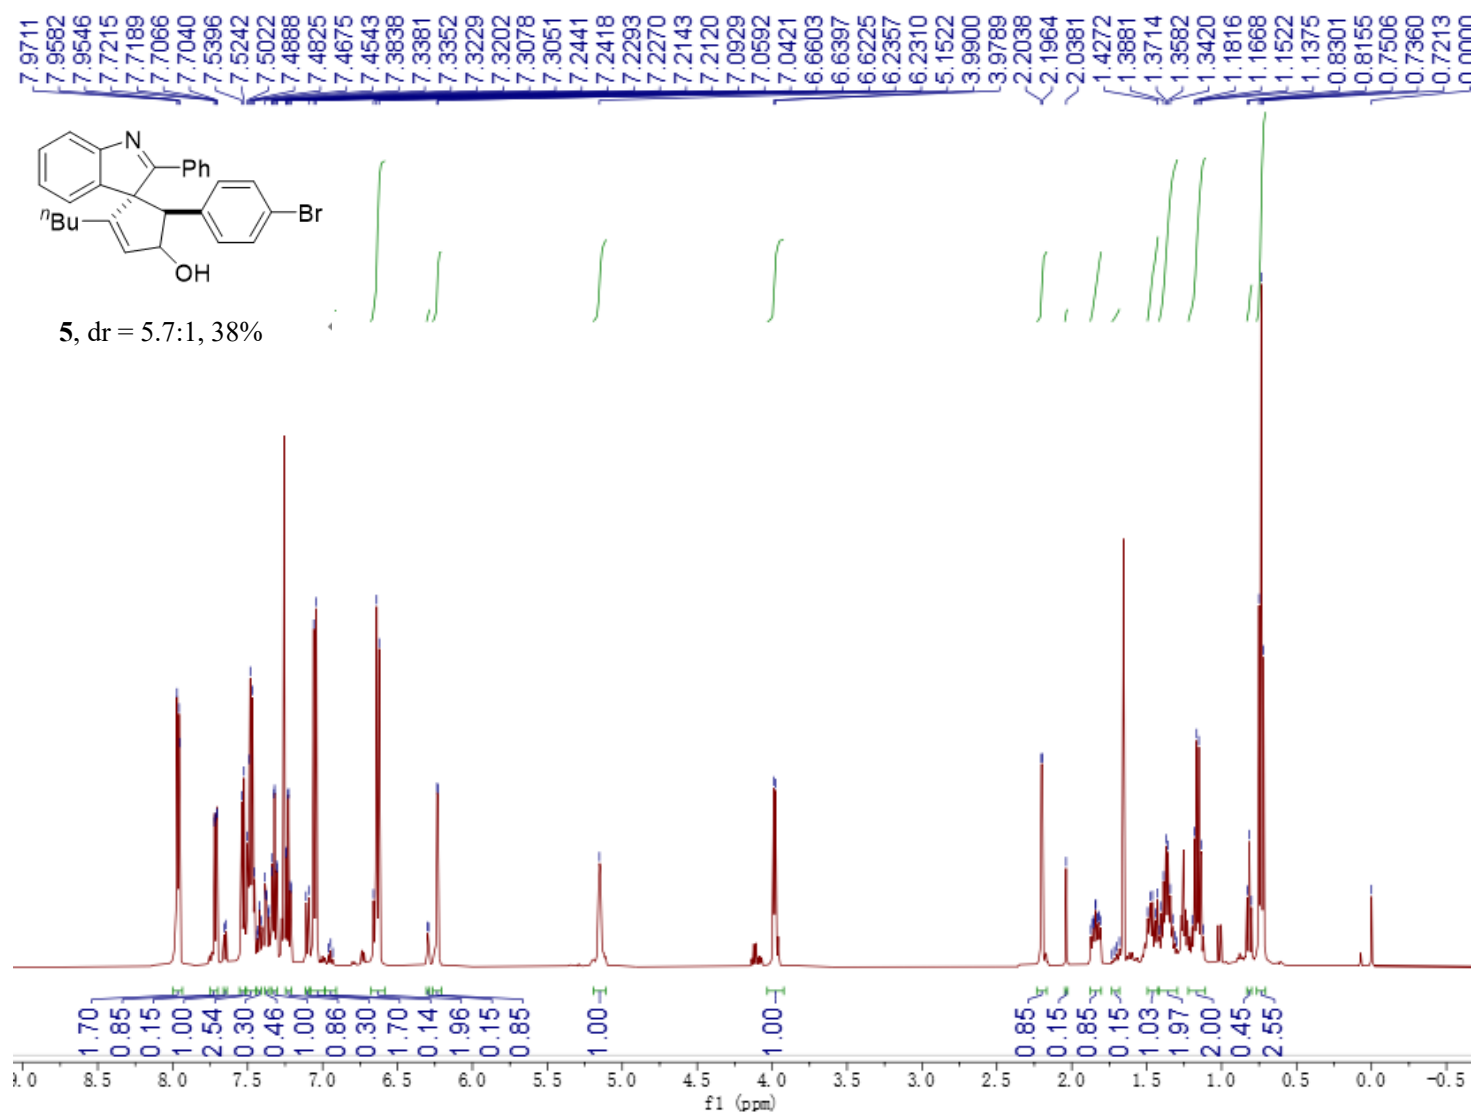

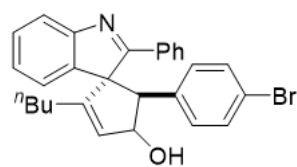

**5**, dr = 5.7:1, 38%

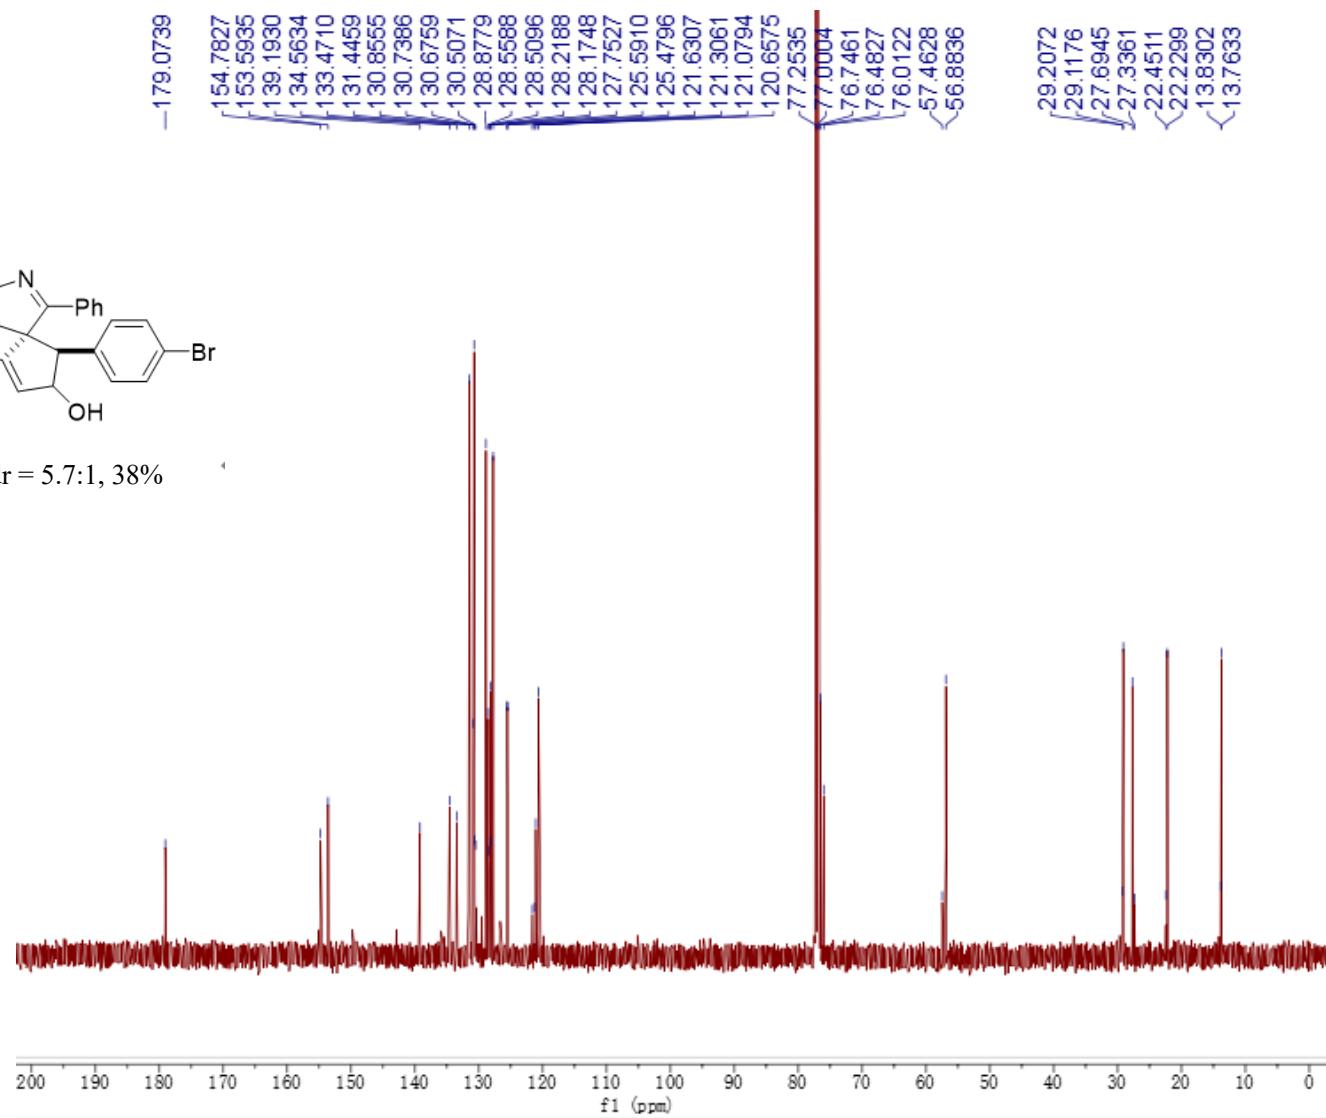

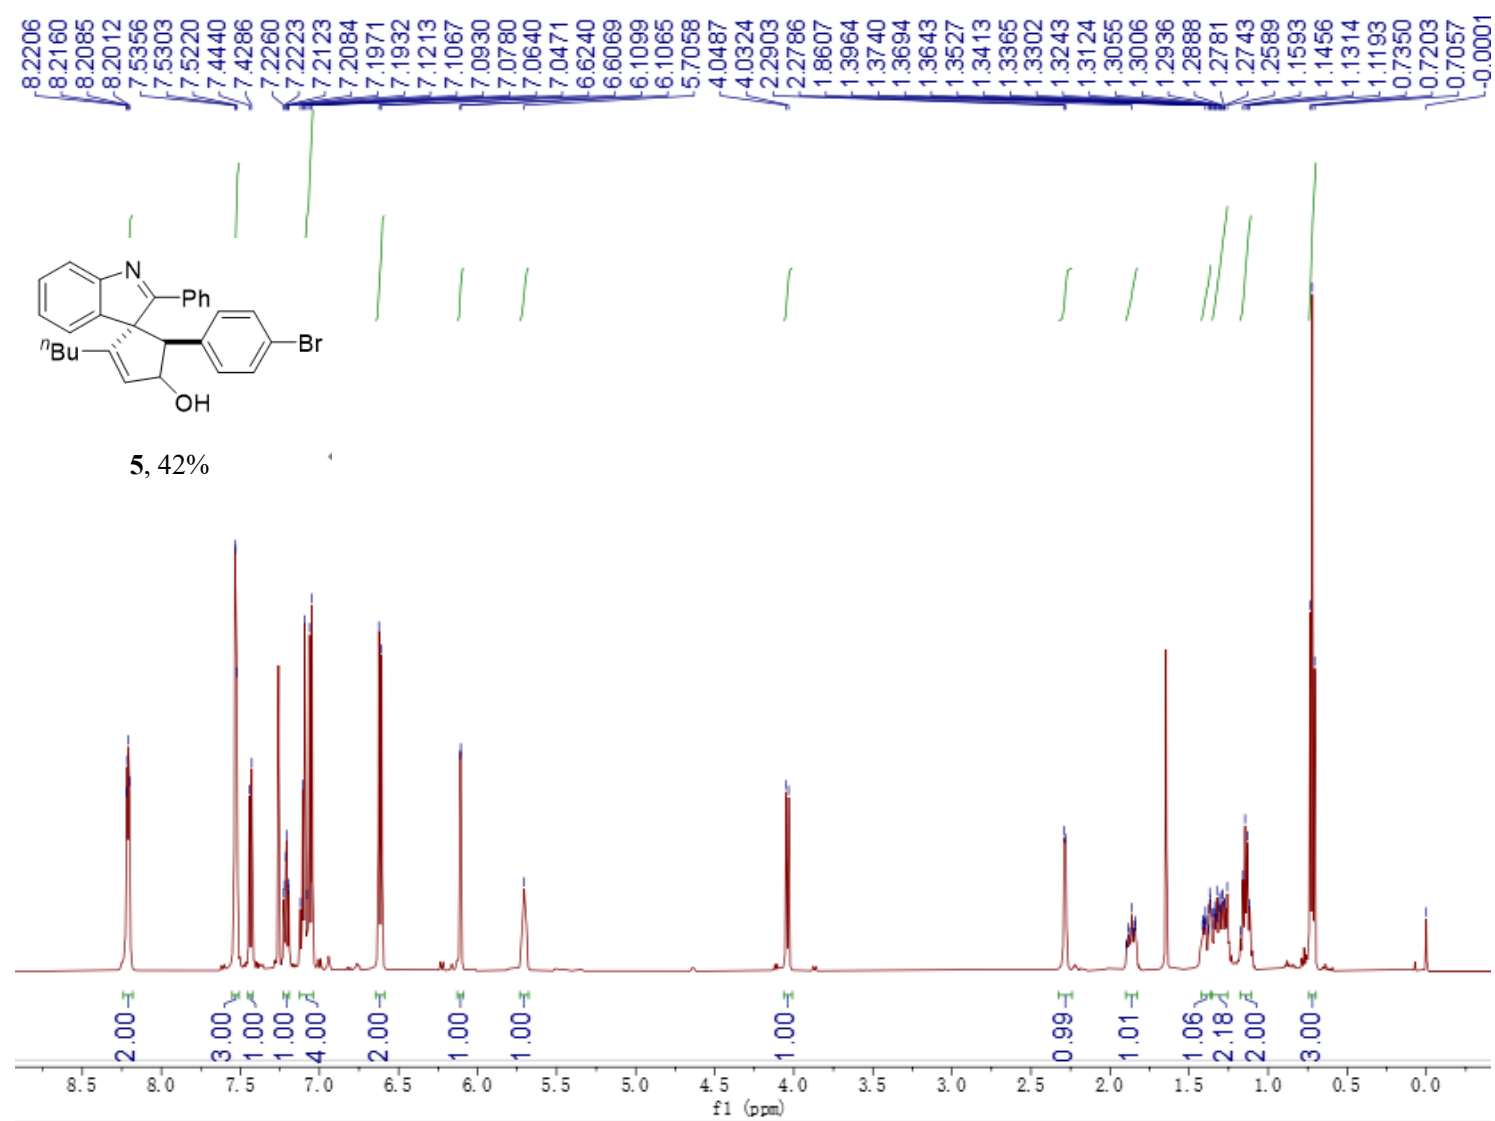

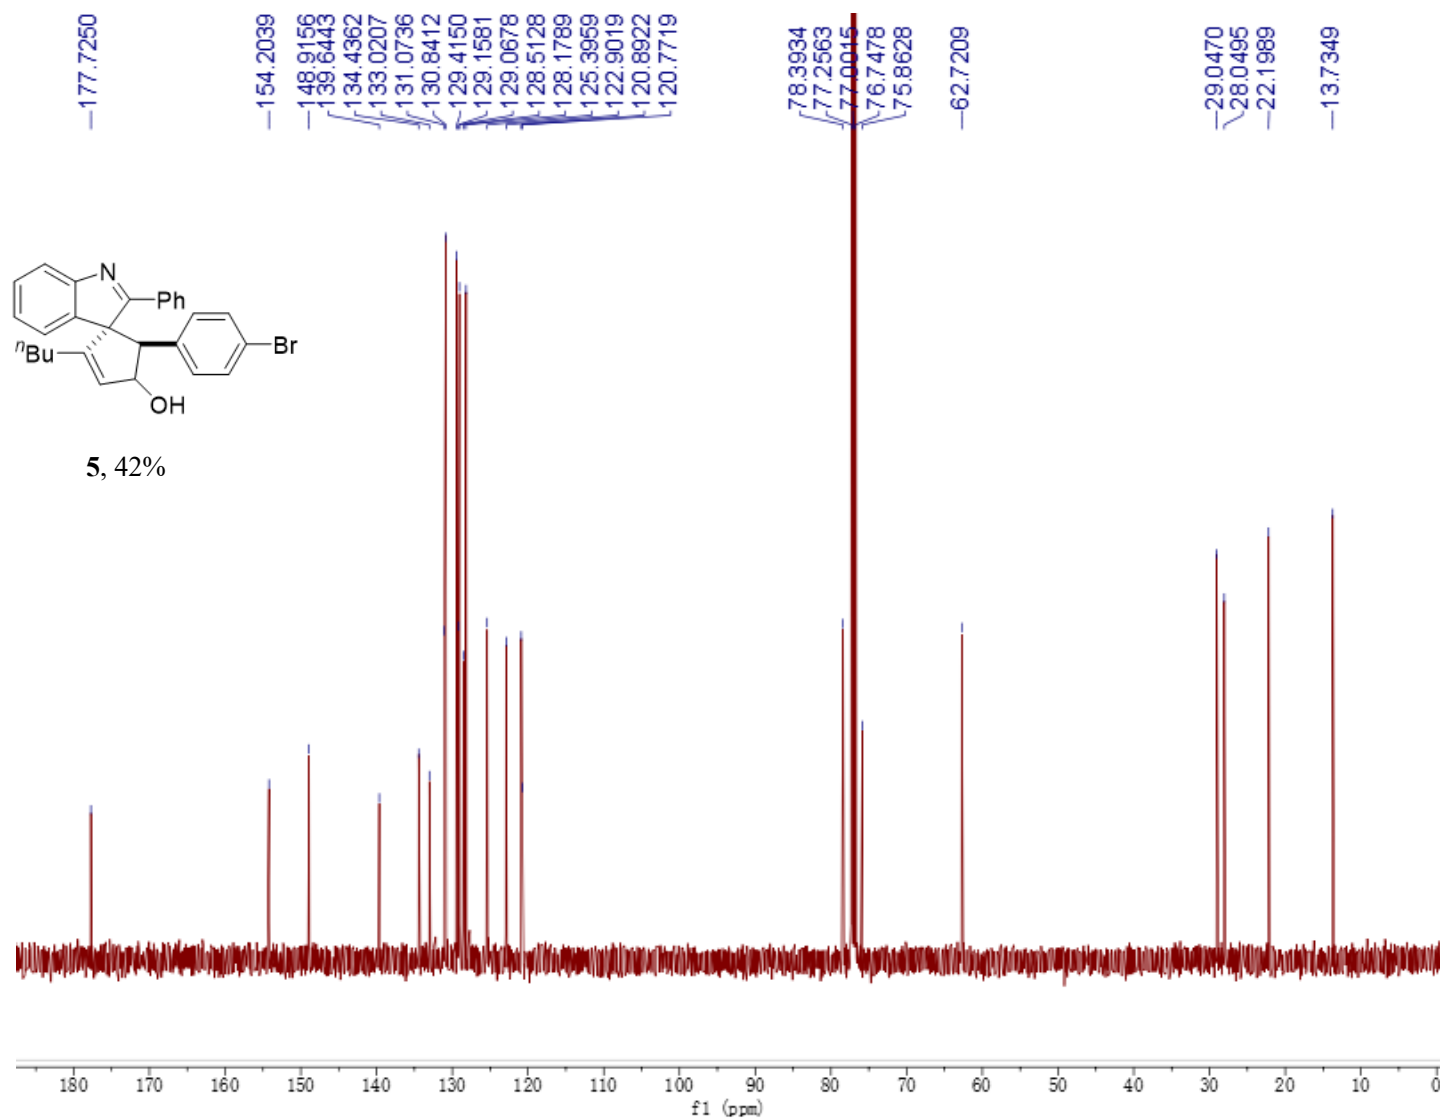

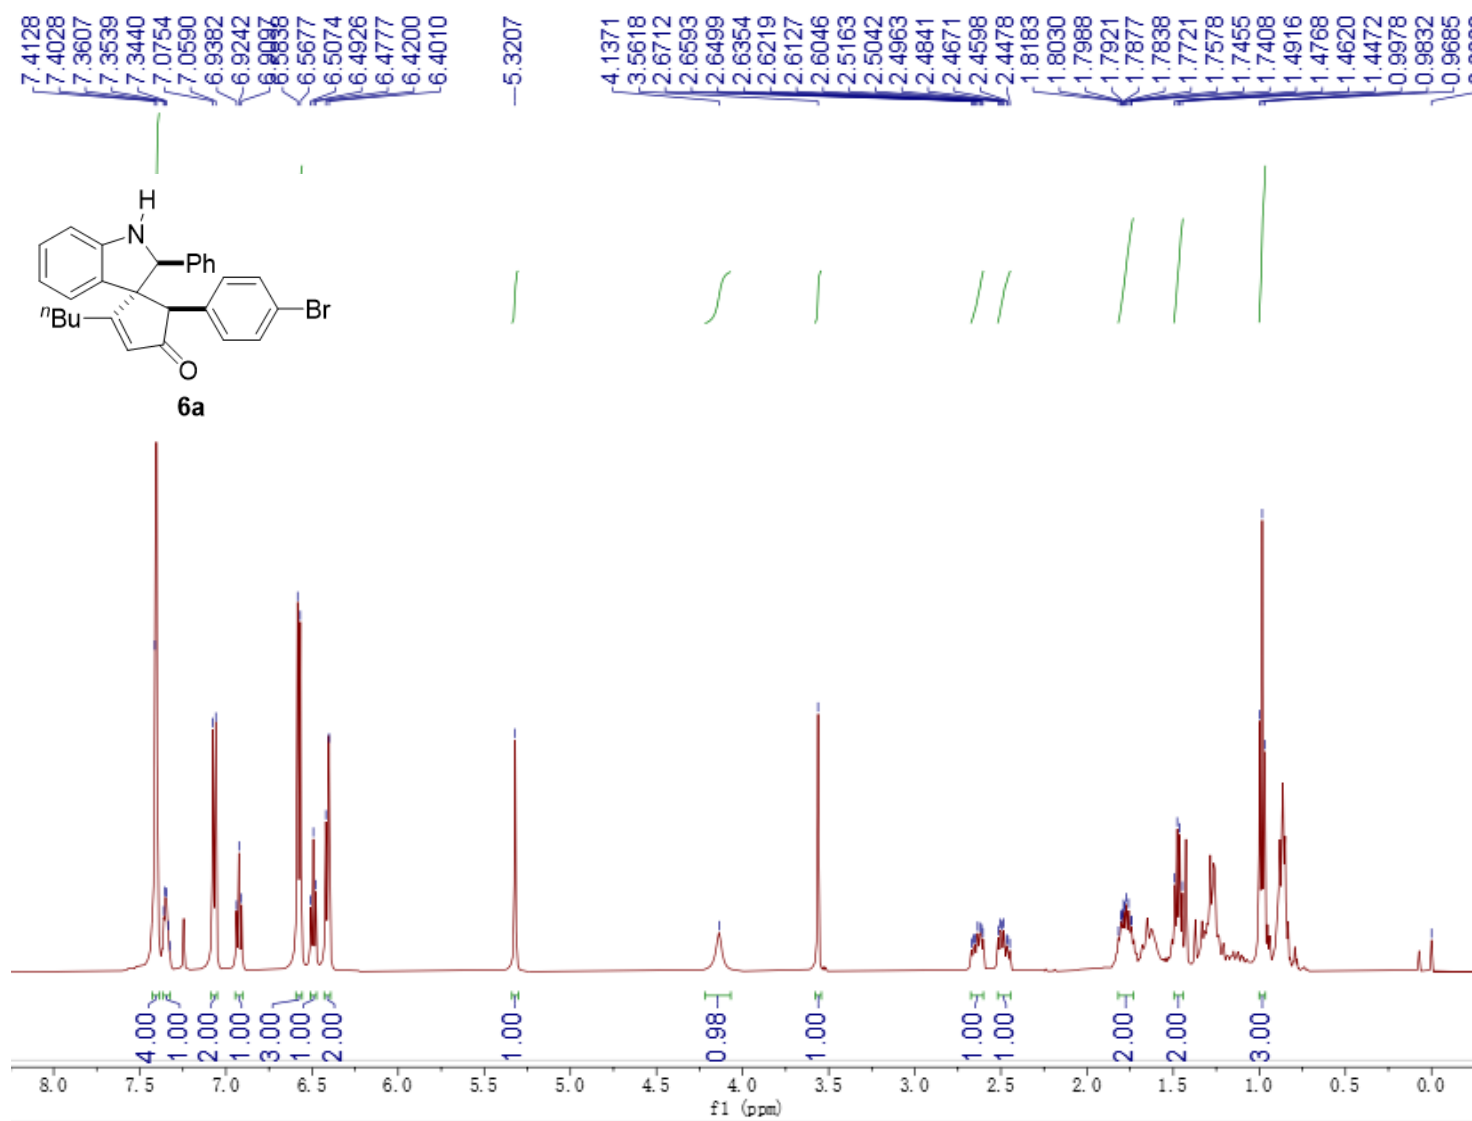

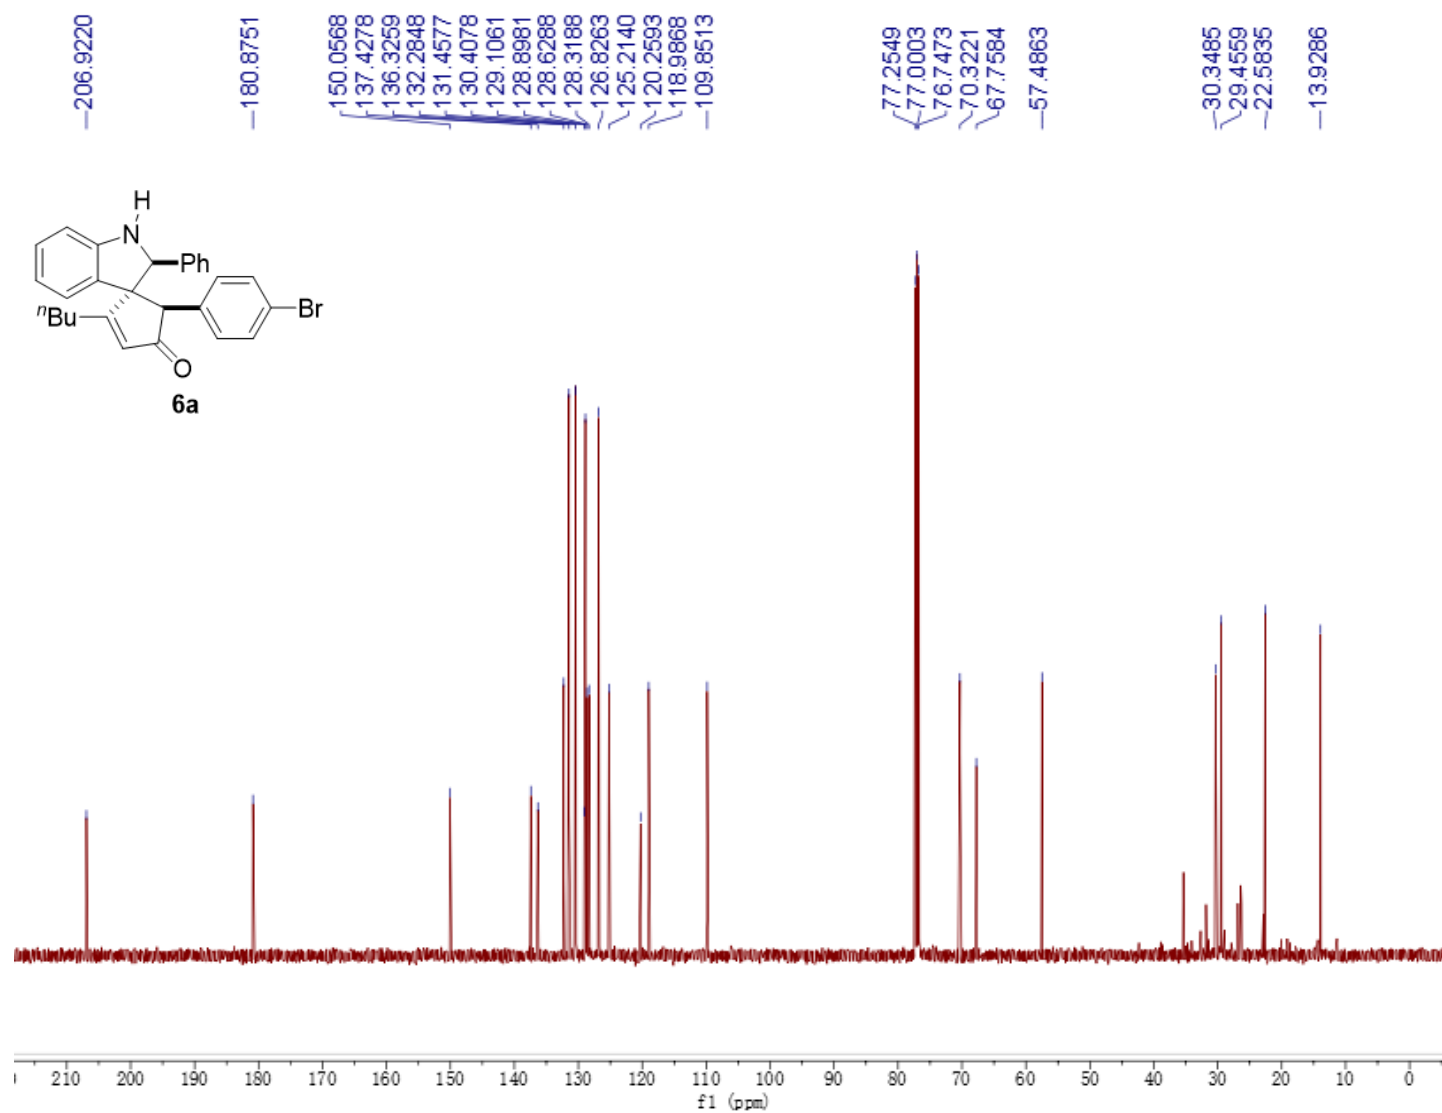



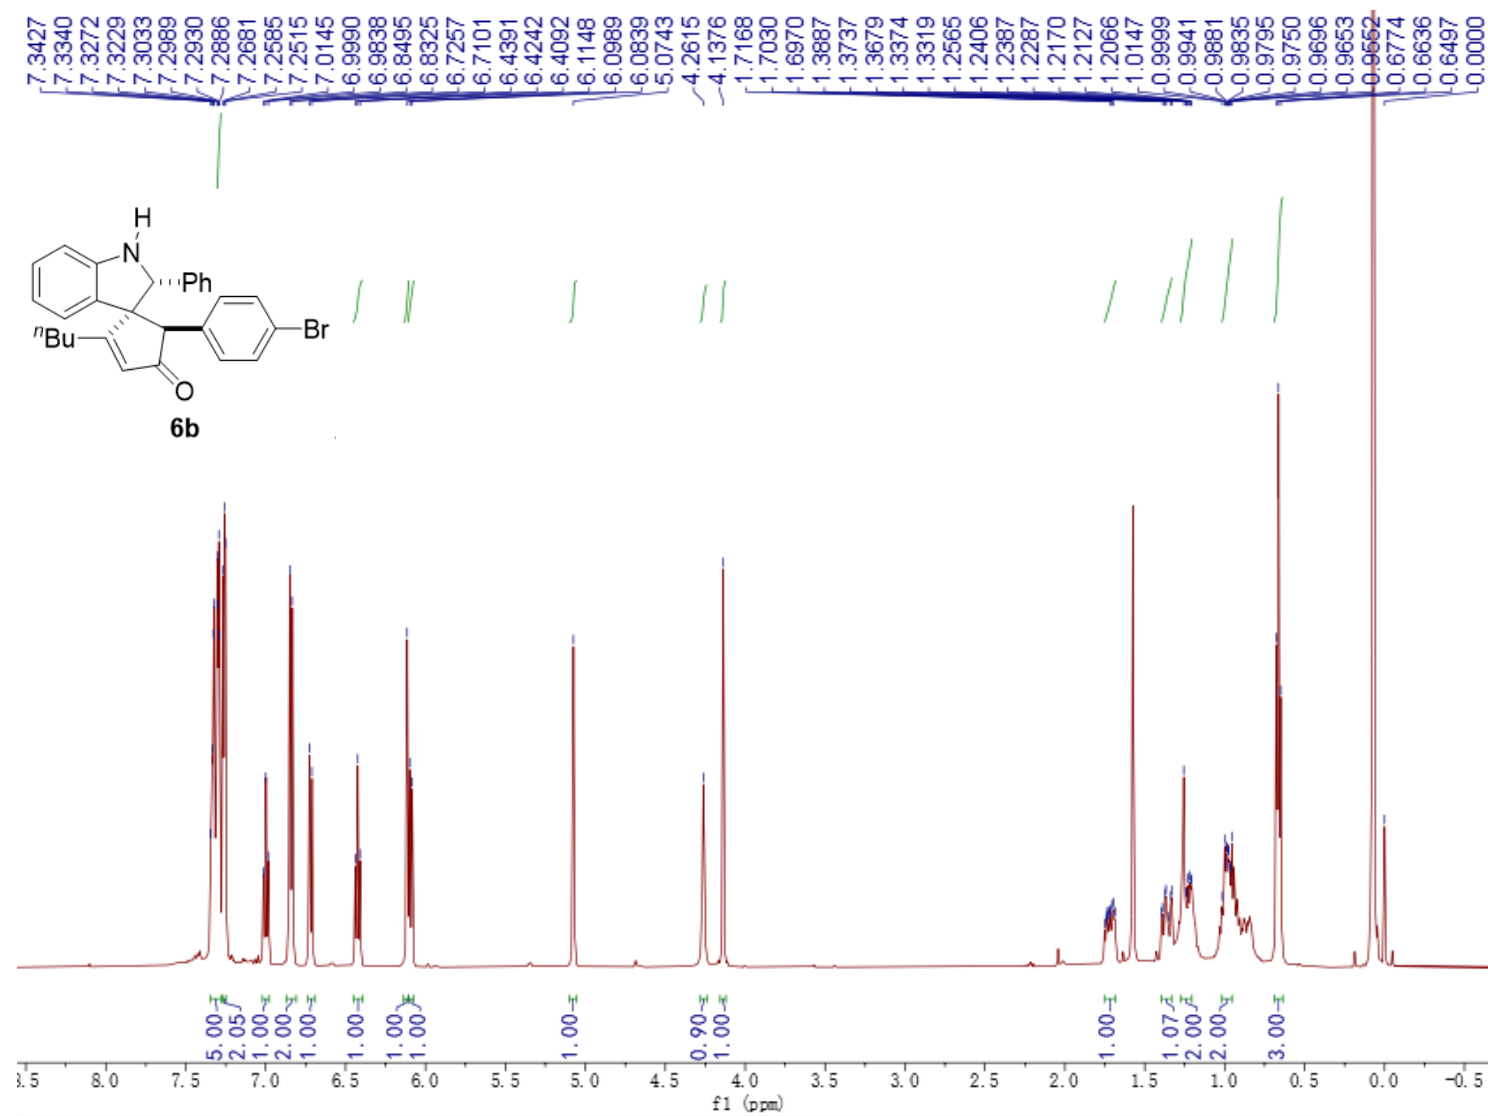

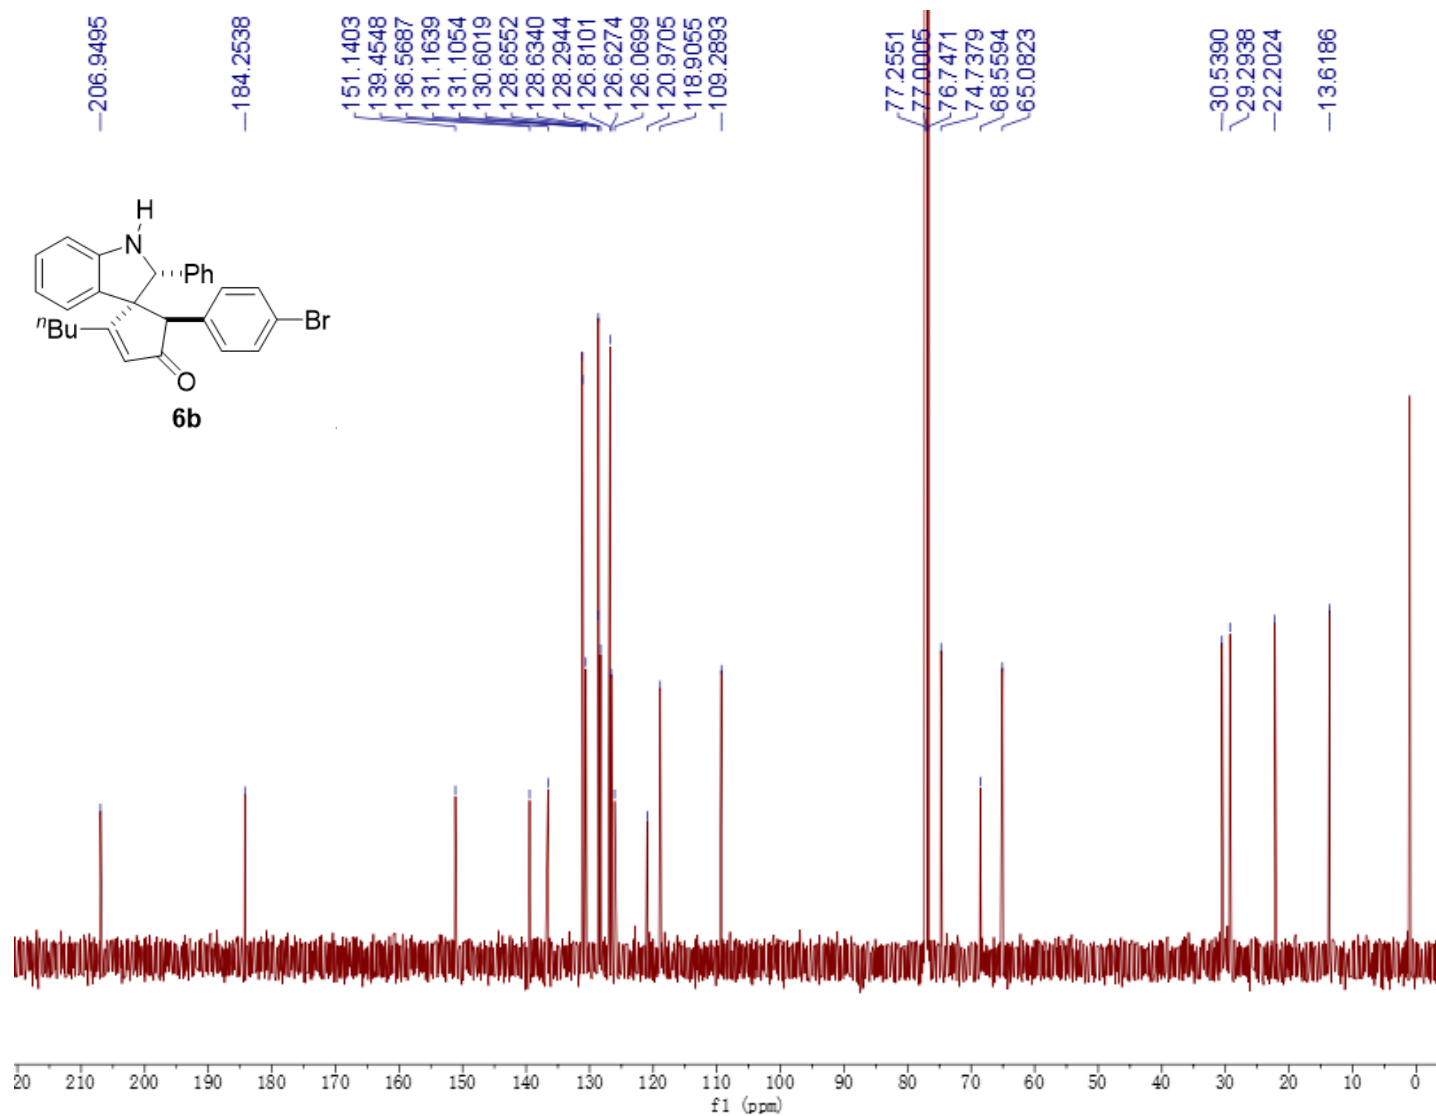

# Mass Spectrum List Report

## Analysis Info

Analysis Name D:\Data\chem. dep\liulu\ZYT-1P\_P1-C-1\_01\_50452.d  
 Method Tune\_pos\_low\_LC with calibration\_2min\_20210727.m  
 Sample Name ZYT-1P  
 Comment

Acquisition Date 4/15/2024 2:08:18 PM

Operator ECNU-Chem  
 Instrument maXis impact 282001.00122

## Acquisition Parameter

|             |          |                       |           |                  |           |
|-------------|----------|-----------------------|-----------|------------------|-----------|
| Source Type | ESI      | Ion Polarity          | Positive  | Set Nebulizer    | 1.5 Bar   |
| Focus       | Active   | Set Capillary         | 4500 V    | Set Dry Heater   | 180 °C    |
| Scan Begin  | 50 m/z   | Set End Plate Offset  | -500 V    | Set Dry Gas      | 6.0 l/min |
| Scan End    | 1350 m/z | Set Collision Cell RF | 700.0 Vpp | Set Divert Valve | Waste     |

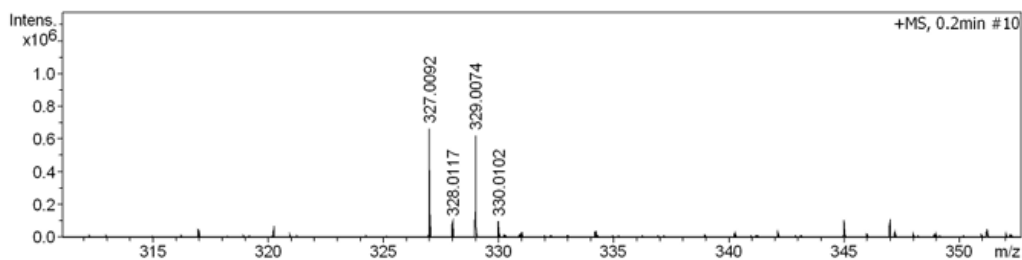

| # | m/z      | Res.  | S/N    | I      | I %   | FWHM   |
|---|----------|-------|--------|--------|-------|--------|
| 1 | 327.0092 | 24441 | 1105.8 | 665604 | 100.0 | 0.0134 |
| 2 | 328.0117 | 19755 | 165.2  | 99588  | 15.0  | 0.0166 |
| 3 | 329.0074 | 23641 | 1028.5 | 621032 | 93.3  | 0.0139 |
| 4 | 330.0102 | 18484 | 163.1  | 98852  | 14.9  | 0.0179 |

| Meas. m/z | # | Ion Formula   | m/z      | err [ppm] | mSigma | Score | rdb    | e <sup>-</sup> | Conf | N-Rule |
|-----------|---|---------------|----------|-----------|--------|-------|--------|----------------|------|--------|
| 327.0092  | 1 | C14H13BrN2NaO | 327.0103 | 3.4       | 28.8   | 1     | 100.00 | 8.5            | even | ok     |

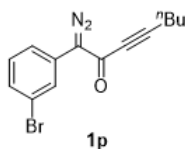

# Mass Spectrum List Report

## Analysis Info

Analysis Name D:\Data\chem. dep\liulu\ZYT-1Q\_P1-C-2\_01\_50453.d  
 Method Tune\_pos\_low\_LC with calibration\_2min\_20210727.m  
 Sample Name ZYT-1Q  
 Comment

Acquisition Date 4/15/2024 2:11:27 PM

Operator ECNU-Chem  
 Instrument maXis impact 282001.00122

## Acquisition Parameter

|             |          |                       |           |                  |           |
|-------------|----------|-----------------------|-----------|------------------|-----------|
| Source Type | ESI      | Ion Polarity          | Positive  | Set Nebulizer    | 1.5 Bar   |
| Focus       | Active   | Set Capillary         | 4500 V    | Set Dry Heater   | 180 °C    |
| Scan Begin  | 50 m/z   | Set End Plate Offset  | -500 V    | Set Dry Gas      | 6.0 l/min |
| Scan End    | 1350 m/z | Set Collision Cell RF | 700.0 Vpp | Set Divert Valve | Waste     |

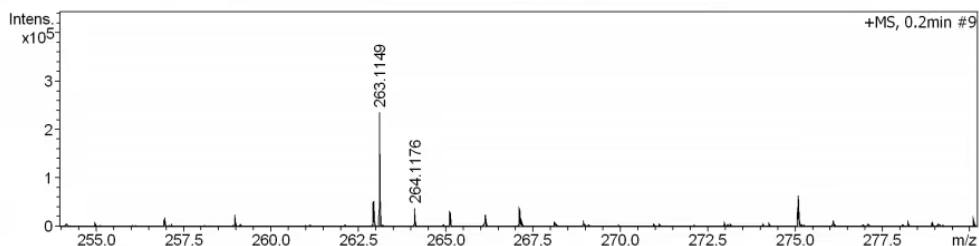

| # | m/z      | Res.  | S/N   | I      | I %   | FWHM   |
|---|----------|-------|-------|--------|-------|--------|
| 1 | 263.1149 | 20070 | 568.9 | 234456 | 100.0 | 0.0131 |
| 2 | 264.1176 | 17340 | 91.5  | 37860  | 16.1  | 0.0152 |

| Meas. m/z | # | Ion Formula                                        | m/z      | err [ppm] | mSigma | Score | rdb    | e <sup>-</sup> | Conf | N-Rule |
|-----------|---|----------------------------------------------------|----------|-----------|--------|-------|--------|----------------|------|--------|
| 263.1149  | 1 | C <sub>15</sub> H <sub>16</sub> N <sub>2</sub> NaO | 263.1155 | 2.4       | 10.9   | 1     | 100.00 | 8.5            | even | ok     |

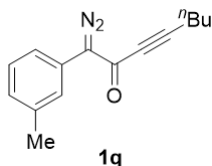

# Mass Spectrum List Report

## Analysis Info

Analysis Name D:\Data\chem. dep\liulu\ZYT-1S\_P1-C-5\_01\_50456.d  
 Method Tune\_pos\_low\_LC with calibration\_2min\_20210727.m  
 Sample Name ZYT-1S  
 Comment

Acquisition Date 4/15/2024 2:21:03 PM

Operator ECNU-Chem  
 Instrument maXis impact 282001.00122

## Acquisition Parameter

|             |          |                       |           |                  |           |
|-------------|----------|-----------------------|-----------|------------------|-----------|
| Source Type | ESI      | Ion Polarity          | Positive  | Set Nebulizer    | 1.5 Bar   |
| Focus       | Active   | Set Capillary         | 4500 V    | Set Dry Heater   | 180 °C    |
| Scan Begin  | 50 m/z   | Set End Plate Offset  | -500 V    | Set Dry Gas      | 6.0 l/min |
| Scan End    | 1350 m/z | Set Collision Cell RF | 700.0 Vpp | Set Divert Valve | Waste     |

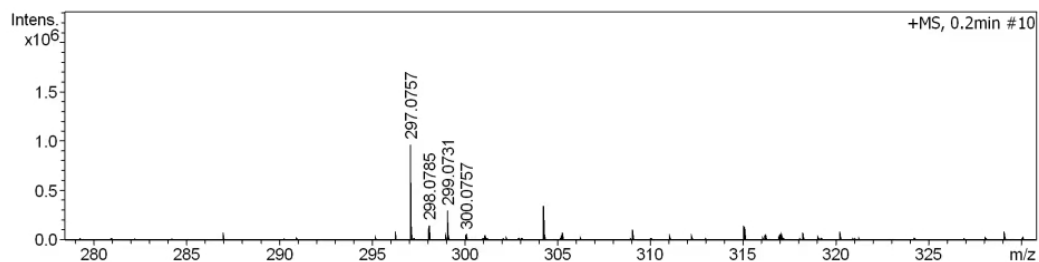

| # | m/z      | Res.  | S/N    | I      | I %   | FWHM   |
|---|----------|-------|--------|--------|-------|--------|
| 1 | 297.0757 | 25902 | 1706.3 | 967064 | 100.0 | 0.0115 |
| 2 | 298.0785 | 17807 | 254.1  | 144488 | 14.9  | 0.0167 |
| 3 | 299.0731 | 19988 | 523.0  | 298488 | 30.9  | 0.0150 |
| 4 | 300.0757 | 15967 | 89.9   | 51472  | 5.3   | 0.0188 |

| Meas. m/z | # | Ion Formula   | m/z      | err [ppm] | mSigma | Score | rdb    | e <sup>-</sup> | Conf | N-Rule |
|-----------|---|---------------|----------|-----------|--------|-------|--------|----------------|------|--------|
| 297.0757  | 1 | C15H15ClN2NaO | 297.0765 | 2.8       | 15.9   | 1     | 100.00 | 8.5            | even | ok     |

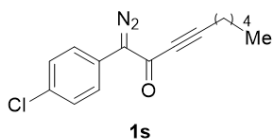

## Mass Spectrum List Report

### Analysis Info

Analysis Name D:\Data\chem. dep\liulu\ZYT-2-39-1\_P1-A-6\_01\_50177.d  
 Method Tune\_pos\_low\_LC with calibration\_2min\_20210727.m  
 Sample Name ZYT-2-39-1  
 Comment

Acquisition Date 4/9/2024 7:05:56 PM

Operator ECNU-Chem  
 Instrument maXis impact 282001.00122

### Acquisition Parameter

|             |          |                       |           |                  |           |
|-------------|----------|-----------------------|-----------|------------------|-----------|
| Source Type | ESI      | Ion Polarity          | Positive  | Set Nebulizer    | 1.5 Bar   |
| Focus       | Active   | Set Capillary         | 4500 V    | Set Dry Heater   | 180 °C    |
| Scan Begin  | 50 m/z   | Set End Plate Offset  | -500 V    | Set Dry Gas      | 6.0 l/min |
| Scan End    | 1350 m/z | Set Collision Cell RF | 700.0 Vpp | Set Divert Valve | Waste     |

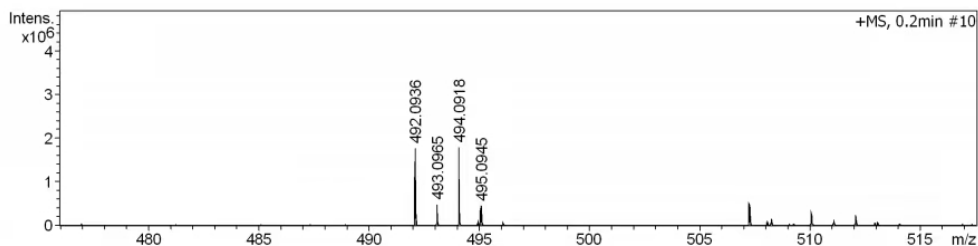

| # | m/z      | Res.  | S/N    | I       | I %   | FWHM   |
|---|----------|-------|--------|---------|-------|--------|
| 1 | 492.0936 | 31703 | 1309.3 | 1762344 | 99.0  | 0.0155 |
| 2 | 493.0965 | 24267 | 356.8  | 482284  | 27.1  | 0.0203 |
| 3 | 494.0918 | 31874 | 1313.0 | 1780364 | 100.0 | 0.0155 |
| 4 | 495.0945 | 23697 | 334.9  | 455532  | 25.6  | 0.0209 |

| Meas. m/z | # | Ion Formula                            | m/z      | err [ppm] | mSigma | Score | rdb    | e <sup>-</sup> Conf | N-Rule |
|-----------|---|----------------------------------------|----------|-----------|--------|-------|--------|---------------------|--------|
| 492.0936  | 1 | C <sub>28</sub> H <sub>24</sub> BrNNaO | 492.0933 | -0.4      | 22.8   | 1     | 100.00 | 16.5 even           | ok     |

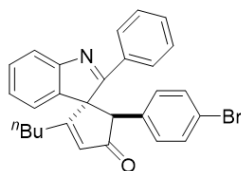

**3a**

## Mass Spectrum List Report

### Analysis Info

Analysis Name D:\Data\chem. dep\lulu\ZYT-2-141\_P1-A-7\_01\_50178.d  
 Method Tune\_pos\_low\_LC with calibration\_2min\_20210727.m  
 Sample Name ZYT-2-141  
 Comment

Acquisition Date 4/9/2024 7:09:06 PM

Operator ECNU-Chem  
 Instrument maXis impact 282001.00122

### Acquisition Parameter

|             |          |                       |           |                  |           |
|-------------|----------|-----------------------|-----------|------------------|-----------|
| Source Type | ESI      | Ion Polarity          | Positive  | Set Nebulizer    | 1.5 Bar   |
| Focus       | Active   | Set Capillary         | 4500 V    | Set Dry Heater   | 180 °C    |
| Scan Begin  | 50 m/z   | Set End Plate Offset  | -500 V    | Set Dry Gas      | 6.0 l/min |
| Scan End    | 1350 m/z | Set Collision Cell RF | 700.0 Vpp | Set Divert Valve | Waste     |

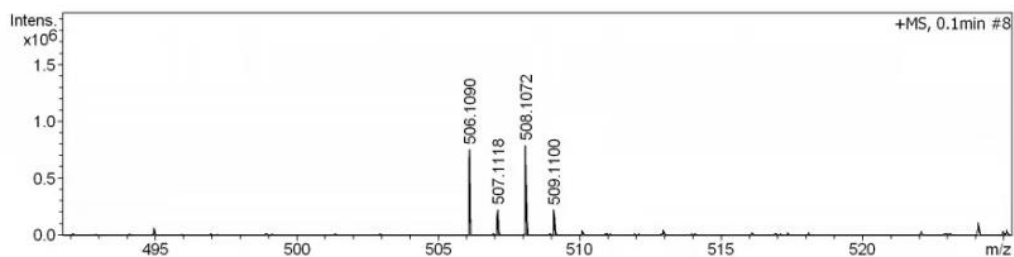

| # | m/z      | Res.  | S/N   | I      | I %   | FWHM   |
|---|----------|-------|-------|--------|-------|--------|
| 1 | 506.1090 | 26247 | 510.1 | 752428 | 95.4  | 0.0193 |
| 2 | 507.1118 | 19372 | 153.5 | 227036 | 28.8  | 0.0262 |
| 3 | 508.1072 | 27441 | 531.9 | 788492 | 100.0 | 0.0185 |
| 4 | 509.1100 | 20470 | 148.5 | 220800 | 28.0  | 0.0249 |

| Meas. m/z | # | Ion Formula                            | m/z      | err [ppm] | mSigma | Score | rdb    | e <sup>-</sup> | Conf | N-Rule |
|-----------|---|----------------------------------------|----------|-----------|--------|-------|--------|----------------|------|--------|
| 506.1090  | 1 | C <sub>29</sub> H <sub>26</sub> BrNNaO | 506.1090 | -0.0      | 18.3   | 1     | 100.00 | 16.5           | even | ok     |

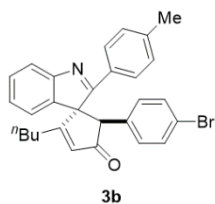

# Mass Spectrum List Report

## Analysis Info

Analysis Name D:\Data\chem. dep\lulu\ZYT-2-149\_P1-A-8\_01\_50179.d  
 Method Tune\_pos\_low\_LC with calibration\_2min\_20210727.m  
 Sample Name ZYT-2-149  
 Comment

Acquisition Date 4/9/2024 7:12:14 PM  
 Operator ECNU-Chem  
 Instrument maXis impact 282001.00122

## Acquisition Parameter

|             |          |                       |           |                  |           |
|-------------|----------|-----------------------|-----------|------------------|-----------|
| Source Type | ESI      | Ion Polarity          | Positive  | Set Nebulizer    | 1.5 Bar   |
| Focus       | Active   | Set Capillary         | 4500 V    | Set Dry Heater   | 180 °C    |
| Scan Begin  | 50 m/z   | Set End Plate Offset  | -500 V    | Set Dry Gas      | 6.0 l/min |
| Scan End    | 1350 m/z | Set Collision Cell RF | 700.0 Vpp | Set Divert Valve | Waste     |

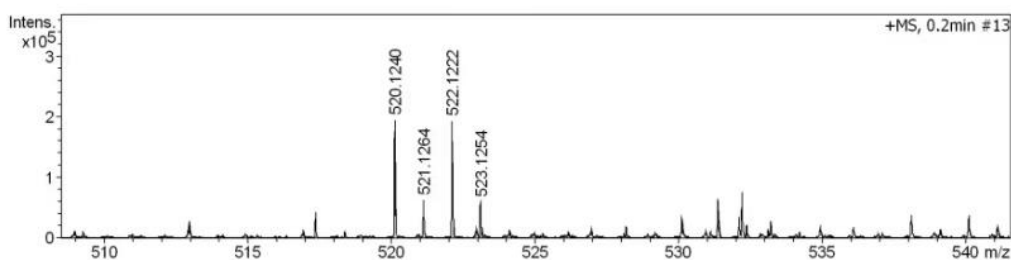

| # | m/z      | Res.  | S/N   | I      | I %   | FWHM   |
|---|----------|-------|-------|--------|-------|--------|
| 1 | 520.1240 | 19287 | 154.6 | 194608 | 100.0 | 0.0270 |
| 2 | 521.1264 | 16317 | 50.0  | 63032  | 32.4  | 0.0319 |
| 3 | 522.1222 | 19526 | 152.2 | 192572 | 99.0  | 0.0267 |
| 4 | 523.1254 | 16680 | 47.1  | 59692  | 30.7  | 0.0314 |

| Meas. m/z | # | Ion Formula  | m/z      | err [ppm] | mSigma | Score | rdb    | e <sup>-</sup> Conf | N-Rule     |
|-----------|---|--------------|----------|-----------|--------|-------|--------|---------------------|------------|
| 520.1240  | 1 | C30H28BrNNaO | 520.1246 | 1.3       | 14.1   | 1     | 100.00 | 16.5                | even<br>ok |

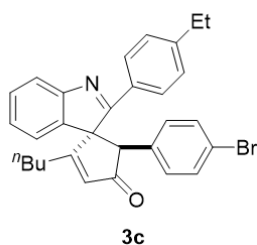



# Mass Spectrum List Report

## Analysis Info

Analysis Name D:\Data\chem. dep\liulu\ZYT-2-170\_P1-A-9\_01\_50180.d  
 Method Tune\_pos\_low\_LC with calibration\_2min\_20210727.m  
 Sample Name ZYT-2-170  
 Comment

Acquisition Date 4/9/2024 7:15:21 PM

Operator ECNU-Chem  
 Instrument maXis impact 282001.00122

## Acquisition Parameter

|             |          |                       |           |                  |           |
|-------------|----------|-----------------------|-----------|------------------|-----------|
| Source Type | ESI      | Ion Polarity          | Positive  | Set Nebulizer    | 1.5 Bar   |
| Focus       | Active   | Set Capillary         | 4500 V    | Set Dry Heater   | 180 °C    |
| Scan Begin  | 50 m/z   | Set End Plate Offset  | -500 V    | Set Dry Gas      | 6.0 l/min |
| Scan End    | 1350 m/z | Set Collision Cell RF | 700.0 Vpp | Set Divert Valve | Waste     |

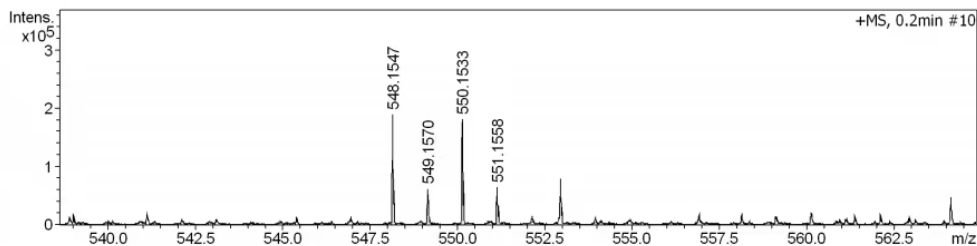

| # | m/z      | Res.  | S/N   | I      | I%    | FWHM   |
|---|----------|-------|-------|--------|-------|--------|
| 1 | 548.1547 | 20108 | 112.3 | 188692 | 100.0 | 0.0273 |
| 2 | 549.1570 | 16593 | 37.1  | 62408  | 33.1  | 0.0331 |
| 3 | 550.1533 | 18794 | 107.1 | 181016 | 95.9  | 0.0293 |
| 4 | 551.1558 | 18135 | 38.0  | 64484  | 34.2  | 0.0304 |

| Meas. m/z | # | Ion Formula  | m/z      | err [ppm] | mSigma | Score | rdb    | e <sup>-</sup> | Conf | N-Rule |
|-----------|---|--------------|----------|-----------|--------|-------|--------|----------------|------|--------|
| 548.1547  | 1 | C32H32BrNNaO | 548.1559 | 2.3       | 23.1   | 1     | 100.00 | 16.5           | even | ok     |

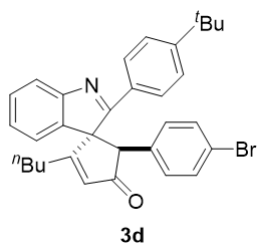

# Mass Spectrum List Report

## Analysis Info

Analysis Name D:\Data\chem. dep\liulu\ZYT-2-143\_P1-B-1\_01\_50181.d  
 Method Tune\_pos\_low\_LC with calibration\_2min\_20210727.m  
 Sample Name ZYT-2-143  
 Comment

Acquisition Date 4/9/2024 7:18:28 PM  
 Operator ECNU-Chem  
 Instrument maXis impact 282001.00122

## Acquisition Parameter

|             |          |                       |           |                  |           |
|-------------|----------|-----------------------|-----------|------------------|-----------|
| Source Type | ESI      | Ion Polarity          | Positive  | Set Nebulizer    | 1.5 Bar   |
| Focus       | Active   | Set Capillary         | 4500 V    | Set Dry Heater   | 180 °C    |
| Scan Begin  | 50 m/z   | Set End Plate Offset  | -500 V    | Set Dry Gas      | 6.0 l/min |
| Scan End    | 1350 m/z | Set Collision Cell RF | 700.0 Vpp | Set Divert Valve | Waste     |

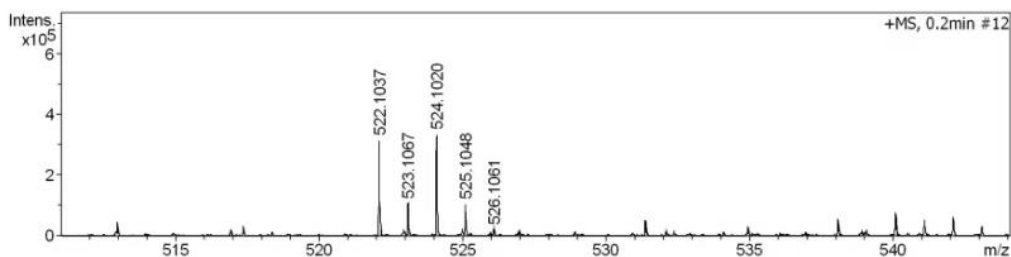

| # | m/z      | Res.  | S/N   | I      | I %   | FWHM   |
|---|----------|-------|-------|--------|-------|--------|
| 1 | 522.1037 | 20294 | 236.7 | 314532 | 94.2  | 0.0257 |
| 2 | 523.1067 | 18445 | 79.6  | 106048 | 31.8  | 0.0284 |
| 3 | 524.1020 | 20692 | 250.0 | 333792 | 100.0 | 0.0253 |
| 4 | 525.1048 | 17280 | 78.6  | 105068 | 31.5  | 0.0304 |
| 5 | 526.1061 | 13367 | 14.9  | 19984  | 6.0   | 0.0394 |

| Meas. m/z | # | Ion Formula   | m/z      | err [ppm] | mSigma | Score | rdb    | e <sup>-</sup> | Conf | N-Rule |
|-----------|---|---------------|----------|-----------|--------|-------|--------|----------------|------|--------|
| 522.1037  | 1 | C29H26BrNNaO2 | 522.1039 | 0.5       | 13.9   | 1     | 100.00 | 16.5           | even | ok     |

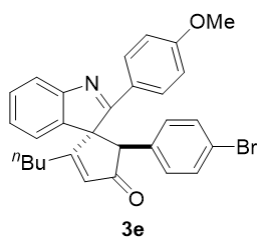

# Mass Spectrum List Report

## Analysis Info

Analysis Name D:\Data\chem. dep\lulu\ZYT-2-131\_P1-A-2\_01\_50334.d  
 Method Tune\_pos\_low\_LC with calibration\_2min\_20210727.m  
 Sample Name ZYT-2-131  
 Comment

Acquisition Date 4/12/2024 12:11:23 PM  
 Operator ECNU-Chem  
 Instrument maXis impact 282001.00122

## Acquisition Parameter

|             |          |                       |           |                  |           |
|-------------|----------|-----------------------|-----------|------------------|-----------|
| Source Type | ESI      | Ion Polarity          | Positive  | Set Nebulizer    | 1.5 Bar   |
| Focus       | Active   | Set Capillary         | 4500 V    | Set Dry Heater   | 180 °C    |
| Scan Begin  | 50 m/z   | Set End Plate Offset  | -500 V    | Set Dry Gas      | 6.0 l/min |
| Scan End    | 1350 m/z | Set Collision Cell RF | 700.0 Vpp | Set Divert Valve | Waste     |

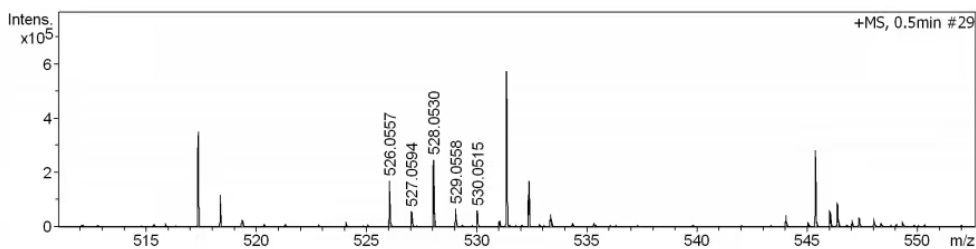

| # | m/z      | Res.  | S/N   | I      | I%    | FWHM   |
|---|----------|-------|-------|--------|-------|--------|
| 1 | 526.0557 | 16977 | 243.2 | 170184 | 68.9  | 0.0310 |
| 2 | 527.0594 | 16256 | 80.5  | 56348  | 22.8  | 0.0324 |
| 3 | 528.0530 | 20161 | 352.4 | 246924 | 100.0 | 0.0262 |
| 4 | 529.0558 | 17413 | 97.1  | 68052  | 27.6  | 0.0304 |
| 5 | 530.0515 | 14881 | 87.3  | 61168  | 24.8  | 0.0356 |

| Meas. m/z | # | Ion Formula    | m/z      | err [ppm] | mSigma | Score | rdb    | e <sup>-</sup> Conf | N-Rule  |
|-----------|---|----------------|----------|-----------|--------|-------|--------|---------------------|---------|
| 526.0557  | 1 | C28H23BrClNNaO | 526.0544 | -2.5      | 26.7   | 1     | 100.00 | 16.5                | even ok |

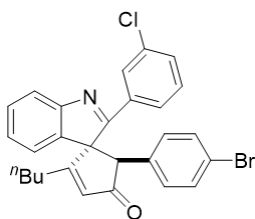

3g

# Mass Spectrum List Report

## Analysis Info

Analysis Name D:\Data\chem. dep\lulu\ZYT-2-145\_P1-B-5\_01\_50185.d  
 Method Tune\_pos\_low\_LC with calibration\_2min\_20210727.m  
 Sample Name ZYT-2-145  
 Comment

Acquisition Date 4/9/2024 7:31:02 PM

Operator ECNU-Chem  
 Instrument maXis impact 282001.00122

## Acquisition Parameter

|             |          |                       |           |                  |           |
|-------------|----------|-----------------------|-----------|------------------|-----------|
| Source Type | ESI      | Ion Polarity          | Positive  | Set Nebulizer    | 1.5 Bar   |
| Focus       | Active   | Set Capillary         | 4500 V    | Set Dry Heater   | 180 °C    |
| Scan Begin  | 50 m/z   | Set End Plate Offset  | -500 V    | Set Dry Gas      | 6.0 l/min |
| Scan End    | 1350 m/z | Set Collision Cell RF | 700.0 Vpp | Set Divert Valve | Waste     |

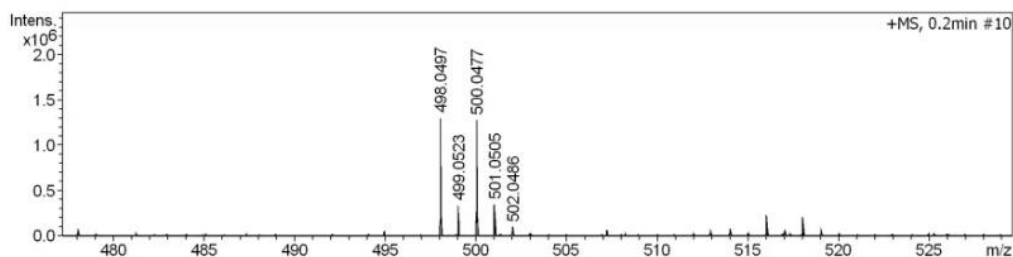

| # | m/z      | Res.  | S/N    | I       | I %   | FWHM   |
|---|----------|-------|--------|---------|-------|--------|
| 1 | 498.0497 | 30943 | 1180.6 | 1297468 | 100.0 | 0.0161 |
| 2 | 499.0523 | 22048 | 305.5  | 336356  | 25.9  | 0.0226 |
| 3 | 500.0477 | 29032 | 1155.9 | 1276856 | 98.4  | 0.0172 |
| 4 | 501.0505 | 22600 | 316.4  | 350000  | 27.0  | 0.0222 |
| 5 | 502.0486 | 14700 | 87.0   | 96348   | 7.4   | 0.0342 |

| Meas. m/z | # | Ion Formula                             | m/z      | err [ppm] | mSigma | Score | rdb    | e <sup>-</sup> | Conf | N-Rule |
|-----------|---|-----------------------------------------|----------|-----------|--------|-------|--------|----------------|------|--------|
| 498.0497  | 1 | C <sub>26</sub> H <sub>22</sub> BrNNaOS | 498.0498 | 0.2       | 27.1   | 2     | 100.00 | 15.5           | even | ok     |

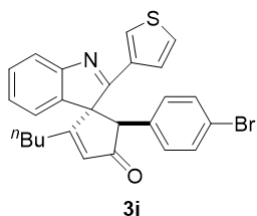

## Mass Spectrum List Report

### Analysis Info

Analysis Name D:\Data\chem. dep\liulu\ZYT-3-189\_P1-A-2\_01\_59756.d  
 Method Tune\_pos\_low\_LC with calibration\_2min\_20210727.m  
 Sample Name ZYT-3-189  
 Comment

Acquisition Date 2/24/2025 2:09:36 PM

Operator ECNU-Chem  
 Instrument maXis impact 282001.00122

### Acquisition Parameter

|             |          |                       |           |                  |           |
|-------------|----------|-----------------------|-----------|------------------|-----------|
| Source Type | ESI      | Ion Polarity          | Positive  | Set Nebulizer    | 1.5 Bar   |
| Focus       | Active   | Set Capillary         | 4500 V    | Set Dry Heater   | 180 °C    |
| Scan Begin  | 50 m/z   | Set End Plate Offset  | -500 V    | Set Dry Gas      | 6.0 l/min |
| Scan End    | 1350 m/z | Set Collision Cell RF | 700.0 Vpp | Set Divert Valve | Waste     |

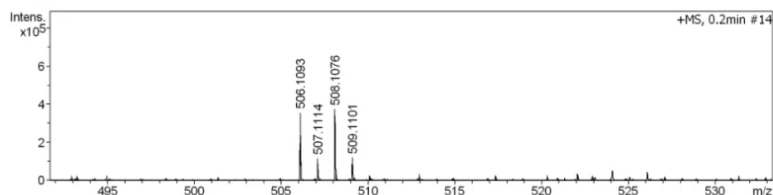

| # | m/z      | Res.  | S/N   | I      | I %   | FWHM   |
|---|----------|-------|-------|--------|-------|--------|
| 1 | 506.1093 | 19417 | 328.4 | 355616 | 95.3  | 0.0261 |
| 2 | 507.1114 | 18105 | 107.4 | 116176 | 31.1  | 0.0280 |
| 3 | 508.1076 | 19544 | 344.9 | 373252 | 100.0 | 0.0260 |
| 4 | 509.1101 | 18244 | 112.0 | 121184 | 32.5  | 0.0279 |

| Meas. m/z | # | Ion Formula  | m/z      | err [ppm] | mSigma | Score | rdb    | e <sup>-</sup> | Conf | N-Rule |
|-----------|---|--------------|----------|-----------|--------|-------|--------|----------------|------|--------|
| 506.1093  | 1 | C29H26BrNNaO | 506.1090 | -0.6      | 11.3   | 1     | 100.00 | 16.5           | even | ok     |

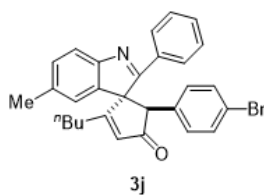

# Mass Spectrum List Report

## Analysis Info

Analysis Name D:\Data\chem. dep\liulu\ZYT-2-147\_P1-B-7\_01\_50187.d  
 Method Tune\_pos\_low\_LC with calibration\_2min\_20210727.m  
 Sample Name ZYT-2-147  
 Comment

Acquisition Date 4/9/2024 7:37:20 PM

Operator ECNU-Chem  
 Instrument maXis impact 282001.00122

## Acquisition Parameter

|             |          |                       |           |                  |           |
|-------------|----------|-----------------------|-----------|------------------|-----------|
| Source Type | ESI      | Ion Polarity          | Positive  | Set Nebulizer    | 1.5 Bar   |
| Focus       | Active   | Set Capillary         | 4500 V    | Set Dry Heater   | 180 °C    |
| Scan Begin  | 50 m/z   | Set End Plate Offset  | -500 V    | Set Dry Gas      | 6.0 l/min |
| Scan End    | 1350 m/z | Set Collision Cell RF | 700.0 Vpp | Set Divert Valve | Waste     |

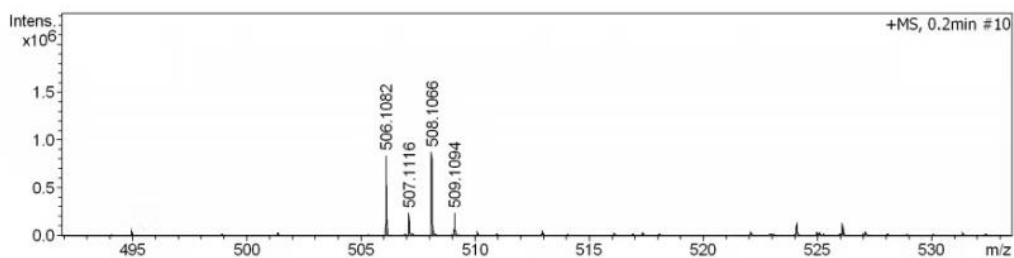

| # | m/z      | Res.  | S/N   | I      | I %   | FWHM   |
|---|----------|-------|-------|--------|-------|--------|
| 1 | 506.1082 | 27500 | 607.7 | 837948 | 95.9  | 0.0184 |
| 2 | 507.1116 | 20361 | 173.6 | 240120 | 27.5  | 0.0249 |
| 3 | 508.1066 | 27874 | 629.6 | 873548 | 100.0 | 0.0182 |
| 4 | 509.1094 | 20593 | 172.5 | 239864 | 27.5  | 0.0247 |

| Meas. m/z | # | Ion Formula                            | m/z      | err [ppm] | mSigma | Score | rdb    | e <sup>-</sup> Conf | N-Rule |
|-----------|---|----------------------------------------|----------|-----------|--------|-------|--------|---------------------|--------|
| 506.1082  | 1 | C <sub>29</sub> H <sub>26</sub> BrNNaO | 506.1090 | 1.6       | 22.4   | 1     | 100.00 | 16.5 even           | ok     |

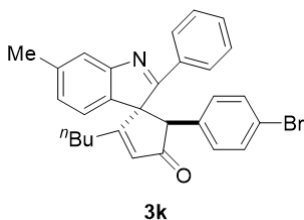

# Mass Spectrum List Report

## Analysis Info

Analysis Name D:\Data\chem. dep\lulu\ZYT-2-165\_P1-B-9\_01\_50189.d  
 Method Tune\_pos\_low\_LC with calibration\_2min\_20210727.m  
 Sample Name ZYT-2-165  
 Comment

Acquisition Date 4/9/2024 7:43:36 PM

Operator ECNU-Chem  
 Instrument maXis impact 282001.00122

## Acquisition Parameter

|             |          |                       |           |                  |           |
|-------------|----------|-----------------------|-----------|------------------|-----------|
| Source Type | ESI      | Ion Polarity          | Positive  | Set Nebulizer    | 1.5 Bar   |
| Focus       | Active   | Set Capillary         | 4500 V    | Set Dry Heater   | 180 °C    |
| Scan Begin  | 50 m/z   | Set End Plate Offset  | -500 V    | Set Dry Gas      | 6.0 l/min |
| Scan End    | 1350 m/z | Set Collision Cell RF | 700.0 Vpp | Set Divert Valve | Waste     |

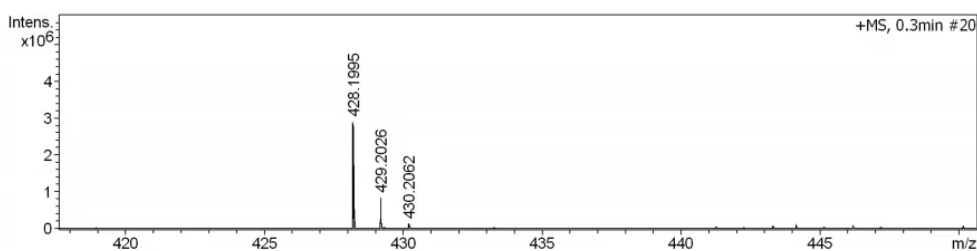

| # | m/z      | Res.  | S/N    | I       | I %   | FWHM   |
|---|----------|-------|--------|---------|-------|--------|
| 1 | 428.1995 | 26325 | 3586.3 | 2900816 | 100.0 | 0.0163 |
| 2 | 429.2026 | 23909 | 1041.7 | 844356  | 29.1  | 0.0180 |
| 3 | 430.2062 | 16600 | 160.6  | 130556  | 4.5   | 0.0259 |

| Meas. m/z | # | Ion Formula                          | m/z      | err [ppm] | mSigma | Score | rdb    | e <sup>-</sup> | Conf | N-Rule |
|-----------|---|--------------------------------------|----------|-----------|--------|-------|--------|----------------|------|--------|
| 428.1995  | 1 | C <sub>29</sub> H <sub>27</sub> NNaO | 428.1985 | -2.3      | 15.2   | 1     | 100.00 | 16.5           | even | ok     |

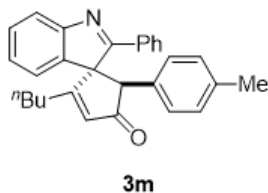

# Mass Spectrum List Report

## Analysis Info

Analysis Name D:\Data\chem. dep\liulu\ZYT-2-189\_P1-C-3\_01\_50197.d  
 Method Tune\_pos\_low\_LC with calibration\_2min\_20210727.m  
 Sample Name ZYT-2-189  
 Comment

Acquisition Date 4/9/2024 8:25:24 PM

Operator ECNU-Chem  
 Instrument maXis impact 282001.00122

## Acquisition Parameter

|             |          |                       |           |                  |           |
|-------------|----------|-----------------------|-----------|------------------|-----------|
| Source Type | ESI      | Ion Polarity          | Positive  | Set Nebulizer    | 1.5 Bar   |
| Focus       | Active   | Set Capillary         | 4500 V    | Set Dry Heater   | 180 °C    |
| Scan Begin  | 50 m/z   | Set End Plate Offset  | -500 V    | Set Dry Gas      | 6.0 l/min |
| Scan End    | 1350 m/z | Set Collision Cell RF | 700.0 Vpp | Set Divert Valve | Waste     |

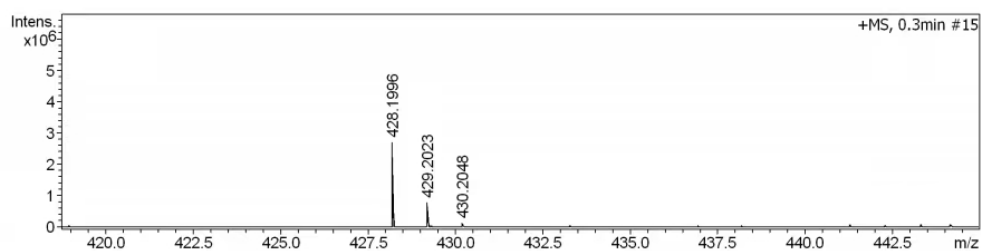

| # | m/z      | Res.  | S/N    | I       | I%    | FWHM   |
|---|----------|-------|--------|---------|-------|--------|
| 1 | 428.1996 | 27638 | 3232.3 | 2702328 | 100.0 | 0.0155 |
| 2 | 429.2023 | 25089 | 921.0  | 771008  | 28.5  | 0.0171 |
| 3 | 430.2048 | 19409 | 139.1  | 116776  | 4.3   | 0.0222 |

| Meas. m/z | # | Ion Formula                          | m/z      | err [ppm] | mSigma | Score | rdb    | e <sup>-</sup> | Conf | N-Rule |
|-----------|---|--------------------------------------|----------|-----------|--------|-------|--------|----------------|------|--------|
| 428.1996  | 1 | C <sub>29</sub> H <sub>27</sub> NNaO | 428.1985 | -2.7      | 18.3   | 1     | 100.00 | 16.5           | even | ok     |

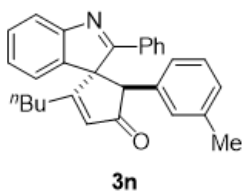



# Mass Spectrum List Report

## Analysis Info

Analysis Name D:\Data\chem. dep\liulu\ZYT-3-11\_P1-A-5\_01\_50337.d  
 Method Tune\_pos\_low\_LC with calibration\_2min\_20210727.m  
 Sample Name ZYT-3-11  
 Comment

Acquisition Date 4/12/2024 12:20:48 PM

Operator ECNU-Chem  
 Instrument maXis impact 282001.00122

## Acquisition Parameter

|             |          |                       |           |                  |           |
|-------------|----------|-----------------------|-----------|------------------|-----------|
| Source Type | ESI      | Ion Polarity          | Positive  | Set Nebulizer    | 1.5 Bar   |
| Focus       | Active   | Set Capillary         | 4500 V    | Set Dry Heater   | 180 °C    |
| Scan Begin  | 50 m/z   | Set End Plate Offset  | -500 V    | Set Dry Gas      | 6.0 l/min |
| Scan End    | 1350 m/z | Set Collision Cell RF | 700.0 Vpp | Set Divert Valve | Waste     |

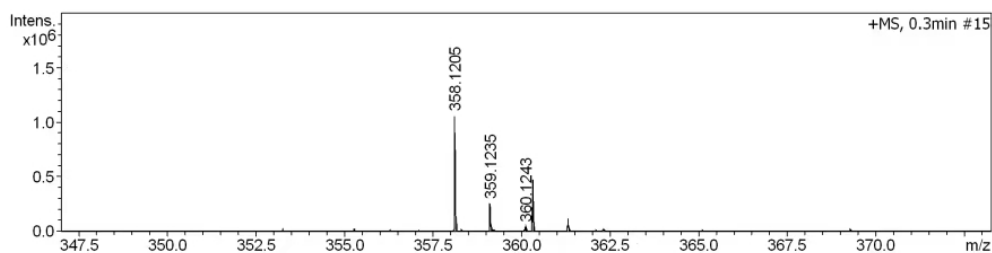

| # | m/z      | Res.  | S/N    | I       | I %   | FWHM   |
|---|----------|-------|--------|---------|-------|--------|
| 1 | 358.1205 | 23625 | 1465.1 | 1057560 | 100.0 | 0.0152 |
| 2 | 359.1235 | 18772 | 352.3  | 254396  | 24.1  | 0.0191 |
| 3 | 360.1243 | 16862 | 54.0   | 39052   | 3.7   | 0.0214 |

| Meas. m/z | # | Ion Formula                          | m/z      | err [ppm] | mSigma | Score | rdb    | e <sup>-</sup> Conf | N-Rule |
|-----------|---|--------------------------------------|----------|-----------|--------|-------|--------|---------------------|--------|
| 358.1205  | 1 | C <sub>24</sub> H <sub>17</sub> NNaO | 358.1202 | -0.6      | 14.5   | 1     | 100.00 | 16.5 even           | ok     |

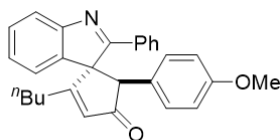

**3o**

# Mass Spectrum List Report

## Analysis Info

Analysis Name D:\Data\chem. dep\liulu\ZYT-2-192\_P1-C-2\_01\_50196.d  
 Method Tune\_pos\_low\_LC with calibration\_2min\_20210727.m  
 Sample Name ZYT-2-192  
 Comment

Acquisition Date 4/9/2024 8:22:16 PM

Operator ECNU-Chem  
 Instrument maXis impact 282001.00122

## Acquisition Parameter

|             |          |                       |           |                  |           |
|-------------|----------|-----------------------|-----------|------------------|-----------|
| Source Type | ESI      | Ion Polarity          | Positive  | Set Nebulizer    | 1.5 Bar   |
| Focus       | Active   | Set Capillary         | 4500 V    | Set Dry Heater   | 180 °C    |
| Scan Begin  | 50 m/z   | Set End Plate Offset  | -500 V    | Set Dry Gas      | 6.0 l/min |
| Scan End    | 1350 m/z | Set Collision Cell RF | 700.0 Vpp | Set Divert Valve | Waste     |

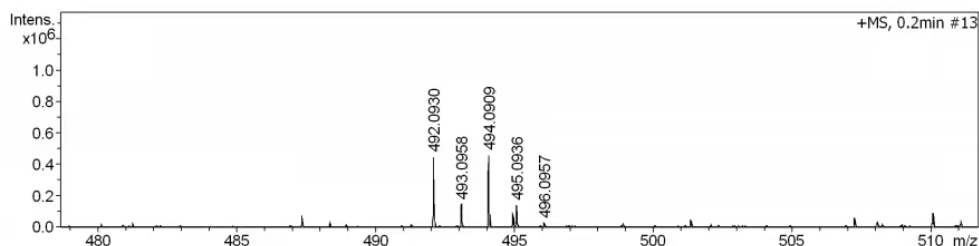

| # | m/z      | Res.  | S/N   | I      | I%    | FWHM   |
|---|----------|-------|-------|--------|-------|--------|
| 1 | 492.0930 | 21405 | 430.2 | 445448 | 97.2  | 0.0230 |
| 2 | 493.0958 | 19504 | 137.8 | 143056 | 31.2  | 0.0253 |
| 3 | 494.0909 | 22237 | 440.5 | 458224 | 100.0 | 0.0222 |
| 4 | 495.0936 | 19160 | 135.8 | 141536 | 30.9  | 0.0258 |
| 5 | 496.0957 | 17705 | 22.6  | 23644  | 5.2   | 0.0280 |

| Meas. m/z | # | Ion Formula  | m/z      | err [ppm] | mSigma | Score  | rdb  | e <sup>-</sup> | Conf | N-Rule |
|-----------|---|--------------|----------|-----------|--------|--------|------|----------------|------|--------|
| 492.0930  | 1 | C28H24BrNNaO | 492.0933 | 0.7       | 6.4    | 100.00 | 16.5 | even           |      | ok     |

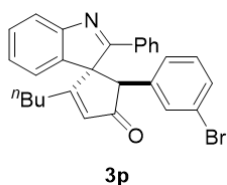

## Mass Spectrum List Report

### Analysis Info

Analysis Name D:\Data\chem. dep\liulu\ZYT-2-164\_P1-B-8\_01\_50188.d  
 Method Tune\_pos\_low\_LC with calibration\_2min\_20210727.m  
 Sample Name ZYT-2-164  
 Comment

Acquisition Date 4/9/2024 7:40:29 PM

Operator ECNU-Chem  
 Instrument maXis impact 282001.00122

### Acquisition Parameter

|             |          |                       |           |                  |           |
|-------------|----------|-----------------------|-----------|------------------|-----------|
| Source Type | ESI      | Ion Polarity          | Positive  | Set Nebulizer    | 1.5 Bar   |
| Focus       | Active   | Set Capillary         | 4500 V    | Set Dry Heater   | 180 °C    |
| Scan Begin  | 50 m/z   | Set End Plate Offset  | -500 V    | Set Dry Gas      | 6.0 l/min |
| Scan End    | 1350 m/z | Set Collision Cell RF | 700.0 Vpp | Set Divert Valve | Waste     |

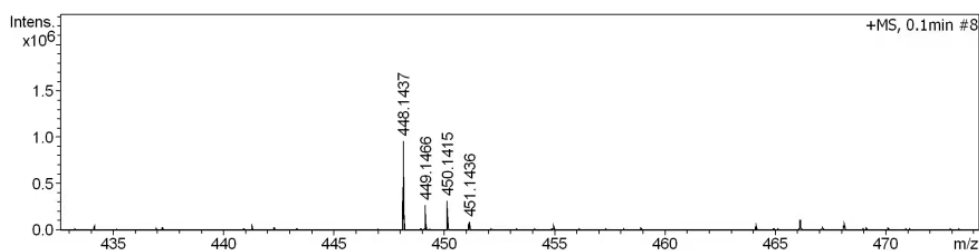

| # | m/z      | Res.  | S/N   | I      | I %   | FWHM   |
|---|----------|-------|-------|--------|-------|--------|
| 1 | 448.1437 | 28836 | 789.0 | 956160 | 100.0 | 0.0155 |
| 2 | 449.1466 | 21790 | 220.7 | 268332 | 28.1  | 0.0206 |
| 3 | 450.1415 | 21300 | 258.0 | 315024 | 32.9  | 0.0211 |
| 4 | 451.1436 | 17374 | 71.4  | 87460  | 9.1   | 0.0260 |

| Meas. m/z | # | Ion Formula                            | m/z      | err [ppm] | mSigma | Score | rdb    | e <sup>-</sup> Conf | N-Rule  |
|-----------|---|----------------------------------------|----------|-----------|--------|-------|--------|---------------------|---------|
| 448.1437  | 1 | C <sub>28</sub> H <sub>24</sub> ClNNaO | 448.1439 | 0.3       | 22.4   | 1     | 100.00 | 16.5                | even ok |

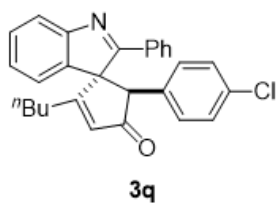

# Mass Spectrum List Report

## Analysis Info

Analysis Name D:\Data\chem. dep\liulu\ZYT-2-168\_P1-C-4\_01\_50198.d  
 Method Tune\_pos\_low\_LC with calibration\_2min\_20210727.m  
 Sample Name ZYT-2-168  
 Comment

Acquisition Date 4/9/2024 8:28:33 PM

Operator ECNU-Chem  
 Instrument maXis impact 282001.00122

## Acquisition Parameter

|             |          |                       |           |                  |           |
|-------------|----------|-----------------------|-----------|------------------|-----------|
| Source Type | ESI      | Ion Polarity          | Positive  | Set Nebulizer    | 1.5 Bar   |
| Focus       | Active   | Set Capillary         | 4500 V    | Set Dry Heater   | 180 °C    |
| Scan Begin  | 50 m/z   | Set End Plate Offset  | -500 V    | Set Dry Gas      | 6.0 l/min |
| Scan End    | 1350 m/z | Set Collision Cell RF | 700.0 Vpp | Set Divert Valve | Waste     |

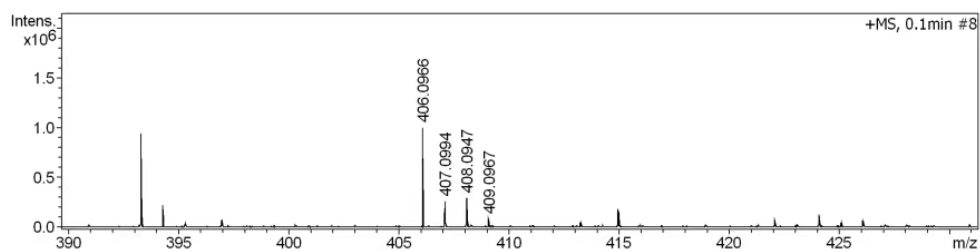

| # | m/z      | Res.  | S/N   | I      | I %   | FWHM   |
|---|----------|-------|-------|--------|-------|--------|
| 1 | 406.0966 | 29402 | 824.8 | 997972 | 100.0 | 0.0138 |
| 2 | 407.0994 | 22361 | 211.6 | 257320 | 25.8  | 0.0182 |
| 3 | 408.0947 | 19678 | 237.7 | 290816 | 29.1  | 0.0207 |
| 4 | 409.0967 | 17176 | 63.7  | 78264  | 7.8   | 0.0238 |

| Meas. m/z | # | Ion Formula  | m/z      | err [ppm] | mSigma | Score | rdB    | e <sup>-</sup> | Conf | N-Rule |
|-----------|---|--------------|----------|-----------|--------|-------|--------|----------------|------|--------|
| 406.0966  | 1 | C25H18ClNNaO | 406.0969 | 0.7       | 31.9   | 1     | 100.00 | 16.5           | even | ok     |

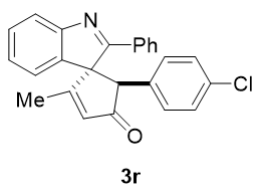

# Mass Spectrum List Report

## Analysis Info

Analysis Name D:\Data\chem. dep\liulu\ZYT-2-167\_P1-A-1\_01\_50172.d  
 Method Tune\_pos\_low\_LC with calibration\_2min\_20210727.m  
 Sample Name ZYT-2-167  
 Comment

Acquisition Date 4/9/2024 6:50:14 PM

Operator ECNU-Chem  
 Instrument maXis impact 282001.00122

## Acquisition Parameter

|             |          |                       |           |                  |           |
|-------------|----------|-----------------------|-----------|------------------|-----------|
| Source Type | ESI      | Ion Polarity          | Positive  | Set Nebulizer    | 1.5 Bar   |
| Focus       | Active   | Set Capillary         | 4500 V    | Set Dry Heater   | 180 °C    |
| Scan Begin  | 50 m/z   | Set End Plate Offset  | -500 V    | Set Dry Gas      | 6.0 l/min |
| Scan End    | 1350 m/z | Set Collision Cell RF | 700.0 Vpp | Set Divert Valve | Waste     |

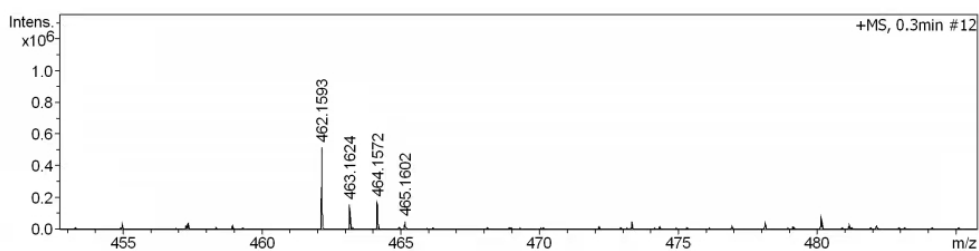

| # | m/z      | Res.  | S/N   | I      | I %   | FWHM   |
|---|----------|-------|-------|--------|-------|--------|
| 1 | 462.1593 | 23458 | 486.9 | 513692 | 100.0 | 0.0197 |
| 2 | 463.1624 | 18442 | 147.6 | 155920 | 30.4  | 0.0251 |
| 3 | 464.1572 | 17948 | 165.4 | 174932 | 34.1  | 0.0259 |
| 4 | 465.1602 | 16572 | 48.2  | 51184  | 10.0  | 0.0281 |

| Meas. m/z | # | Ion Formula                            | m/z      | err [ppm] | mSigma | Score | rdb    | e <sup>-</sup> | Conf | N-Rule |
|-----------|---|----------------------------------------|----------|-----------|--------|-------|--------|----------------|------|--------|
| 462.1593  | 1 | C <sub>29</sub> H <sub>26</sub> ClNNaO | 462.1595 | 0.4       | 16.4   | 1     | 100.00 | 16.5           | even | ok     |

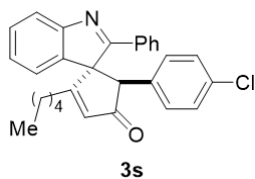

# Mass Spectrum List Report

## Analysis Info

Analysis Name D:\Data\chem. dep\liulu\ZYT-2-94\_P1-A-2\_01\_50173.d  
 Method Tune\_pos\_low\_LC with calibration\_2min\_20210727.m  
 Sample Name ZYT-2-94  
 Comment

Acquisition Date 4/9/2024 6:53:22 PM

Operator ECNU-Chem  
 Instrument maXis impact 282001.00122

## Acquisition Parameter

|             |          |                       |           |                  |           |
|-------------|----------|-----------------------|-----------|------------------|-----------|
| Source Type | ESI      | Ion Polarity          | Positive  | Set Nebulizer    | 1.5 Bar   |
| Focus       | Active   | Set Capillary         | 4500 V    | Set Dry Heater   | 180 °C    |
| Scan Begin  | 50 m/z   | Set End Plate Offset  | -500 V    | Set Dry Gas      | 6.0 l/min |
| Scan End    | 1350 m/z | Set Collision Cell RF | 700.0 Vpp | Set Divert Valve | Waste     |

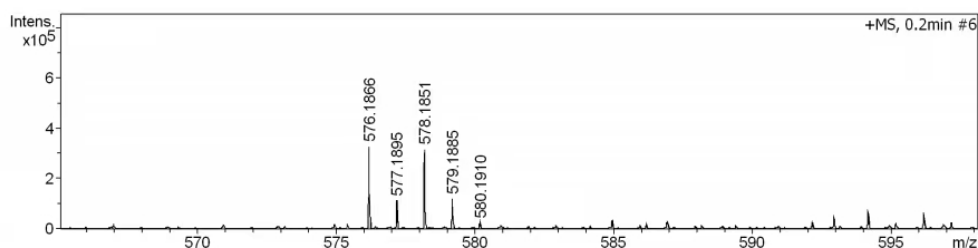

| # | m/z      | Res.  | S/N   | I      | I %   | FWHM   |
|---|----------|-------|-------|--------|-------|--------|
| 1 | 576.1866 | 22042 | 254.2 | 327152 | 100.0 | 0.0261 |
| 2 | 577.1895 | 17416 | 87.0  | 112384 | 34.4  | 0.0331 |
| 3 | 578.1851 | 21786 | 243.6 | 315404 | 96.4  | 0.0265 |
| 4 | 579.1885 | 19008 | 91.5  | 118724 | 36.3  | 0.0305 |
| 5 | 580.1910 | 16265 | 17.6  | 23000  | 7.0   | 0.0357 |

| Meas. m/z | # | Ion Formula  | m/z      | err [ppm] | mSigma | Score | rdb    | e <sup>-</sup> Conf | N-Rule     |
|-----------|---|--------------|----------|-----------|--------|-------|--------|---------------------|------------|
| 576.1866  | 1 | C34H36BrNNaO | 576.1872 | 1.1       | 23.7   | 1     | 100.00 | 16.5                | even<br>ok |

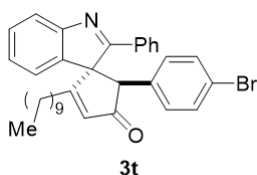

# Mass Spectrum List Report

## Analysis Info

Analysis Name D:\Data\chem. dep\liulu\ZYT-2-73\_P1-A-3\_01\_50174.d  
 Method Tune\_pos\_low\_LC with calibration\_2min\_20210727.m  
 Sample Name ZYT-2-73  
 Comment

Acquisition Date 4/9/2024 6:56:31 PM  
 Operator ECNU-Chem  
 Instrument maXis impact 282001.00122

## Acquisition Parameter

|             |          |                       |           |                  |           |
|-------------|----------|-----------------------|-----------|------------------|-----------|
| Source Type | ESI      | Ion Polarity          | Positive  | Set Nebulizer    | 1.5 Bar   |
| Focus       | Active   | Set Capillary         | 4500 V    | Set Dry Heater   | 180 °C    |
| Scan Begin  | 50 m/z   | Set End Plate Offset  | -500 V    | Set Dry Gas      | 6.0 l/min |
| Scan End    | 1350 m/z | Set Collision Cell RF | 700.0 Vpp | Set Divert Valve | Waste     |

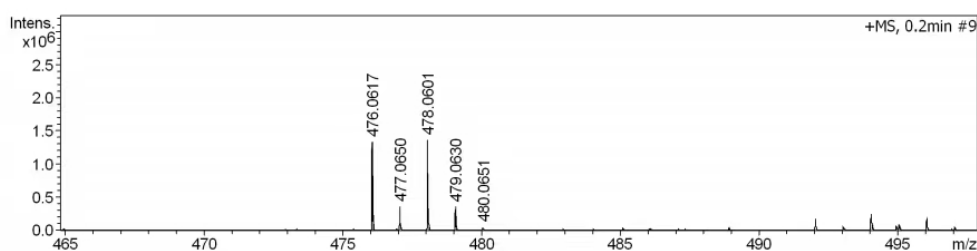

| # | m/z      | Res.  | S/N    | I       | I %   | FWHM   |
|---|----------|-------|--------|---------|-------|--------|
| 1 | 476.0617 | 30643 | 1074.0 | 1335940 | 98.1  | 0.0155 |
| 2 | 477.0650 | 22691 | 287.9  | 358516  | 26.3  | 0.0210 |
| 3 | 478.0601 | 30480 | 1091.7 | 1361860 | 100.0 | 0.0157 |
| 4 | 479.0630 | 21382 | 283.2  | 353780  | 26.0  | 0.0224 |
| 5 | 480.0651 | 15560 | 41.3   | 51632   | 3.8   | 0.0309 |

| Meas. m/z | # | Ion Formula  | m/z      | err [ppm] | mSigma | Score  | rdb  | e <sup>-</sup> | Conf | N-Rule |
|-----------|---|--------------|----------|-----------|--------|--------|------|----------------|------|--------|
| 476.0617  | 1 | C27H20BrNNaO | 476.0620 | 0.6       | 17.4   | 100.00 | 17.5 | even           |      | ok     |

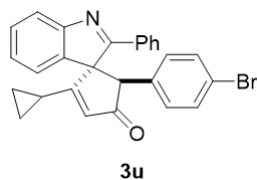

# Mass Spectrum List Report

## Analysis Info

Analysis Name D:\Data\chem. dep\liulu\ZYT-3-6\_P1-A-6\_01\_50338.d  
 Method Tune\_pos\_low\_LC with calibration\_2min\_20210727.m  
 Sample Name ZYT-3-6  
 Comment

Acquisition Date 4/12/2024 12:23:58 PM  
 Operator ECNU-Chem  
 Instrument maXis impact 282001.00122

## Acquisition Parameter

|             |          |                       |           |                  |           |
|-------------|----------|-----------------------|-----------|------------------|-----------|
| Source Type | ESI      | Ion Polarity          | Positive  | Set Nebulizer    | 1.5 Bar   |
| Focus       | Active   | Set Capillary         | 4500 V    | Set Dry Heater   | 180 °C    |
| Scan Begin  | 50 m/z   | Set End Plate Offset  | -500 V    | Set Dry Gas      | 6.0 l/min |
| Scan End    | 1350 m/z | Set Collision Cell RF | 700.0 Vpp | Set Divert Valve | Waste     |

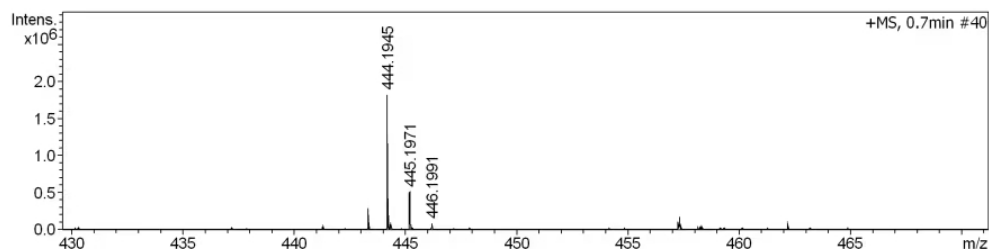

| # | m/z      | Res.  | S/N    | I       | I %   | FWHM   |
|---|----------|-------|--------|---------|-------|--------|
| 1 | 444.1945 | 26524 | 2367.2 | 1814104 | 100.0 | 0.0167 |
| 2 | 445.1971 | 21730 | 665.7  | 510652  | 28.1  | 0.0205 |
| 3 | 446.1991 | 17436 | 102.6  | 78764   | 4.3   | 0.0256 |

| Meas. m/z | # | Ion Formula                                       | m/z      | err [ppm] | mSigma | Score | rdb    | e <sup>-</sup> | Conf | N-Rule |
|-----------|---|---------------------------------------------------|----------|-----------|--------|-------|--------|----------------|------|--------|
| 444.1945  | 1 | C <sub>29</sub> H <sub>27</sub> NNaO <sub>2</sub> | 444.1934 | -2.4      | 20.5   | 1     | 100.00 | 16.5           | even | ok     |

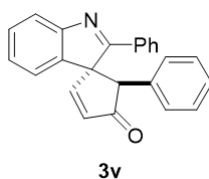



# Mass Spectrum List Report

## Analysis Info

Analysis Name D:\Data\chem. dep\lulu\ZYT-2-196-1\_P1-A-7\_01\_49138.d  
 Method Tune\_pos\_low\_LC with calibration\_2min\_20210727.m  
 Sample Name ZYT-2-196-1  
 Comment

Acquisition Date 1/30/2024 4:02:01 PM  
 Operator ECNU-Chem  
 Instrument maXis impact 282001.00122

## Acquisition Parameter

|             |          |                       |           |                  |           |
|-------------|----------|-----------------------|-----------|------------------|-----------|
| Source Type | ESI      | Ion Polarity          | Positive  | Set Nebulizer    | 1.5 Bar   |
| Focus       | Active   | Set Capillary         | 4500 V    | Set Dry Heater   | 180 °C    |
| Scan Begin  | 50 m/z   | Set End Plate Offset  | -500 V    | Set Dry Gas      | 6.0 l/min |
| Scan End    | 1350 m/z | Set Collision Cell RF | 700.0 Vpp | Set Divert Valve | Waste     |

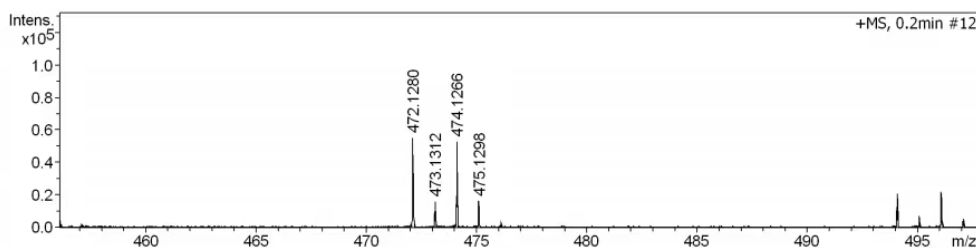

| # | m/z      | Res.  | S/N   | I     | I %   | FWHM   |
|---|----------|-------|-------|-------|-------|--------|
| 1 | 472.1280 | 20475 | 126.8 | 54996 | 100.0 | 0.0231 |
| 2 | 473.1312 | 18421 | 36.6  | 15884 | 28.9  | 0.0257 |
| 3 | 474.1266 | 18354 | 121.8 | 52772 | 96.0  | 0.0258 |
| 4 | 475.1298 | 21660 | 37.7  | 16320 | 29.7  | 0.0219 |

| Meas. m/z | # | Ion Formula                          | m/z      | err [ppm] | mSigma | Score | rdb    | e <sup>-</sup> | Conf | N-Rule |
|-----------|---|--------------------------------------|----------|-----------|--------|-------|--------|----------------|------|--------|
| 472.1280  | 1 | C <sub>28</sub> H <sub>27</sub> BrNO | 472.1271 | -2.0      | 20.0   | 1     | 100.00 | 15.5           | even | ok     |

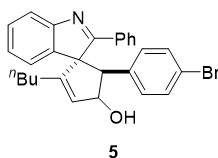

# Mass Spectrum List Report

## Analysis Info

Analysis Name D:\Data\chem. dep\liulu\ZYT-2-196-2\_P1-A-8\_01\_49139.d  
 Method Tune\_pos\_low\_LC with calibration\_2min\_20210727.m  
 Sample Name ZYT-2-196-2  
 Comment

Acquisition Date 1/30/2024 4:05:09 PM  
 Operator ECNU-Chem  
 Instrument maXis impact 282001.00122

## Acquisition Parameter

|             |          |                       |           |                  |           |
|-------------|----------|-----------------------|-----------|------------------|-----------|
| Source Type | ESI      | Ion Polarity          | Positive  | Set Nebulizer    | 1.5 Bar   |
| Focus       | Active   | Set Capillary         | 4500 V    | Set Dry Heater   | 180 °C    |
| Scan Begin  | 50 m/z   | Set End Plate Offset  | -500 V    | Set Dry Gas      | 6.0 l/min |
| Scan End    | 1350 m/z | Set Collision Cell RF | 700.0 Vpp | Set Divert Valve | Waste     |

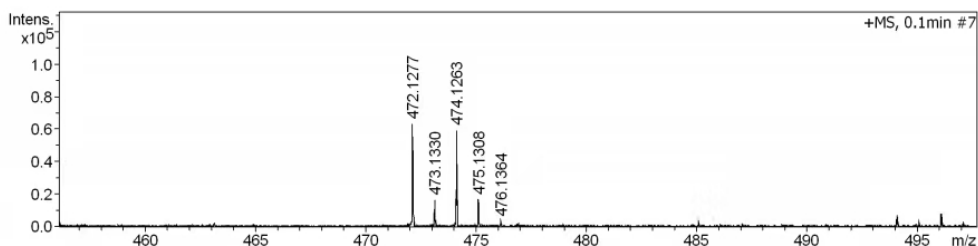

| # | m/z      | Res.  | S/N   | I     | I%    | FWHM   |
|---|----------|-------|-------|-------|-------|--------|
| 1 | 472.1277 | 21284 | 129.0 | 63124 | 100.0 | 0.0222 |
| 2 | 473.1330 | 19210 | 33.9  | 16560 | 26.2  | 0.0246 |
| 3 | 474.1263 | 18981 | 121.2 | 59200 | 93.8  | 0.0250 |
| 4 | 475.1308 | 18063 | 34.3  | 16724 | 26.5  | 0.0263 |
| 5 | 476.1364 | 20135 | 6.4   | 3100  | 4.9   | 0.0236 |

| Meas. m/z | # | Ion Formula                          | m/z      | err [ppm] | mSigma | Score | rdb    | e <sup>-</sup> Conf | N-Rule     |
|-----------|---|--------------------------------------|----------|-----------|--------|-------|--------|---------------------|------------|
| 472.1277  | 1 | C <sub>28</sub> H <sub>27</sub> BrNO | 472.1271 | -1.4      | 34.8   | 1     | 100.00 | 15.5                | even<br>ok |

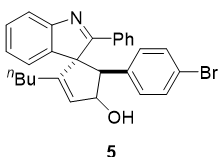

# Mass Spectrum List Report

## Analysis Info

Analysis Name D:\Data\chem. dep\liulu\ZYT-2-199-1\_P1-B-2\_01\_50449.d  
 Method Tune\_pos\_low\_LC with calibration\_2min\_20210727.m  
 Sample Name ZYT-2-199-1  
 Comment

Acquisition Date 4/15/2024 1:58:55 PM

Operator ECNU-Chem  
 Instrument maXis impact 282001.00122

## Acquisition Parameter

|             |          |                       |           |                  |           |
|-------------|----------|-----------------------|-----------|------------------|-----------|
| Source Type | ESI      | Ion Polarity          | Positive  | Set Nebulizer    | 1.5 Bar   |
| Focus       | Active   | Set Capillary         | 4500 V    | Set Dry Heater   | 180 °C    |
| Scan Begin  | 50 m/z   | Set End Plate Offset  | -500 V    | Set Dry Gas      | 6.0 l/min |
| Scan End    | 1350 m/z | Set Collision Cell RF | 700.0 Vpp | Set Divert Valve | Waste     |

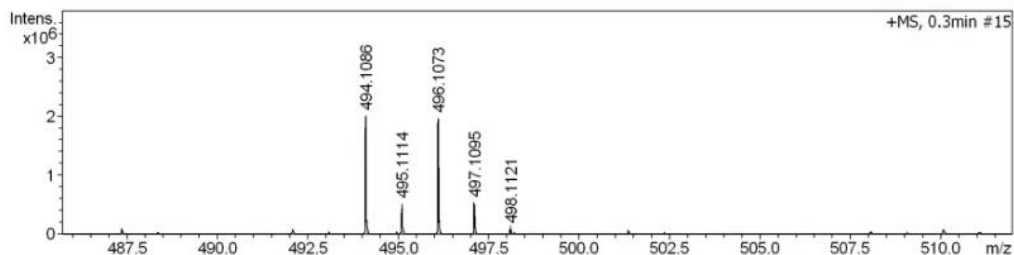

| # | m/z      | Res.  | S/N    | I       | I %   | FWHM   |
|---|----------|-------|--------|---------|-------|--------|
| 1 | 494.1086 | 27688 | 2140.2 | 2010468 | 100.0 | 0.0178 |
| 2 | 495.1114 | 22545 | 560.5  | 527296  | 26.2  | 0.0220 |
| 3 | 496.1073 | 28534 | 2090.2 | 1970488 | 98.0  | 0.0174 |
| 4 | 497.1095 | 23574 | 576.1  | 543904  | 27.1  | 0.0211 |
| 5 | 498.1121 | 18971 | 95.4   | 90184   | 4.5   | 0.0263 |

| Meas. m/z | # | Ion Formula  | m/z      | err [ppm] | mSigma | Score | rdB    | e <sup>-</sup> Conf | N-Rule  |
|-----------|---|--------------|----------|-----------|--------|-------|--------|---------------------|---------|
| 494.1086  | 1 | C28H26BrNNaO | 494.1090 | 0.8       | 23.8   | 1     | 100.00 | 15.5                | even ok |

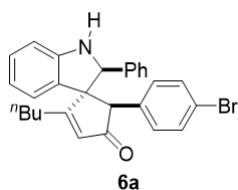

## Mass Spectrum List Report

### Analysis Info

Analysis Name D:\Data\chem. dep\liulu\ZYT-2-39-2\_P1-A-2\_01\_41896.d  
 Method Tune\_pos\_low\_LC with calibration\_2min\_20210727.m  
 Sample Name ZYT-2-39-2  
 Comment

Acquisition Date 6/29/2023 2:36:01 PM

Operator ECNU-Chem  
 Instrument maXis impact 282001.00122

### Acquisition Parameter

|             |          |                       |           |                  |           |
|-------------|----------|-----------------------|-----------|------------------|-----------|
| Source Type | ESI      | Ion Polarity          | Positive  | Set Nebulizer    | 1.5 Bar   |
| Focus       | Active   | Set Capillary         | 4500 V    | Set Dry Heater   | 180 °C    |
| Scan Begin  | 50 m/z   | Set End Plate Offset  | -500 V    | Set Dry Gas      | 6.0 l/min |
| Scan End    | 1350 m/z | Set Collision Cell RF | 700.0 Vpp | Set Divert Valve | Waste     |

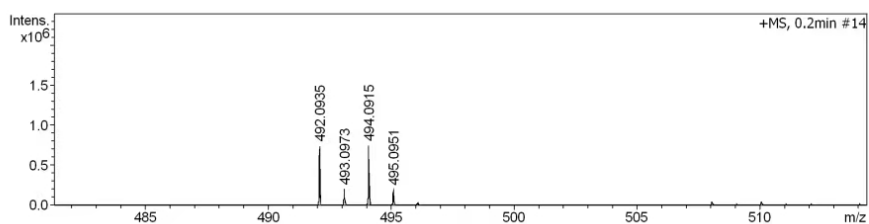

| # | m/z      | Res.  | S/N    | I      | I %   | FWHM   |
|---|----------|-------|--------|--------|-------|--------|
| 1 | 492.0935 | 23279 | 1628.4 | 739208 | 99.4  | 0.0211 |
| 2 | 493.0973 | 18370 | 443.5  | 201344 | 27.1  | 0.0268 |
| 3 | 494.0915 | 23406 | 1637.3 | 743524 | 100.0 | 0.0211 |
| 4 | 495.0951 | 17503 | 422.2  | 191644 | 25.8  | 0.0283 |

| Meas. m/z | # | Ion Formula  | m/z      | err [ppm] | mSigma | Score | rdb    | e <sup>-</sup> Conf | N-Rule |
|-----------|---|--------------|----------|-----------|--------|-------|--------|---------------------|--------|
| 492.0935  | 1 | C28H24BrNNaO | 492.0933 | -0.3      | 23.3   | 1     | 100.00 | 16.5 even           | ok     |

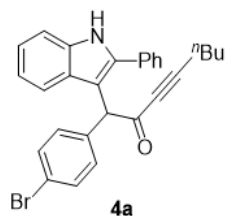

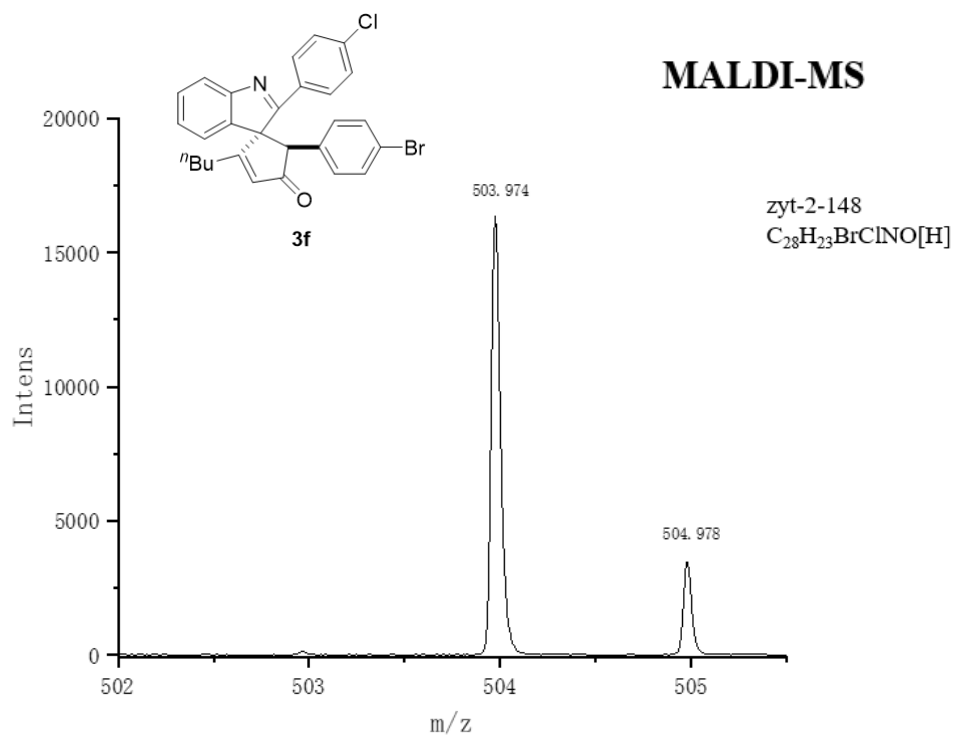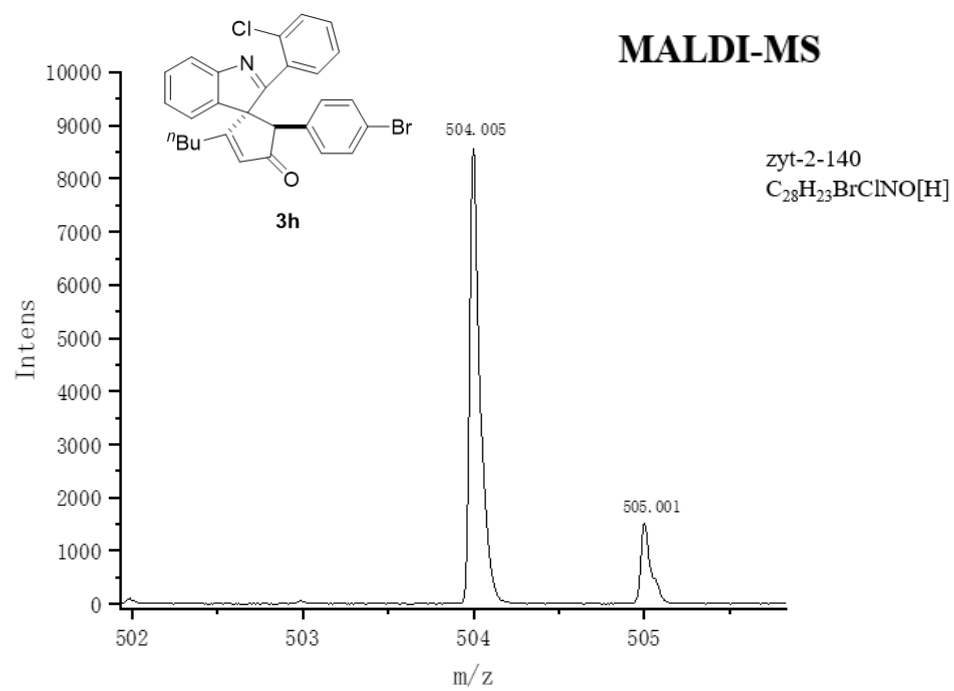

## MALDI-MS

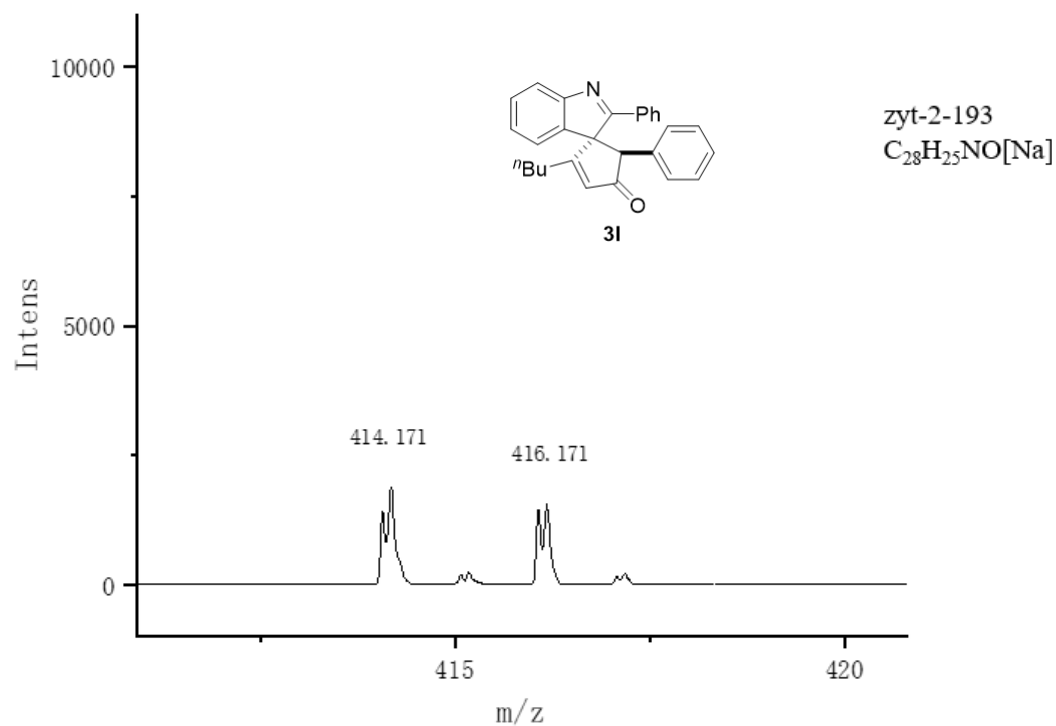

## MALDI-MS

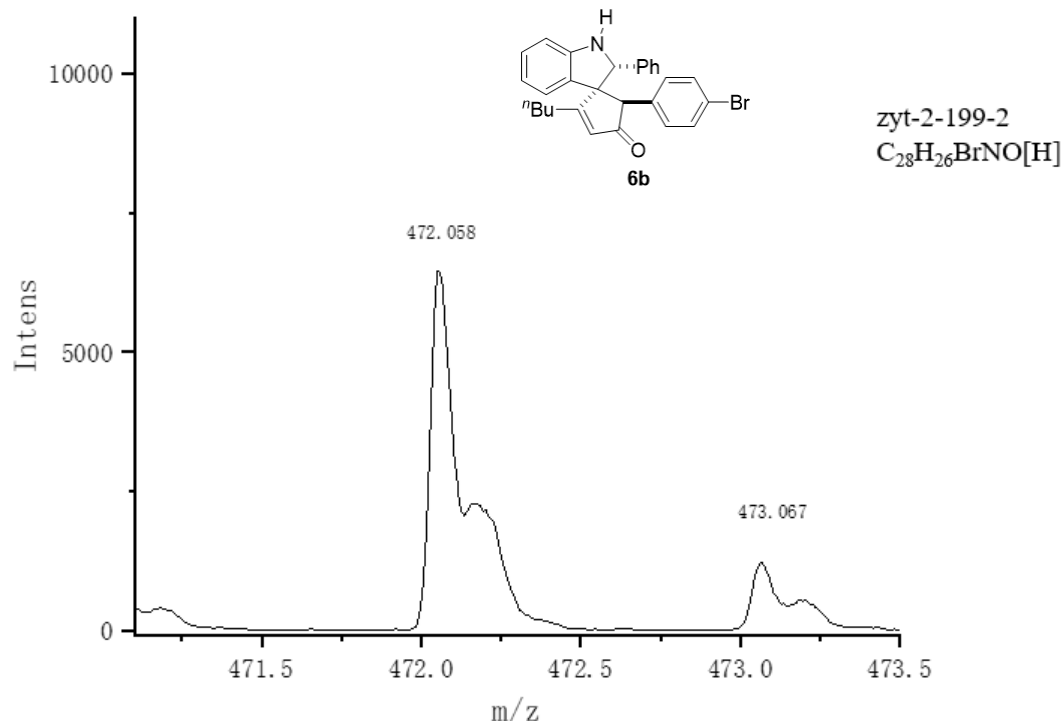

Supplement: d5cc00594a1.pdf [file d5cc00594a1.pdf]
